# Supplementary material
Source: PubMed Central journal article supplement (PMC9277501)

## Supplemental Online Content

Eldridge N, Wang Y, Metersky M, et al. Trends in adverse event rates in hospitalized patients, 2010-2019. *JAMA*. Published July 12, 2022. doi:10.1001/jama.2022.9600

**eText.** Details Regarding the MPSMS Sample during the Period of Study

**eTable 1.** MPSMS Historical Sampling and Exclusions

**eTable 2.** Percent of Overall Sample Represented by Each Condition, 2010-2019

**eTable 3.** Summary National Inpatient Mortality and Length-of-Stay Data from HCUPnet (<https://hcupnet.ahrq.gov/#setup>), 2010-2017

**eTable 4.** Patient Characteristics, Hospital Characteristics, and Outcomes for Combined AMI, HF, Pneumonia, and Surgical Care (Four Conditions) Patients, 2010-2019

**eTable 5.** Patient Characteristics, Hospital Characteristics, and Outcomes for All-Other Conditions Patients, 2012-2019

**eTable 6.** Patient Characteristics, Hospital Characteristics, and Outcomes for AMI patients, 2010-2019

**eTable 7.** Patient Characteristics, Hospital Characteristics, and Outcomes for HF patients, 2010-2019

**eTable 8.** Patient Characteristics, Hospital Characteristics, and Outcomes for Pneumonia patients, 2010-2019

**eTable 9.** Patient Characteristics, Hospital Characteristics, and Outcomes for SCIP patients, 2010-2019

**eTable 10.** MPSMS Adverse Event and Exposure Data for AMI patients, 2010-2019

**eTable 11.** MPSMS Adverse Event and Exposure Data for HF patients, 2010-2019

**eTable 12.** MPSMS Adverse Event and Exposure Data for PNE patients, 2010-2019

**eTable 13.** MPSMS Adverse Event and Exposure Data for SCIP patients, 2010-2019

**eTable 14.** MPSMS Adverse Event and Exposure Data for All-Other Conditions patients, 2012-2019

**eTable 15.** Table Containing the Data in Figure 1

**eTable 16.** Table Containing the Data in Figure 4

**eTable 17.** Observed In-hospital Mortality Data for Patients Experiencing and not Experiencing each of the 21 MPSMS Adverse Events

**eTable 18.** Observed Length of Stay (LOS) Data for Patients Experiencing and not Experiencing each of the 21 MPSMS Adverse Events

**eFigure 1A.** Risk-Adjusted Annual Trend in the Rate of Occurrence of Adverse Events for Which Patients Were at Risk for Five Patient Groups for All Adverse Events and for Four Adverse Event Domains, 2010-2019 (2012-2019 for All-other Conditions)

**eFigure 1B.** Risk-Adjusted Annual Trend in the Proportion of Patients with One or More Adverse Events for Five Patient Groups for All Adverse Events and for Four Adverse Event Domains, 2010-2019 (2012-2019 for All-other Conditions)

**eFigure 2A.** Adjusted Annual Changes in Adverse Events by Year and Four Conditions (Referred to 2010)

**eFigure 2B.** Adjusted Annual Changes in Adverse Events by Year (Referred to 2012, All-Other Conditions)

**eFigure 3.** Patients 65 years old and over only: Risk-Adjusted Annual Change in Adverse Events by Clinical Domains and Overall, 2010-2019 (2012-2019 for “All-Other Conditions”)

**eFigure 4.** Risk-Adjusted Annual Change in Adverse Events by Clinical Domains and Overall (including Elixhauser comorbidities (2012-2019 for “All-Other Conditions”)

**eFigure 5.** Risk-Adjusted Annual Change by Clinical Domains and Overall (2010-2014 and 2014 to 2019)

**eFigure 6.** Observed Change in Number of Adverse Events per 1,000 Discharges by Age, Race, and Sex (gender), for the Five Patient Demographical Groups

**eFigure 7.** Observed Change in Number of Adverse Events per 1,000 Discharges by Region of the United States (as defined by US Census Bureau) and by Patient Groups

**eFigure 8.** Risk-Adjusted Annual Change in Adverse Events by Regions of the United States and Condition

This supplemental material has been provided by the authors to give readers additional information about their work.

## eText. Details Regarding the MPSMS Sample during the Period of Study

### Background

The medical records included in the MPSMS were randomly selected from among those hospitals, required by the Centers for Medicare & Medicaid Services (CMS), to submit information for its Inpatient Quality Reporting (IQR) program. Many of the charts used were directly re-purposed from Hospital IQR program validation activities and the remainder were randomly sampled from the universe of all payer hospital discharges for adult inpatients reported to the program. The sample size was set based on several considerations, including budget considerations. The aim was to obtain as much information as possible within budget constraints and to produce estimates with as much precision as possible given those constraints. The belief was that the greater the number of charts evaluated, the greater the opportunity to obtain precise estimates overall, for subgroups, and among different types of adverse events. Thus, the final size was a result of considering the total budget available for chart abstraction, the number of charts available to re-purpose from the Hospital Inpatient Quality Reporting program, the adverse event rate in each stratum, and the relative frequency of discharges in that stratum relative to the total population of hospital discharges. There was no specific sample size calculation at the outset. The CMS process for selecting medical records for IQR validation changed in 2015.

Thus, we describe it separately here for 2009- to Q2 of 2014 and Q3 of 2014-2019.

### 2009-2014

#### Four Condition Sample

CMS required hospitals to submit patient information (cases) for quality measures in the IQR for four “conditions”: Acute Myocardial Infarction (AMI), Heart Failure (HF), Pneumonia and major surgical procedures included in the Surgical Care Improvement Project (SCIP). These conditions are defined by quality measure denominator specifications.<sup>1</sup> CMS selected medical records for case validation using the following two steps:

1. CMS randomly selected approximately 400-800 acute care hospitals per year from approximately 3400 hospitals to participate in national validation of the IQR program measures.
  - a. Through 2012, new hospitals were sampled in Q4. Starting in 2013, new hospitals were sampled in Q3. In some years and quarters, CMS included the same hospitals from the previous quarter; in others, they resampled (eTable 1).
2. From each of the selected hospitals, CMS required hospitals to submit a set number of medical records per condition per quarter (which varied across years and conditions) for validation. Typically, this was 12 medical records per condition per hospital per year. CMS randomly assigned the specific medical records the hospitals should submit from among each hospital’s reported cases for each condition. Hospitals with fewer than the 12 cases submitted all available medical records and were asked to substitute records from other conditions to meet their quota.

From these submitted records, the MPSMS team selected cases for inclusion in the MPSMS using the following two steps.

1. MPSMS team set volume targets that were budget related for each condition from among the acquired charts. In some years, all the charts provided above were included.
2. CMS then randomly selected from the submitted charts the charts for MPSMS inclusion.

---

<sup>1</sup> For AMI, SCIP:

<https://www.qualitynet.org/dcs/ContentServer?c=Page&pagename=QnetPublic%2FPage%2FQnetTier4&cid=1228774725171>.

For HF and PN, only ICD-9 codes are publicly available.

<https://www.qualitynet.org/dcs/ContentServer?c=Page&pagename=QnetPublic%2FPage%2FQnetTier3&cid=1228773989482>

## Global Population 2011-Q2 2014

In Q4 2011, CMS started requiring hospitals to submit cases for a new “global population” sample, comprised of hospitalized patients representing all payers and all diagnoses. Specifically, from among the 400 -800 randomly selected “national validation sample” hospitals, CMS randomly selected 12 cases from across all discharges and those ages 18 and older, for all payers, and required hospitals to submit the medical records for these cases. The MPSMS team included a randomly selected subset of these medical records in the MPSMS. The team excluded medical records for patients that met eligibility criteria for inclusion in the four condition samples listed above. The remaining medical records comprise the “All-Other Conditions” sample in the MPSMS.

## Q3 2014-2019

In 2015, CMS changed the quality measures it included in the Hospital IQR Program. A commensurate shift in the available medical records to repurpose for the MPSMS from those submitted for IQR Program validation started in Q3 2014.

1. In Q3 2014 and Q4 2014 the four-condition sample was not collected as part of the IQR, since medical records were not requested for validation. However, medical records were still in the warehouse and could be used. The same 400 hospitals from Q1 and Q2 of 2014 were included.
2. In Q1 2015 for Hospital IQR Program measure validation, CMS started by randomly selecting approximately 400 hospitals per year from approximately 3400 US hospitals to participate in national validation of the IQR program measures.
3. From each of the selected hospitals, CMS required submission of a set number of randomly selected medical records. However, the approach to medical record selection no longer targeted the four conditions.
4. Instead, CMS identified and required hospitals to submit up to 32 randomly chosen medical records per hospital per year for IQR measure validation. The MPSMS team sought to build from these medical records a sample for MPSMS that was approximately representative of the distribution of inpatient stays; the “All Other Conditions” sample.
5. In 2015 and 2016, CMS phased out reporting of all the conditions in the four-condition sample. Therefore, there were no medical records to “repurpose” for MPSMS. To re-construct the “four-condition sample,” the MPSMS team had to draw a completely new sample of hospitals and reconstruct its four-condition sample from medical records available in the Hospital IQR Program warehouse. In 2014, these medical records were still drawn from cases submitted to the program warehouse for the four-condition measures. But starting in 2015, the medical records were identified from the “global population” data representing all payers and diagnoses submitted and subsetted to include the four condition medical records. In 2014 and 2015 new reporting measures for venous thromboembolism and stroke were added to the IQR measures. Some of these cases also contained a principal diagnosis of AMI, HF pneumonia or SCIP. To maintain comparability and align with previous analyses, we excluded these medical records from the 2014 and 2015 four-condition sample.
6. The MPSMS team determined the number of medical records it had funding for to abstract for each condition, and CMS randomly selected the number of hospitals and medical records for each of the four conditions and the “All Other Conditions” samples.<sup>2</sup>

As a result of budget constraints, the total number of medical records in the MPSMS decreased from 27,898 in 2016 to 14,952 in 2018. Medical records for service delivered in Q3 and Q4 of 2019 were scheduled to be requested from hospitals during the COVID-19 pandemic. CMS determined that it would not request *any* medical records even on a voluntary basis for the four-condition sample through December 2020, and it would receive only voluntary submission of Hospital IQR Program medical records for validation. For this reason, the sample size was 10,199 in 2019, and the proportion AMI, HF, PN and SCIP charts included decreased from 2015-2019 (eTable 2).

---

<sup>2</sup> For more details about the validation random sample, see the Federal Register: 74 FR 43885 August 2009, 75 FR 50227 August 2010, and 79 FR 50263 August 2014

To minimize burden to hospitals submitting data for the validation samples, selection of hospitals for the MPSMS supplemental sample was limited to hospitals eligible but not selected for the validation samples in the relevant quarters. A small number of additional hospitals were excluded in certain quarters when requirements to submit data were waived because of hurricanes and other natural disasters. When hospitals were excluded after the sample was drawn for the year, additional hospitals were sampled from the remaining non-excluded hospitals. eTable 1 shows an outline of MPSMS historical sampling and exclusions starting in 2015, including the number of hospitals sampled each quarter and the number excluded each quarter.

**eTable 1. MPSMS Historical Sampling and Exclusions**

| OBS | YEAR | QUARTER | ALL HOSPITALS <sup>1</sup> | ALL OPEN HOSPITALS | IQR HOSPITAL EXCLUSIONS | FEMA HOSPITAL EXCLUSIONS | IHS HOSPITAL EXCLUSIONS | MPSMS HOSPITAL SAMPLE | TOTAL HOSPITALS RESAMPLED | TOTAL HOSPITALS DELIVERED |
|-----|------|---------|----------------------------|--------------------|-------------------------|--------------------------|-------------------------|-----------------------|---------------------------|---------------------------|
| 1   | 2015 | Q1      | 3,283                      | 3,248              | 594                     | 0                        | 0                       | 400                   | NA                        | 396                       |
| 2   | 2015 | Q2      | 3,283                      | 3,238              | 591                     | 0                        | 0                       | 421                   | NA                        | 413                       |
| 3   | 2015 | Q3      | Not redrawn                | Not redrawn        | 400                     | 0                        | 0                       | 421                   | 49                        | 412                       |
| 4   | 2015 | Q4      | Not redrawn                | Not redrawn        | NR                      | NR                       | NR                      | 421                   | 0                         | 414                       |
| 5   | 2016 | Q1      | 3,248                      | 3,210              | 591                     | 0                        | 0                       | 425                   | NA                        | 413                       |
| 6   | 2016 | Q2      | Not redrawn                | Not redrawn        | P                       | P                        | P                       | 470                   | 45                        | 459                       |
| 7   | 2016 | Q3      | Not redrawn                | Not redrawn        | 400                     | 0                        | 0                       | 470                   | 53                        | 462                       |
| 8   | 2016 | Q4      | Not redrawn                | Not redrawn        | NR                      | NR                       | NR                      | 470                   | 0                         | 457                       |
| 9   | 2017 | Q1      | 3,218                      | 3,200              | 595                     | 0                        | 25                      | 319                   | NA                        | 310                       |
| 10  | 2017 | Q2      | Not redrawn                | Not redrawn        | NR                      | NR                       | NR                      | 319                   | 0                         | 307                       |
| 11  | 2017 | Q3      | Not redrawn                | Not redrawn        | 385                     | 580                      | 25                      | 319                   | 95                        | 308                       |
| 12  | 2017 | Q4      | Not redrawn                | Not redrawn        | 584                     | 0                        | 25                      | 319                   | 15                        | 308                       |
| 13  | 2018 | Q1      | 3,209                      | 3,175              | 578                     | 580                      | 25                      | 319                   | NA                        | 310                       |
| 14  | 2018 | Q2      | Not redrawn                | Not redrawn        | 584                     | 0                        | 25                      | 319                   | 2                         | 309                       |
| 15  | 2018 | Q3      | Not redrawn                | Not redrawn        | 400                     | 200                      | 25                      | 319                   | 63                        | 311                       |
| 16  | 2018 | Q4      | Not redrawn                | Not redrawn        | NR                      | NR                       | NR                      | 96                    | 0                         | 96                        |
| 17  | 2019 | Q1      | 3,173                      | 3,125              | 589                     | 0                        | 25                      | 125                   | NA                        | 125                       |
| 18  | 2019 | Q2      | Not redrawn                | Not redrawn        | P                       | 1                        | 25                      | 125                   | 1                         | 126                       |
| 19  | 2019 | Q3      | Not redrawn                | Not redrawn        | 400                     | 0                        | 25                      | 125                   | 23                        | 129                       |

**FOOTNOTES**

**IQR** = CMS Hospital Inpatient Quality Reporting Program  
**IHS** = Indian Health Service  
**FEMA** = Federal Emergency Management Agency

**1** Only Acute Care hospitals are drawn from the database and used for MPSMS  
**NA** Not applicable; a new list of hospitals was drawn in that quarter  
**NR** No resampling done in that quarter; no additional hospitals were needed in the sample  
**P** Previous quarter's data was used for resampling, without modification

**eTable 2.** Percent of Overall Sample Represented by Each Condition, 2010-2019

Summarizes data contributing to the Table in the main article

**Percent of Overall All-Condition Sample Represented by Each Condition, 2010-2019**

| Condition            | 2010  |      | 2011  |      | 2012  |      | 2013  |      | 2014  |      | 2015  |      | 2016  |      | 2017  |      | 2018  |      | 2019  |      | Total  |      |
|----------------------|-------|------|-------|------|-------|------|-------|------|-------|------|-------|------|-------|------|-------|------|-------|------|-------|------|--------|------|
| AMI                  | 7727  | 23%  | 7113  | 21%  | 4934  | 13%  | 4027  | 17%  | 4234  | 18%  | 4076  | 23%  | 3797  | 14%  | 2651  | 12%  | 1681  | 11%  | 567   | 6%   | 40807  | 17%  |
| HF                   | 7536  | 22%  | 6962  | 20%  | 4900  | 13%  | 4492  | 19%  | 4820  | 20%  | 2423  | 14%  | 5330  | 19%  | 3779  | 17%  | 1739  | 12%  | 774   | 8%   | 42755  | 17%  |
| Pneumonia            | 9311  | 28%  | 9744  | 29%  | 8730  | 24%  | 4666  | 20%  | 4941  | 21%  | 2427  | 14%  | 5737  | 21%  | 4004  | 18%  | 1707  | 11%  | 858   | 8%   | 52125  | 21%  |
| SCIP                 | 9104  | 27%  | 10148 | 30%  | 8692  | 24%  | 4767  | 21%  | 5480  | 23%  | 2817  | 16%  | 5920  | 21%  | 3880  | 17%  | 1930  | 13%  | 1861  | 18%  | 54599  | 22%  |
| All-Other Conditions |       |      |       |      | 9532  | 26%  | 5286  | 23%  | 4308  | 18%  | 6072  | 34%  | 7114  | 26%  | 7912  | 36%  | 7895  | 53%  | 6139  | 60%  | 54258  | 22%  |
| <b>Total</b>         | 33678 | 100% | 33967 | 100% | 36788 | 100% | 23238 | 100% | 23783 | 100% | 17815 | 101% | 27898 | 101% | 22226 | 100% | 14952 | 100% | 10199 | 100% | 244544 | 100% |

**Percent of Overall Four-Condition Sample Represented by Each Condition, 2010-2019**

| Condition    | 2010  |      | 2011  |      | 2012  |      | 2013  |      | 2014  |      | 2015  |      | 2016  |      | 2017  |      | 2018 |      | 2019 |      | Total  |      |
|--------------|-------|------|-------|------|-------|------|-------|------|-------|------|-------|------|-------|------|-------|------|------|------|------|------|--------|------|
| AMI          | 7727  | 23%  | 7113  | 21%  | 4934  | 18%  | 4027  | 22%  | 4234  | 22%  | 4076  | 35%  | 3797  | 18%  | 2651  | 19%  | 1681 | 24%  | 567  | 14%  | 40807  | 21%  |
| HF           | 7536  | 22%  | 6962  | 20%  | 4900  | 18%  | 4492  | 25%  | 4820  | 25%  | 2423  | 21%  | 5330  | 26%  | 3779  | 26%  | 1739 | 25%  | 774  | 19%  | 42755  | 22%  |
| Pneumonia    | 9311  | 28%  | 9744  | 29%  | 8730  | 32%  | 4666  | 26%  | 4941  | 25%  | 2427  | 21%  | 5737  | 28%  | 4004  | 28%  | 1707 | 24%  | 858  | 21%  | 52125  | 27%  |
| SCIP         | 9104  | 27%  | 10148 | 30%  | 8692  | 32%  | 4767  | 27%  | 5480  | 28%  | 2817  | 24%  | 5920  | 28%  | 3880  | 27%  | 1930 | 27%  | 1861 | 46%  | 54599  | 29%  |
| <b>Total</b> | 33678 | 100% | 33967 | 100% | 27256 | 100% | 17952 | 100% | 19475 | 100% | 11743 | 101% | 20784 | 100% | 14314 | 100% | 7057 | 100% | 4060 | 100% | 190286 | 100% |

**eTable 3.** Summary National Inpatient Mortality and Length-of-Stay Data from HCUPnet (<https://hcupnet.ahrq.gov/#setup>), 2010-2017

| HCUPnet - Hospital Inpatient National Statistics                                                                                                                                                                             |      |      |      |      |      |      |      |      |
|------------------------------------------------------------------------------------------------------------------------------------------------------------------------------------------------------------------------------|------|------|------|------|------|------|------|------|
| Analysis Type: Trends   Setting of Care: Hospital Inpatient   Geographic Settings: National   Categorization Type: All Stays   Principal or All-Listed: Principal   Outcome and Measures: Number, Rate, Length of stay, Died |      |      |      |      |      |      |      |      |
| National                                                                                                                                                                                                                     | 2010 | 2011 | 2012 | 2013 | 2014 | 2015 | 2016 | 2017 |
| Outcomes for All Discharges                                                                                                                                                                                                  |      |      |      |      |      |      |      |      |
| LOS (length of stay), days (mean)                                                                                                                                                                                            | 4.58 | 4.53 | 4.51 | 4.55 | 4.61 | 4.62 | 4.62 | 4.62 |
| In-hospital deaths: %                                                                                                                                                                                                        | 1.86 | 1.87 | 1.84 | 1.89 | 1.90 | 1.91 | 1.91 | 1.95 |

| Analysis Type: Trends   Setting of Care: Hospital Inpatient   Geographic Settings: National   Subgroups of Interest: Non-neonatal, non-maternal discharges only, Children only (age 0-17)   Categorization Type: All Stays   Principal or All-Listed: Principal   Outcome and Measures: Number, Rate, Length of stay, Died |      |      |      |      |      |      |      |      |
|----------------------------------------------------------------------------------------------------------------------------------------------------------------------------------------------------------------------------------------------------------------------------------------------------------------------------|------|------|------|------|------|------|------|------|
| National, Non-neonatal, non-maternal discharges only                                                                                                                                                                                                                                                                       | 2010 | 2011 | 2012 | 2013 | 2014 | 2015 | 2016 | 2017 |
| Outcomes for All Discharges                                                                                                                                                                                                                                                                                                |      |      |      |      |      |      |      |      |
| LOS (length of stay), days (mean)                                                                                                                                                                                                                                                                                          | 4.94 | 4.91 | 4.89 | 4.95 | 5.04 | 5.06 | 5.03 | 5.02 |
| In-hospital deaths: %                                                                                                                                                                                                                                                                                                      | 2.32 | 2.33 | 2.32 | 2.39 | 2.41 | 2.41 | 2.41 | 2.45 |



**eTable 4.** Patient Characteristics, Hospital Characteristics, and Outcomes for Combined AMI, HF, Pneumonia, and Surgical Care (Four Conditions) Patients, 2010-2019

| <b>Four Condition<br/>(N=190,286)</b>  | <b>2019<br/>(N=4,060)</b> | <b>2018<br/>(N=7,057)</b> | <b>2017<br/>(N=14,314)</b> | <b>2016<br/>(N=20,784)</b> | <b>2015<br/>(N=11,743)</b> | <b>2014<br/>(N=19,475)</b> | <b>2013<br/>(N=17,952)</b> | <b>2012<br/>(N=27,256)</b> | <b>2011<br/>(N=33,967)</b> | <b>2010<br/>(N=33,678)</b> |
|----------------------------------------|---------------------------|---------------------------|----------------------------|----------------------------|----------------------------|----------------------------|----------------------------|----------------------------|----------------------------|----------------------------|
| <b>Demographic</b>                     | Rate %                    |                           |                            |                            |                            |                            |                            |                            |                            |                            |
| Age, Mean (Standard Deviation [SD])    | 67.1<br>(15.4)            | 68.8<br>(15.3)            | 68.4 (15.7)                | 67.9 (15.8)                | 68.5 (15.2)                | 67.9 (15.6)                | 68.3 (15.7)                | 67.7 (16.1)                | 67.7 (16.3)                | 67.9 (16.3)                |
| Age <65                                | 39.7                      | 36.2                      | 37.6                       | 39.0                       | 38.2                       | 39.8                       | 38.0                       | 39.6                       | 40.1                       | 39.0                       |
| Age 65-74                              | 26.7                      | 25.2                      | 24.2                       | 24.0                       | 24.3                       | 23.4                       | 23.7                       | 22.3                       | 21.6                       | 21.7                       |
| Age 75-84                              | 21.4                      | 22.7                      | 21.7                       | 21.3                       | 21.1                       | 21.2                       | 21.9                       | 21.9                       | 21.7                       | 22.5                       |
| Age 85 and Over                        | 12.3                      | 15.9                      | 16.4                       | 15.6                       | 16.3                       | 15.6                       | 16.4                       | 16.2                       | 16.6                       | 16.9                       |
| Female                                 | 52.5                      | 50.4                      | 51.9                       | 51.7                       | 50.4                       | 50.6                       | 51.9                       | 54.0                       | 53.8                       | 54.0                       |
| Male                                   | 47.5                      | 49.6                      | 48.1                       | 48.3                       | 49.6                       | 49.4                       | 48.1                       | 46.0                       | 46.2                       | 46.0                       |
| American Indian/<br>Native             | 1.1                       | 0.8                       | 0.6                        | 0.9                        | 0.7                        | 0.8                        | 0.8                        | 0.9                        | 0.7                        | 0.4                        |
| Asian                                  | 1.6                       | 1.5                       | 1.6                        | 1.5                        | 1.7                        | 1.5                        | 1.9                        | 1.7                        | 1.8                        | 1.7                        |
| Black (Non-Hispanic)                   | 13.6                      | 11.5                      | 11.2                       | 12.5                       | 12.3                       | 12.1                       | 11.9                       | 12.2                       | 12.0                       | 12.0                       |
| Hispanic                               | 5.4                       | 6.5                       | 5.5                        | 5.6                        | 5.3                        | 5.5                        | 6.3                        | 5.4                        | 5.4                        | 5.7                        |
| Native<br>Hawaiian/Pacific<br>Islander | 0.2                       | 0.2                       | 0.3                        | 0.2                        | 0.1                        | 0.2                        | 0.1                        | 0.1                        | 0.1                        | 0.1                        |
| White (Non-Hispanic)                   | 74.7                      | 77.1                      | 78.7                       | 77.1                       | 78.0                       | 77.7                       | 77.1                       | 77.6                       | 77.8                       | 77.8                       |
| Other <sup>3</sup>                     | 3.4                       | 2.4                       | 2.1                        | 2.2                        | 2.0                        | 2.2                        | 1.8                        | 2.1                        | 2.2                        | 2.3                        |
| <b>Risk Factor</b>                     |                           |                           |                            |                            |                            |                            |                            |                            |                            |                            |
| Obesity                                | 40.8                      | 38.2                      | 38.5                       | 37.1                       | 35.1                       | 32.4                       | 29.6                       | 27.8                       | 25.2                       | 22.7                       |
| Smoking                                | 30.3                      | 31.0                      | 29.3                       | 28.4                       | 27.6                       | 26.7                       | 25.5                       | 24.9                       | 24.2                       | 23.5                       |
| Corticosteroids                        | 6.7                       | 7.8                       | 7.7                        | 7.1                        | 6.8                        | 6.9                        | 7.1                        | 7.7                        | 7.3                        | 6.9                        |
| <b>Comorbidity</b>                     |                           |                           |                            |                            |                            |                            |                            |                            |                            |                            |
| Coronary Artery<br>Disease             | 40.6                      | 51.4                      | 49.5                       | 46.4                       | 57.1                       | 50.7                       | 52.2                       | 46.9                       | 50.7                       | 52.8                       |
| Congestive Heart<br>Failure            | 34.8                      | 45.7                      | 45.3                       | 43.8                       | 43.2                       | 43.5                       | 44.3                       | 38.1                       | 41.0                       | 43.0                       |
| Diabetes Mellitus                      | 33.8                      | 38.7                      | 37.1                       | 37.4                       | 38.1                       | 36.9                       | 37.2                       | 34.8                       | 35.9                       | 35.8                       |
| Kidney Disease                         | 30.5                      | 35.7                      | 35.2                       | 32.1                       | 31.3                       | 31.6                       | 31.0                       | 27.6                       | 26.7                       | 27.0                       |

<sup>3</sup> Other race includes any identified race not included in the aforementioned categories and mixed race.

| <b>Four Condition<br/>(N=190,286)</b>    | <b>2019<br/>(N=4,060)</b> | <b>2018<br/>(N=7,057)</b> | <b>2017<br/>(N=14,314)</b> | <b>2016<br/>(N=20,784)</b> | <b>2015<br/>(N=11,743)</b> | <b>2014<br/>(N=19,475)</b> | <b>2013<br/>(N=17,952)</b> | <b>2012<br/>(N=27,256)</b> | <b>2011<br/>(N=33,967)</b> | <b>2010<br/>(N=33,678)</b> |
|------------------------------------------|---------------------------|---------------------------|----------------------------|----------------------------|----------------------------|----------------------------|----------------------------|----------------------------|----------------------------|----------------------------|
| Chronic Obstructive Pulmonary Disease    | 25.7                      | 29.6                      | 30.5                       | 30.7                       | 29.8                       | 29.9                       | 31.0                       | 30.7                       | 30.9                       | 30.9                       |
| Cancer                                   | 19.8                      | 19.0                      | 19.9                       | 18.8                       | 18.2                       | 19.8                       | 19.1                       | 19.9                       | 19.4                       | 19.5                       |
| Cerebrovascular Disease                  | 13.7                      | 15.7                      | 16.2                       | 15.2                       | 15.5                       | 15.8                       | 16.2                       | 15.4                       | 16.7                       | 16.5                       |
| <b>Outcomes</b>                          |                           |                           |                            |                            |                            |                            |                            |                            |                            |                            |
| Length of stay, Mean (SD)                | 4.7 (5.4)                 | 4.7 (4.9)                 | 4.6 (5.0)                  | 4.5 (4.9)                  | 4.5 (4.6)                  | 4.9 (5.0)                  | 5.0 (5.4)                  | 5.1 (5.2)                  | 5.0 (5.3)                  | 5.2 (5.6)                  |
| In-hospital Mortality                    | 2.7                       | 3.7                       | 3.8                        | 3.5                        | 3.8                        | 4.2                        | 4.3                        | 4.6                        | 4.5                        | 4.6                        |
| <b>Hospital Characteristics</b>          |                           |                           |                            |                            |                            |                            |                            |                            |                            |                            |
| JC Accredited <sup>4</sup>               | 81.3                      | 77.6                      | 79.0                       | 79.4                       | 80.7                       | 78.8                       | 79.3                       | 82.3                       | 81.8                       | 82.1                       |
| Private Not for profit                   | 66.4                      | 68.0                      | 66.5                       | 61.9                       | 59.2                       | 60.6                       | 62.4                       | 60.2                       | 60.1                       | 63.2                       |
| PCI <sup>5</sup>                         | 57.2                      | 50.8                      | 48.8                       | 49.1                       | 46.6                       | 51.5                       | 48.6                       | 42.5                       | 43.4                       | 45.7                       |
| CABG <sup>6</sup>                        | 40.4                      | 36.0                      | 34.2                       | 32.7                       | 31.8                       | 38.2                       | 36.3                       | 33.3                       | 32.7                       | 35.2                       |
| Rural                                    | 29.0                      | 28.3                      | 30.5                       | 31.1                       | 28.4                       | 28.5                       | 27.7                       | 31.3                       | 29.8                       | 27.7                       |
| Large Teaching                           | 8.4                       | 8.2                       | 7.8                        | 8.8                        | 7.0                        | 7.9                        | 7.9                        | 8.1                        | 8.0                        | 8.9                        |
| Beds, Median (Interquartile range [IQR]) | 169.0 (91.0 - 322.0)      | 174.0 (87.0- 312.0)       | 162.0 (80.0- 312.0)        | 142.0 (78.0- 269.0)        | 154.0 (72.0- 275.0)        | 172.0 (85.0- 306.0)        | 168.0 (85.0- 301.0)        | 155.0 (80.0- 277.0)        | 159.0 (80.0- 279.0)        | 174.0 (87.0- 313.0)        |

<sup>4</sup> JC: Joint Commission

<sup>5</sup> PCI: Percutaneous coronary intervention

<sup>6</sup> CABG: Coronary artery bypass graft surgery

**eTable 5.** Patient Characteristics, Hospital Characteristics, and Outcomes for All-Other Conditions<sup>7</sup> Patients, 2012-2019

| All-Other Conditions (N=54,256)       | 2019<br>(N=6,139) | 2018<br>(N=7,895) | 2017<br>(N=7,910) | 2016<br>(N=7,114) | 2015<br>(N=6,072) | 2014<br>(N=4,308) | 2013<br>(N=5,286) | 2012<br>(N=9,532) |
|---------------------------------------|-------------------|-------------------|-------------------|-------------------|-------------------|-------------------|-------------------|-------------------|
| <b>Demographic</b>                    | Rate (%)          |                   |                   |                   |                   |                   |                   |                   |
| Age, Mean (SD)                        | 59.1 (20.2)       | 58.6 (20.5)       | 58.6 (20.7)       | 58.2 (20.7)       | 57.3 (21.2)       | 55.8 (20.8)       | 56.5 (20.4)       | 56.9 (20.6)       |
| Age <65                               | 54.5              | 55.4              | 56.0              | 56.6              | 58.1              | 61.0              | 60.6              | 60.1              |
| Age 65-74                             | 20.1              | 19.2              | 18.3              | 17.9              | 16.9              | 16.4              | 16.7              | 16.3              |
| Age 75-84                             | 15.4              | 15.3              | 15.4              | 14.7              | 14.6              | 14.4              | 14.3              | 14.1              |
| Age 85 and Over                       | 10.0              | 10.1              | 10.4              | 10.8              | 10.5              | 8.1               | 8.3               | 9.5               |
| Female                                | 59.0              | 58.8              | 59.1              | 58.9              | 61.3              | 61.0              | 60.5              | 60.8              |
| Male                                  | 41.0              | 41.2              | 40.9              | 41.1              | 38.7              | 39.0              | 39.5              | 39.2              |
| American Indian/ Native               | 2.0               | 1.2               | 1.3               | 1.2               | 1.6               | 2.2               | 1.9               | 1.3               |
| Asian                                 | 2.0               | 2.2               | 1.8               | 2.2               | 2.1               | 1.7               | 1.6               | 1.6               |
| Black (Non-Hispanic)                  | 13.9              | 13.3              | 13.3              | 11.7              | 13.5              | 12.3              | 12.1              | 12.4              |
| Hispanic                              | 7.1               | 7.5               | 7.3               | 7.2               | 7.9               | 7.2               | 7.3               | 6.6               |
| Native Hawaiian/Pacific Islander      | 0.1               | 0.1               | 0.2               | 0.1               | 0.1               | 0.1               | 0.1               | 0.1               |
| White (Non-Hispanic)                  | 71.6              | 72.5              | 73.5              | 74.9              | 72.2              | 73.9              | 74.4              | 75.4              |
| Other <sup>8</sup>                    | 3.2               | 3.2               | 2.7               | 2.7               | 2.6               | 2.6               | 2.5               | 2.6               |
| <b>Risk Factor</b>                    |                   |                   |                   |                   |                   |                   |                   |                   |
| Obesity                               | 35.1              | 34.6              | 33.0              | 30.9              | 29.6              | 27.5              | 26.9              | 23.9              |
| Smoking                               | 31.8              | 33.2              | 31.6              | 30.6              | 29.3              | 29.5              | 27.9              | 27.2              |
| Corticosteroids                       | 6.5               | 6.8               | 6.1               | 6.7               | 6.0               | 5.6               | 5.5               | 5.5               |
| <b>Comorbidity</b>                    |                   |                   |                   |                   |                   |                   |                   |                   |
| Diabetes Mellitus                     | 30.4              | 30.5              | 29.8              | 28.6              | 29.5              | 27.2              | 25.9              | 26.7              |
| Kidney Disease                        | 26.4              | 26.0              | 24.3              | 22.0              | 21.8              | 17.8              | 17.9              | 15.7              |
| Coronary Artery Disease               | 22.0              | 23.7              | 23.6              | 22.3              | 22.7              | 22.2              | 21.2              | 21.6              |
| Chronic Obstructive Pulmonary Disease | 19.9              | 19.5              | 20.8              | 20.2              | 20.0              | 17.3              | 16.6              | 17.8              |
| Congestive Heart Failure              | 17.3              | 17.7              | 17.4              | 16.6              | 16.0              | 14.3              | 13.8              | 12.8              |
| Cancer                                | 16.4              | 16.8              | 16.8              | 17.4              | 15.8              | 14.6              | 14.6              | 15.2              |
| Cerebrovascular Disease               | 14.5              | 15.1              | 14.8              | 14.5              | 13.9              | 14.0              | 12.8              | 13.0              |
| <b>Outcomes</b>                       |                   |                   |                   |                   |                   |                   |                   |                   |

<sup>7</sup> All Other Conditions Data was not available prior to 2012

<sup>8</sup> Other race includes any identified race not included in the aforementioned categories and mixed race.

| <b>All-Other Conditions (N=54,256)</b> | <b>2019<br/>(N=6,139)</b> | <b>2018<br/>(N=7,895)</b> | <b>2017<br/>(N=7,910)</b> | <b>2016<br/>(N=7,114)</b> | <b>2015<br/>(N=6,072)</b> | <b>2014<br/>(N=4,308)</b> | <b>2013<br/>(N=5,286)</b> | <b>2012<br/>(N=9,532)</b> |
|----------------------------------------|---------------------------|---------------------------|---------------------------|---------------------------|---------------------------|---------------------------|---------------------------|---------------------------|
| Length of stay, Mean (SD)              | 4.1 (5.1)                 | 4.0 (4.4)                 | 4.0 (4.4)                 | 3.9 (4.4)                 | 3.9 (4.2)                 | 3.7 (4.1)                 | 3.8 (4.4)                 | 3.8 (4.3)                 |
| In-hospital Mortality                  | 1.7                       | 2.0                       | 2.1                       | 2.2                       | 1.6                       | 1.4                       | 1.3                       | 1.2                       |
| <b>Hospital Characteristics</b>        |                           |                           |                           |                           |                           |                           |                           |                           |
| JC Accredited <sup>9</sup>             | 78.8                      | 80.1                      | 79.3                      | 77.9                      | 78.9                      | 74.5                      | 71.6                      | 76.5                      |
| Private Not for profit                 | 61.1                      | 63.0                      | 61.7                      | 62.8                      | 63.4                      | 57.1                      | 53.8                      | 52.3                      |
| PCI <sup>10</sup>                      | 43.4                      | 46.1                      | 43.9                      | 44.6                      | 46.3                      | 44.7                      | 37.5                      | 32.6                      |
| CABG <sup>11</sup>                     | 30.3                      | 32.9                      | 31.5                      | 31.0                      | 33.1                      | 31.9                      | 27.8                      | 25.4                      |
| Rural                                  | 29.1                      | 27.4                      | 29.7                      | 32.6                      | 31.6                      | 30.7                      | 27.3                      | 31.4                      |
| Large Teaching                         | 7.0                       | 6.8                       | 6.3                       | 5.3                       | 6.7                       | 6.8                       | 6.0                       | 5.9                       |
| Beds, Median (IQR)                     | 149.0 (72.0-312.0)        | 159.0 (73.0-301.0)        | 150.0 (71.0-280.0)        | 144.0 (69.0-264.0)        | 153.0 (68.0-267.0)        | 139.5(55.0-269.0)         | 120.0 (44.0-260.0)        | 113.0 (45.0-228.0)        |

<sup>9</sup> JC: Joint Commission

<sup>10</sup> PCI: Percutaneous coronary intervention

<sup>11</sup> CABG: Coronary artery bypass graft surgery

**eTable 6.** Patient Characteristics, Hospital Characteristics, and Outcomes for AMI patients, 2010-2019

| <b>AMI Sample Patient Characteristics (N=40,807)</b> | <b>2010 (N=7,727)</b> | <b>2011 (N=7,113)</b> | <b>2012 (N=4,934)</b> | <b>2013 (N=4,027)</b> | <b>2014 (N=4,234)</b> | <b>2015 (N=4,076)</b> | <b>2016 (N=3,797)</b> | <b>2017 (N=2,651)</b> | <b>2018 (N=1,681)</b> | <b>2019 (N=567)</b> |
|------------------------------------------------------|-----------------------|-----------------------|-----------------------|-----------------------|-----------------------|-----------------------|-----------------------|-----------------------|-----------------------|---------------------|
| <b>Demographic</b>                                   | Rate (%)              |                       |                       |                       |                       |                       |                       |                       |                       |                     |
| Age, Mean (SD) <sup>12</sup>                         | 69.7<br>(14.9)        | 69.7<br>(14.9)        | 69.9<br>(14.9)        | 69.1<br>(14.6)        | 69.0<br>(14.5)        | 69.3<br>(14.5)        | 68.7<br>(14.5)        | 68.3<br>(14.6)        | 68.7<br>(14.5)        | 69.1<br>(14.4)      |
| Age <65                                              | 37.4                  | 37.5                  | 36.7                  | 38.4                  | 39.1                  | 37.9                  | 39.3                  | 40.6                  | 39.1                  | 37.9                |
| Age 65-74                                            | 21.3                  | 21.4                  | 21.8                  | 23.9                  | 23.3                  | 24.5                  | 24.3                  | 24.7                  | 24.5                  | 23.8                |
| Age 75-84                                            | 22.4                  | 21.5                  | 22.0                  | 20.0                  | 20.8                  | 19.7                  | 20.5                  | 18.3                  | 20.8                  | 22.9                |
| Age 85 and Over                                      | 18.9                  | 19.6                  | 19.6                  | 17.7                  | 16.7                  | 18.0                  | 15.9                  | 16.3                  | 15.6                  | 15.3                |
| Female                                               | 44.7                  | 43.5                  | 42.6                  | 42.3                  | 40.6                  | 42.1                  | 41.0                  | 42.2                  | 40.2                  | 45.7                |
| American Indian/<br>Native                           | 0.3                   | 0.4                   | 0.4                   | 0.7                   | 0.9                   | 0.5                   | 0.8                   | 0.6                   | 0.7                   | 0.7                 |
| Asian                                                | 2.1                   | 2.6                   | 2.2                   | 2.3                   | 2.1                   | 2.0                   | 2.2                   | 2.1                   | 2.2                   | 2.5                 |
| Black (Non-Hispanic)                                 | 9.7                   | 10.3                  | 11.0                  | 10.8                  | 10.4                  | 11.8                  | 11.3                  | 9.8                   | 10.5                  | 13.4                |
| Hispanic                                             | 6.6                   | 5.7                   | 5.9                   | 7.2                   | 7.3                   | 6.1                   | 6.3                   | 5.6                   | 6.8                   | 5.3                 |
| Native<br>Hawaiian/Pacific<br>Islander               | 0.2                   | 0.1                   | 0.2                   | 0.2                   | 0.1                   | 0.1                   | 0.2                   | 0.5                   | 0.5                   | 0.2                 |
| Other <sup>13</sup>                                  | 1.8                   | 1.5                   | 1.5                   | 1.8                   | 1.5                   | 1.9                   | 2.4                   | 2.5                   | 1.7                   | 2.6                 |
| White (Non-<br>Hispanic)                             | 79.3                  | 79.4                  | 78.7                  | 77.1                  | 77.6                  | 77.7                  | 76.7                  | 79.0                  | 77.6                  | 75.3                |
| <b>Rick factors</b>                                  |                       |                       |                       |                       |                       |                       |                       |                       |                       |                     |
| Corticosteroids                                      | 4.8                   | 5.6                   | 5.2                   | 4.5                   | 4.7                   | 4.6                   | 4.8                   | 5.1                   | 5.0                   | 3.5                 |
| Obesity                                              | 20.2                  | 23.0                  | 24.7                  | 26.5                  | 28.8                  | 31.9                  | 33.1                  | 34.3                  | 36.8                  | 39.5                |
| Smoking                                              | 28.6                  | 29.6                  | 30.0                  | 30.6                  | 31.6                  | 31.6                  | 33.9                  | 34.6                  | 35.9                  | 36.7                |
| <b>Comorbidities</b>                                 |                       |                       |                       |                       |                       |                       |                       |                       |                       |                     |
| Coronary Artery<br>Disease                           | 97.9                  | 98.3                  | 97.5                  | 97.7                  | 96.6                  | 95.9                  | 97.0                  | 98.0                  | 97.9                  | 98.2                |
| Diabetes Mellitus                                    | 39.8                  | 41.6                  | 40.5                  | 41.9                  | 41.2                  | 43.4                  | 42.9                  | 39.0                  | 44.1                  | 41.4                |
| Congestive Heart<br>Failure                          | 40.1                  | 41.4                  | 40.7                  | 40.3                  | 39.6                  | 40.5                  | 39.8                  | 41.5                  | 42.2                  | 37.4                |

<sup>12</sup> SD: Standard Deviation

<sup>13</sup> Other race includes any identified race not included in the listed categories and mixed race.

| <b>AMI Sample Patient Characteristics (N=40,807)</b> | <b>2010 (N=7,727)</b> | <b>2011 (N=7,113)</b> | <b>2012 (N=4,934)</b> | <b>2013 (N=4,027)</b> | <b>2014 (N=4,234)</b> | <b>2015 (N=4,076)</b> | <b>2016 (N=3,797)</b> | <b>2017 (N=2,651)</b> | <b>2018 (N=1,681)</b> | <b>2019 (N=567)</b> |
|------------------------------------------------------|-----------------------|-----------------------|-----------------------|-----------------------|-----------------------|-----------------------|-----------------------|-----------------------|-----------------------|---------------------|
| Kidney Disease                                       | 27.6                  | 29.3                  | 30.0                  | 30.5                  | 31.9                  | 32.3                  | 31.4                  | 33.7                  | 33.6                  | 31.6                |
| Chronic Obstructive Pulmonary Disease                | 23.3                  | 24.2                  | 24.4                  | 22.8                  | 21.6                  | 23.1                  | 22.7                  | 22.9                  | 21.8                  | 21.9                |
| Cerebrovascular Disease                              | 19.0                  | 20.6                  | 18.5                  | 17.9                  | 18.6                  | 17.7                  | 17.7                  | 18.2                  | 15.7                  | 17.8                |
| Cancer                                               | 14.0                  | 14.6                  | 15.4                  | 13.6                  | 15.6                  | 14.9                  | 14.7                  | 15.1                  | 14.8                  | 15.9                |
| <b>Outcomes</b>                                      |                       |                       |                       |                       |                       |                       |                       |                       |                       |                     |
| Length of stay, Mean (SD)                            | 4.2 (4.7)             | 4.1 (4.2)             | 4.1 (4.9)             | 4.0 (4.4)             | 4.0 (4.1)             | 3.9 (4.4)             | 3.5 (4.2)             | 3.6 (4.1)             | 3.7 (3.9)             | 3.7 (4.4)           |
| In-hospital Mortality                                | 6.1                   | 5.8                   | 6.3                   | 5.6                   | 5.4                   | 4.7                   | 5.0                   | 4.4                   | 4.7                   | 3.5                 |
| <b>Admitted Hospital Characteristics</b>             |                       |                       |                       |                       |                       |                       |                       |                       |                       |                     |
| Large Teaching                                       | 9.6                   | 9.4                   | 9.5                   | 8.9                   | 9.0                   | 9.1                   | 10.6                  | 9.2                   | 9.6                   | 9.7                 |
| Private Not for profit                               | 66.1                  | 65.2                  | 64.7                  | 66.1                  | 63.7                  | 63.4                  | 64.8                  | 70.6                  | 70.6                  | 66.0                |
| Rural                                                | 26.2                  | 27.6                  | 27.8                  | 24.0                  | 23.9                  | 24.2                  | 25.4                  | 22.3                  | 19.9                  | 22.2                |
| JC <sup>14</sup> Accredited                          | 84.1                  | 85.5                  | 86.2                  | 84.0                  | 83.2                  | 84.5                  | 84.1                  | 82.8                  | 82.3                  | 82.0                |
| PCI <sup>15</sup>                                    | 49.4                  | 50.3                  | 49.1                  | 55.3                  | 59.4                  | 56.3                  | 63.4                  | 61.8                  | 64.8                  | 71.3                |
| CABG <sup>16</sup>                                   | 38.5                  | 38.1                  | 38.8                  | 41.8                  | 44.6                  | 39.3                  | 43.5                  | 44.2                  | 46.0                  | 50.1                |
| Beds, Median (IQR) <sup>17</sup>                     | 189.0 (100.0-332.0)   | 182.0 (104.0-315.0)   | 181.0 (100.0-312.0)   | 192.0 (108.0-329.0)   | 200.0 (112.0-331.0)   | 185.0 (104.0-318.0)   | 185.0 (109.0-337.0)   | 208.0 (117.0-362.0)   | 214.0 (131.0-354.0)   | 209.0 (118.0-358.0) |

<sup>14</sup> JC: Joint Commission

<sup>15</sup> PCI: Percutaneous coronary intervention

<sup>16</sup> CABG: Coronary artery bypass graft surgery

<sup>17</sup> IQR: Interquartile Range

**eTable 7.** Patient Characteristics, Hospital Characteristics, and Outcomes for HF patients, 2010-2019

| <b>HF Sample Patient Characteristics (N=42,755)</b> | <b>2010 (N=7,536)</b> | <b>2011 (N=6,962)</b> | <b>2012 (N=4,900)</b> | <b>2013 (N=4,492)</b> | <b>2014 (N=4,820)</b> | <b>2015 (N=2,423)</b> | <b>2016 (N=5,330)</b> | <b>2017 (N=3,779)</b> | <b>2018 (N=1,739)</b> | <b>2019 (N=774)</b> |
|-----------------------------------------------------|-----------------------|-----------------------|-----------------------|-----------------------|-----------------------|-----------------------|-----------------------|-----------------------|-----------------------|---------------------|
| <b>Demographic</b>                                  | Rate (%)              |                       |                       |                       |                       |                       |                       |                       |                       |                     |
| Age, Mean (SD) <sup>18</sup>                        | 73.6 (14.2)           | 73.6 (14.3)           | 73.7 (14.3)           | 73.3 (14.2)           | 72.9 (14.5)           | 72.9 (14.2)           | 73.1 (14.4)           | 73.2 (14.3)           | 73.2 (14.5)           | 72.6 (14.0)         |
| Age <65                                             | 24.6                  | 25.7                  | 25.3                  | 24.9                  | 28.0                  | 26.3                  | 27.0                  | 26.3                  | 25.6                  | 27.6                |
| Age 65-74                                           | 21.2                  | 20.4                  | 21.0                  | 22.5                  | 21.2                  | 23.1                  | 21.7                  | 21.6                  | 21.7                  | 24.2                |
| Age 75-84                                           | 29.0                  | 28.3                  | 27.2                  | 28.3                  | 26.3                  | 27.2                  | 26.9                  | 27.2                  | 28.2                  | 26.0                |
| Age 85 and Over                                     | 25.2                  | 25.6                  | 26.4                  | 24.3                  | 24.5                  | 23.4                  | 24.4                  | 25.0                  | 24.4                  | 22.2                |
| Female                                              | 52.8                  | 51.3                  | 51.5                  | 50.7                  | 49.6                  | 49.3                  | 49.1                  | 48.8                  | 50.5                  | 48.1                |
| American Indian/ Native                             | 0.3                   | 0.7                   | 0.9                   | 0.7                   | 0.8                   | 0.7                   | 0.5                   | 0.7                   | 0.7                   | 1.3                 |
| Asian                                               | 1.5                   | 1.6                   | 1.5                   | 1.8                   | 1.6                   | 1.7                   | 1.3                   | 1.3                   | 1.4                   | 2.1                 |
| Black (Non-Hispanic)                                | 16.5                  | 16.8                  | 17.4                  | 15.3                  | 16.9                  | 17.5                  | 16.0                  | 15.3                  | 16.3                  | 19.9                |
| Hispanic                                            | 5.7                   | 5.5                   | 5.1                   | 6.4                   | 5.0                   | 4.7                   | 5.6                   | 5.2                   | 6.4                   | 5.0                 |
| Native Hawaiian/Pacific Islander                    | 0.2                   | 0.2                   | 0.2                   | 0.1                   | 0.2                   | 0.2                   | 0.4                   | 0.3                   | 0.1                   | 0.3                 |
| Other <sup>19</sup>                                 | 1.9                   | 1.5                   | 1.8                   | 1.3                   | 1.8                   | 1.6                   | 1.8                   | 1.4                   | 1.5                   | 2.3                 |
| White (Non-Hispanic)                                | 73.9                  | 73.7                  | 73.1                  | 74.4                  | 73.7                  | 73.8                  | 74.3                  | 75.8                  | 73.5                  | 69.1                |
| <b>Risk Factors</b>                                 |                       |                       |                       |                       |                       |                       |                       |                       |                       |                     |
| Corticosteroids                                     | 7.1                   | 7.1                   | 7.4                   | 7.0                   | 7.0                   | 6.6                   | 7.3                   | 8.1                   | 9.0                   | 8.0                 |
| Obesity                                             | 26.8                  | 28.6                  | 32.2                  | 33.0                  | 35.8                  | 38.1                  | 41.3                  | 43.3                  | 42.3                  | 46.3                |
| Smoking                                             | 18.5                  | 19.3                  | 20.4                  | 21.0                  | 23.6                  | 24.6                  | 27.0                  | 27.1                  | 28.8                  | 31.7                |
| <b>Comorbidities</b>                                |                       |                       |                       |                       |                       |                       |                       |                       |                       |                     |
| Congestive Heart Failure                            | 98.4                  | 98.8                  | 98.6                  | 98.7                  | 98.1                  | 98.5                  | 97.9                  | 98.1                  | 98.6                  | 96.9                |

<sup>18</sup> SD: Standard Deviation

<sup>19</sup> Other race includes any identified race not included in the listed categories and mixed race.

| <b>HF Sample Patient Characteristics (N=42,755)</b> | <b>2010 (N=7,536)</b> | <b>2011 (N=6,962)</b> | <b>2012 (N=4,900)</b> | <b>2013 (N=4,492)</b> | <b>2014 (N=4,820)</b> | <b>2015 (N=2,423)</b> | <b>2016 (N=5,330)</b> | <b>2017 (N=3,779)</b> | <b>2018 (N=1,739)</b> | <b>2019 (N=774)</b> |
|-----------------------------------------------------|-----------------------|-----------------------|-----------------------|-----------------------|-----------------------|-----------------------|-----------------------|-----------------------|-----------------------|---------------------|
| Coronary Artery Disease                             | 64.0                  | 65.1                  | 62.9                  | 61.7                  | 60.8                  | 61.0                  | 57.9                  | 61.0                  | 58.8                  | 56.6                |
| Kidney Disease                                      | 46.0                  | 47.0                  | 50.6                  | 50.3                  | 51.2                  | 50.3                  | 53.4                  | 56.7                  | 57.0                  | 55.7                |
| Diabetes Mellitus                                   | 49.3                  | 49.9                  | 50.0                  | 49.8                  | 51.0                  | 50.2                  | 50.8                  | 50.7                  | 50.9                  | 50.8                |
| Chronic Obstructive Pulmonary Disease               | 41.7                  | 42.9                  | 42.2                  | 41.6                  | 39.9                  | 42.6                  | 42.9                  | 42.9                  | 40.7                  | 39.3                |
| Cancer                                              | 18.0                  | 17.8                  | 16.9                  | 17.7                  | 17.9                  | 17.8                  | 17.6                  | 20.1                  | 18.4                  | 19.5                |
| Cerebrovascular Disease                             | 21.2                  | 22.4                  | 20.6                  | 21.7                  | 20.3                  | 18.6                  | 20.4                  | 20.5                  | 21.5                  | 18.7                |
| <b>Outcomes</b>                                     |                       |                       |                       |                       |                       |                       |                       |                       |                       |                     |
| Length of stay, Mean (SD)                           | 4.7 (4.3)             | 4.6 (4.0)             | 4.6 (3.8)             | 4.7 (4.2)             | 4.8 (4.2)             | 4.5 (3.8)             | 4.5 (4.0)             | 4.5 (4.1)             | 4.6 (4.4)             | 4.5 (3.8)           |
| In-hospital Mortality                               | 2.8                   | 3.3                   | 4.0                   | 3.1                   | 2.9                   | 2.6                   | 2.5                   | 2.9                   | 2.3                   | 2.5                 |
| <b>Admitted Hospital Characteristics</b>            |                       |                       |                       |                       |                       |                       |                       |                       |                       |                     |
| Large Teaching                                      | 8.7                   | 8.0                   | 7.9                   | 7.9                   | 7.9                   | 6.9                   | 8.4                   | 7.7                   | 7.5                   | 8.0                 |
| Private Not for profit                              | 63.0                  | 61.6                  | 61.4                  | 63.9                  | 63.2                  | 61.0                  | 63.1                  | 67.3                  | 67.6                  | 65.4                |
| Rural                                               | 28.7                  | 33.0                  | 33.8                  | 30.4                  | 31.6                  | 32.9                  | 33.8                  | 33.4                  | 32.8                  | 31.3                |
| JC <sup>20</sup> Accredited                         | 81.6                  | 81.3                  | 81.4                  | 78.3                  | 79.0                  | 79.8                  | 78.7                  | 79.0                  | 75.7                  | 78.9                |
| PCI <sup>21</sup>                                   | 45.8                  | 43.8                  | 43.3                  | 48.6                  | 51.7                  | 45.5                  | 48.4                  | 46.6                  | 47.1                  | 55.9                |
| CABG <sup>22</sup>                                  | 35.0                  | 32.9                  | 33.9                  | 36.5                  | 38.5                  | 30.7                  | 32.1                  | 32.8                  | 33.2                  | 38.8                |
| Beds, Median (IQR) <sup>23</sup>                    | 175.0 (87.0-314.0)    | 160.0 (82.0-282.0)    | 155.0 (82.0-279.0)    | 168.0 (86.0-301.0)    | 174.0 (86.0-308.0)    | 149.0 (72.0-273.0)    | 140.0 (76.0-268.0)    | 156.0 (78.0-303.0)    | 161.0 (83.0-295.0)    | 167.0 (91.0-315.0)  |

<sup>20</sup> JC: Joint Commission

<sup>21</sup> PCI: Percutaneous coronary intervention

<sup>22</sup> CABG: Coronary artery bypass graft surgery

<sup>23</sup> IQR: Interquartile Range



**eTable 8.** Patient Characteristics, Hospital Characteristics, and Outcomes for Pneumonia patients, 2010-2019

| <b>Pneumonia Sample Patient Characteristics (N=52,125)</b> | <b>2010 (N=9,311)</b> | <b>2011 (N=9,744)</b> | <b>2012 (N=8,730)</b> | <b>2013 (N=4,666)</b> | <b>2014 (N=4,941)</b> | <b>2015 (N=2,427)</b> | <b>2016 (N=5,737)</b> | <b>2017 (N=4,004)</b> | <b>2018 (N=1,707)</b> | <b>2019 (N=858)</b> |
|------------------------------------------------------------|-----------------------|-----------------------|-----------------------|-----------------------|-----------------------|-----------------------|-----------------------|-----------------------|-----------------------|---------------------|
| <b>Demographic</b>                                         | Rate (%)              |                       |                       |                       |                       |                       |                       |                       |                       |                     |
| Age, Mean (SD) <sup>24</sup>                               | 68.6<br>(17.1)        | 68.9<br>(16.9)        | 69.0<br>(16.7)        | 68.5<br>(16.9)        | 68.5<br>(16.7)        | 69.5<br>(16.3)        | 68.3<br>(16.9)        | 68.9<br>(16.7)        | 69.2<br>(16.3)        | 67.7<br>(16.6)      |
| Age <65                                                    | 36.3                  | 36.3                  | 35.7                  | 36.7                  | 36.7                  | 35.0                  | 37.5                  | 35.9                  | 34.6                  | 39.2                |
| Age 65-74                                                  | 21.2                  | 20.6                  | 21.1                  | 22.2                  | 22.7                  | 20.9                  | 22.3                  | 22.1                  | 23.1                  | 23.9                |
| Age 75-84                                                  | 23.4                  | 23.5                  | 24.4                  | 22.6                  | 22.8                  | 25.1                  | 22.0                  | 23.2                  | 24.0                  | 20.7                |
| Age 85 and Over                                            | 19.1                  | 19.6                  | 18.9                  | 18.5                  | 17.8                  | 19.0                  | 18.1                  | 18.9                  | 18.4                  | 16.2                |
| Female                                                     | 51.9                  | 52.0                  | 52.9                  | 52.2                  | 50.4                  | 53.2                  | 51.1                  | 54.1                  | 50.7                  | 49.1                |
| American Indian/ Native                                    | 0.6                   | 1.0                   | 1.3                   | 1.3                   | 1.0                   | 1.0                   | 1.2                   | 0.6                   | 1.3                   | 2.2                 |
| Asian                                                      | 1.6                   | 1.8                   | 1.9                   | 2.0                   | 1.5                   | 1.7                   | 1.4                   | 1.6                   | 1.4                   | 1.4                 |
| Black (Non-Hispanic)                                       | 11.7                  | 11.4                  | 11.7                  | 11.5                  | 11.3                  | 10.7                  | 12.2                  | 10.8                  | 10.8                  | 14.0                |
| Hispanic                                                   | 5.2                   | 5.2                   | 5.1                   | 6.0                   | 5.4                   | 5.7                   | 5.3                   | 5.2                   | 5.7                   | 5.6                 |
| Native Hawaiian/Pacific Islander                           | 0.0                   | 0.1                   | 0.1                   | 0.1                   | 0.2                   | 0.1                   | 0.1                   | 0.2                   | 0.1                   | 0.2                 |
| Other <sup>25</sup>                                        | 2.0                   | 2.2                   | 2.1                   | 1.6                   | 2.1                   | 2.0                   | 1.9                   | 1.9                   | 2.1                   | 3.0                 |
| White (Non-Hispanic)                                       | 78.9                  | 78.3                  | 77.9                  | 77.5                  | 78.5                  | 78.8                  | 77.8                  | 79.7                  | 78.6                  | 73.5                |
| <b>Risk Factors</b>                                        |                       |                       |                       |                       |                       |                       |                       |                       |                       |                     |
| Corticosteroids                                            | 12.7                  | 13.2                  | 13.9                  | 13.7                  | 13.2                  | 15.0                  | 13.0                  | 13.3                  | 14.2                  | 14.8                |
| Obesity                                                    | 19.4                  | 20.3                  | 22.6                  | 24.4                  | 26.8                  | 28.1                  | 29.3                  | 31.7                  | 31.0                  | 31.4                |
| Smoking                                                    | 25.5                  | 26.5                  | 27.3                  | 28.8                  | 30.2                  | 30.7                  | 31.6                  | 32.3                  | 37.4                  | 36.1                |
| <b>Comorbidities</b>                                       |                       |                       |                       |                       |                       |                       |                       |                       |                       |                     |
| Chronic Obstructive Pulmonary Disease                      | 46.3                  | 46.7                  | 45.8                  | 46.2                  | 47.0                  | 47.5                  | 44.1                  | 40.5                  | 45.6                  | 44.1                |
| Kidney Disease                                             | 29.0                  | 29.0                  | 30.5                  | 33.6                  | 34.4                  | 33.9                  | 34.4                  | 36.7                  | 39.4                  | 36.7                |
| Diabetes Mellitus                                          | 34.9                  | 35.4                  | 35.2                  | 35.2                  | 35.9                  | 34.8                  | 36.2                  | 35.7                  | 35.7                  | 35.7                |
| Congestive Heart Failure                                   | 34.3                  | 33.7                  | 32.2                  | 32.9                  | 33.5                  | 33.7                  | 33.0                  | 33.0                  | 36.3                  | 31.5                |
| Coronary Artery Disease                                    | 36.6                  | 36.8                  | 35.1                  | 35.1                  | 34.7                  | 33.2                  | 32.6                  | 35.3                  | 32.5                  | 30.7                |

<sup>24</sup> SD: Standard Deviation

<sup>25</sup> Other race includes any identified race not included in the listed categories and mixed race.

| <b>Pneumonia Sample Patient Characteristics (N=52,125)</b> | <b>2010 (N=9,311)</b> | <b>2011 (N=9,744)</b> | <b>2012 (N=8,730)</b> | <b>2013 (N=4,666)</b> | <b>2014 (N=4,941)</b> | <b>2015 (N=2,427)</b> | <b>2016 (N=5,737)</b> | <b>2017 (N=4,004)</b> | <b>2018 (N=1,707)</b> | <b>2019 (N=858)</b>   |
|------------------------------------------------------------|-----------------------|-----------------------|-----------------------|-----------------------|-----------------------|-----------------------|-----------------------|-----------------------|-----------------------|-----------------------|
| Cancer                                                     | 23.9                  | 22.2                  | 22.7                  | 22.5                  | 23.1                  | 23.1                  | 22.9                  | 24.5                  | 22.8                  | 23.3                  |
| Cerebrovascular Disease                                    | 18.3                  | 18.3                  | 17.9                  | 16.7                  | 17.7                  | 17.1                  | 16.5                  | 17.9                  | 17.7                  | 16.8                  |
| <b>Outcomes</b>                                            |                       |                       |                       |                       |                       |                       |                       |                       |                       |                       |
| Length of stay, Mean (SD)                                  | 6.2 (6.3)             | 5.9 (6.3)             | 5.8 (5.6)             | 6.1 (6.6)             | 5.9 (6.0)             | 5.5 (5.5)             | 5.5 (5.7)             | 5.6 (6.1)             | 5.7 (5.4)             | 5.7 (6.2)             |
| In-hospital Mortality                                      | 7.9                   | 7.7                   | 7.0                   | 7.1                   | 8.0                   | 6.8                   | 6.3                   | 7.0                   | 6.7                   | 6.2                   |
| <b>Admitted Hospital Characteristics</b>                   |                       |                       |                       |                       |                       |                       |                       |                       |                       |                       |
| Large Teaching                                             | 8.8                   | 7.8                   | 7.7                   | 7.5                   | 7.6                   | 6.1                   | 7.9                   | 7.1                   | 7.0                   | 7.2                   |
| Private Not for profit                                     | 63.5                  | 60.7                  | 59.5                  | 62.6                  | 61.8                  | 59.5                  | 61.9                  | 66.1                  | 67.4                  | 65.9                  |
| Rural                                                      | 29.3                  | 33.2                  | 34.7                  | 31.5                  | 33.6                  | 35.3                  | 34.9                  | 35.1                  | 33.7                  | 34.8                  |
| JC <sup>26</sup> Accredited                                | 81.2                  | 80.1                  | 80.6                  | 77.0                  | 77.2                  | 78.3                  | 77.0                  | 77.8                  | 72.8                  | 74.7                  |
| PCI <sup>27</sup>                                          | 44.9                  | 42.3                  | 41.1                  | 46.5                  | 49.5                  | 40.9                  | 44.8                  | 44.7                  | 43.6                  | 50.8                  |
| CABG <sup>28</sup>                                         | 34.6                  | 32.0                  | 32.1                  | 34.8                  | 36.8                  | 27.2                  | 29.5                  | 30.9                  | 30.4                  | 34.7                  |
| Beds, Median (IQR) <sup>29</sup>                           | 173.0<br>(85.0-312.0) | 155.5<br>(78.0-277.0) | 151.0<br>(77.0-267.0) | 159.0<br>(79.0-296.0) | 161.0<br>(77.0-297.0) | 131.0<br>(60.0-249.0) | 131.0<br>(69.0-251.0) | 148.0<br>(74.0-290.0) | 150.0<br>(72.0-279.0) | 150.0<br>(80.0-293.0) |

<sup>26</sup> JC: Joint Commission

<sup>27</sup> PCI: Percutaneous coronary intervention

<sup>28</sup> CABG: Coronary artery bypass graft surgery

<sup>29</sup> IQR: Interquartile Range

**eTable 9.** Patient Characteristics, Hospital Characteristics, and Outcomes for SCIP patients, 2010-2019

| <b>SCIP Sample Patient Characteristics (N=54,599)</b> | <b>2010 (N=9,104)</b> | <b>2011 (N=10,148)</b> | <b>2012 (N=8,692)</b> | <b>2013 (N=4,767)</b> | <b>2014 (N=5,480)</b> | <b>2015 (N=2,817)</b> | <b>2016 (N=5,920)</b> | <b>2017 (N=3,880)</b> | <b>2018 (N=1,930)</b> | <b>2019 (N=1,861)</b> |
|-------------------------------------------------------|-----------------------|------------------------|-----------------------|-----------------------|-----------------------|-----------------------|-----------------------|-----------------------|-----------------------|-----------------------|
| <b>Demographic</b>                                    | Rate (%)              |                        |                       |                       |                       |                       |                       |                       |                       |                       |
| Age, Mean (SD) <sup>30</sup>                          | 61.0 (16.0)           | 61.0 (15.6)            | 61.9 (15.4)           | 62.5 (15.1)           | 62.2 (14.5)           | 62.8 (14.3)           | 62.5 (14.9)           | 63.2 (15.0)           | 64.4 (14.5)           | 64.0 (14.9)           |
| Age <65                                               | 54.9                  | 55.4                   | 53.1                  | 51.2                  | 53.4                  | 51.7                  | 51.1                  | 48.6                  | 44.8                  | 45.4                  |
| Age 65-74                                             | 23.0                  | 23.7                   | 24.7                  | 26.3                  | 26.0                  | 28.0                  | 27.6                  | 28.6                  | 30.7                  | 29.9                  |
| Age 75-84                                             | 16.3                  | 15.6                   | 16.5                  | 16.7                  | 15.5                  | 14.7                  | 16.1                  | 17.2                  | 18.3                  | 19.3                  |
| Age 85 and Over                                       | 5.9                   | 5.4                    | 5.8                   | 5.7                   | 5.0                   | 5.6                   | 5.2                   | 5.7                   | 6.2                   | 5.4                   |
| Female                                                | 65.1                  | 64.3                   | 63.2                  | 60.9                  | 59.5                  | 61.0                  | 61.6                  | 59.3                  | 58.9                  | 58.0                  |
| American Indian/ Native                               | 0.4                   | 0.7                    | 0.7                   | 0.4                   | 0.5                   | 0.7                   | 0.8                   | 0.4                   | 0.6                   | 0.7                   |
| Asian                                                 | 1.5                   | 1.5                    | 1.4                   | 1.6                   | 1.0                   | 1.2                   | 1.3                   | 1.5                   | 1.0                   | 1.2                   |
| Black (Non-Hispanic)                                  | 10.7                  | 10.3                   | 10.3                  | 10.1                  | 9.9                   | 10.1                  | 10.3                  | 8.8                   | 8.7                   | 10.8                  |
| Hispanic                                              | 5.4                   | 5.3                    | 5.6                   | 5.8                   | 4.7                   | 4.2                   | 5.4                   | 6.2                   | 6.9                   | 5.4                   |
| Native Hawaiian/Pacific Islander                      | 0.1                   | 0.1                    | 0.1                   | 0.0                   | 0.1                   | 0.1                   | 0.1                   | 0.1                   | 0.2                   | 0.3                   |
| Other <sup>31</sup>                                   | 3.2                   | 3.1                    | 2.7                   | 2.6                   | 3.3                   | 2.5                   | 2.8                   | 2.5                   | 4.0                   | 4.4                   |
| White (Non-Hispanic)                                  | 78.8                  | 79.0                   | 79.2                  | 79.4                  | 80.5                  | 81.3                  | 79.2                  | 80.4                  | 78.5                  | 77.3                  |
| <b>Risk Factors</b>                                   |                       |                        |                       |                       |                       |                       |                       |                       |                       |                       |
| Corticosteroids                                       | 2.5                   | 2.8                    | 3.1                   | 3.0                   | 2.7                   | 3.2                   | 2.8                   | 3.4                   | 3.5                   | 3.4                   |
| Obesity                                               | 24.8                  | 28.9                   | 32.2                  | 34.2                  | 37.2                  | 43.2                  | 43.5                  | 43.6                  | 41.9                  | 43.2                  |
| Smoking                                               | 21.5                  | 21.6                   | 22.0                  | 22.1                  | 22.4                  | 21.7                  | 22.9                  | 24.8                  | 23.2                  | 25.1                  |
| <b>Comorbidities</b>                                  |                       |                        |                       |                       |                       |                       |                       |                       |                       |                       |
| Diabetes Mellitus                                     | 22.3                  | 22.8                   | 22.5                  | 23.2                  | 22.1                  | 23.0                  | 23.1                  | 23.9                  | 25.5                  | 23.5                  |

<sup>30</sup> SD: Standard Deviation

<sup>31</sup> Other race includes any identified race not included in the listed categories and mixed race.

| <b>SCIP Sample Patient Characteristics (N=54,599)</b> | <b>2010 (N=9,104)</b> | <b>2011 (N=10,148)</b> | <b>2012 (N=8,692)</b> | <b>2013 (N=4,767)</b> | <b>2014 (N=5,480)</b> | <b>2015 (N=2,817)</b> | <b>2016 (N=5,920)</b> | <b>2017 (N=3,880)</b> | <b>2018 (N=1,930)</b> | <b>2019 (N=1,861)</b> |
|-------------------------------------------------------|-----------------------|------------------------|-----------------------|-----------------------|-----------------------|-----------------------|-----------------------|-----------------------|-----------------------|-----------------------|
| Coronary Artery Disease                               | 21.6                  | 20.9                   | 21.2                  | 21.5                  | 20.9                  | 18.1                  | 17.0                  | 19.9                  | 21.1                  | 20.9                  |
| Cancer                                                | 21.0                  | 21.1                   | 21.4                  | 21.8                  | 21.8                  | 19.1                  | 18.6                  | 18.4                  | 19.8                  | 19.4                  |
| Kidney Disease                                        | 8.8                   | 8.9                    | 10.3                  | 10.8                  | 11.7                  | 11.5                  | 11.2                  | 13.9                  | 15.0                  | 16.8                  |
| Chronic Obstructive Pulmonary Disease                 | 12.7                  | 12.2                   | 12.6                  | 13.0                  | 12.2                  | 13.1                  | 12.0                  | 13.3                  | 12.3                  | 12.8                  |
| Congestive Heart Failure                              | 8.6                   | 8.2                    | 8.4                   | 7.5                   | 7.6                   | 7.7                   | 8.0                   | 9.1                   | 9.5                   | 9.7                   |
| Cerebrovascular Disease                               | 8.6                   | 8.3                    | 8.2                   | 8.9                   | 7.8                   | 8.3                   | 7.7                   | 9.0                   | 8.9                   | 9.0                   |
| <b>Outcomes</b>                                       |                       |                        |                       |                       |                       |                       |                       |                       |                       |                       |
| Length of stay, Mean (SD)                             | 5.4 (6.1)             | 5.0 (5.5)              | 5.2 (5.4)             | 5.1 (5.7)             | 4.8 (5.0)             | 4.4 (4.8)             | 4.3 (5.2)             | 4.4 (5.1)             | 4.6 (5.3)             | 4.6 (5.7)             |
| In-hospital Mortality                                 | 1.5                   | 1.5                    | 1.5                   | 1.6                   | 1.1                   | 1.1                   | 0.9                   | 1.2                   | 1.3                   | 1.0                   |
| <b>Admitted Hospital Characteristics</b>              |                       |                        |                       |                       |                       |                       |                       |                       |                       |                       |
| Large Teaching                                        | 8.5                   | 7.3                    | 7.9                   | 7.6                   | 7.3                   | 5.0                   | 8.9                   | 7.6                   | 8.8                   | 8.7                   |
| Private Not for profit                                | 60.6                  | 54.8                   | 57.8                  | 57.6                  | 54.8                  | 51.1                  | 58.9                  | 63.5                  | 66.6                  | 67.2                  |
| Rural                                                 | 26.6                  | 25.9                   | 28.5                  | 24.5                  | 24.8                  | 24.7                  | 28.6                  | 28.6                  | 26.7                  | 27.5                  |
| JC <sup>32</sup> Accredited                           | 81.7                  | 81.0                   | 82.2                  | 78.4                  | 76.6                  | 78.0                  | 79.4                  | 77.8                  | 79.6                  | 85.1                  |
| PCI <sup>33</sup>                                     | 43.4                  | 39.5                   | 39.9                  | 44.9                  | 46.9                  | 38.6                  | 44.6                  | 46.3                  | 48.3                  | 56.5                  |
| CABG <sup>34</sup>                                    | 33.1                  | 29.5                   | 31.2                  | 33.1                  | 34.2                  | 25.9                  | 29.6                  | 32.2                  | 34.9                  | 40.7                  |
| Beds, Median (IQR) <sup>35</sup>                      | 165.0 (77.5-300.0)    | 140.0 (60.0-263.5)     | 143.0 (70.0-262.0)    | 148.0 (71.0-286.0)    | 143.5 (64.0-288.0)    | 123.0 (46.0-243.0)    | 138.0 (67.0-252.0)    | 150.5 (73.5-300.0)    | 160.0 (78.0-295.0)    | 169.0 (88.0-322.0)    |

<sup>32</sup> JC: Joint Commission

<sup>33</sup> PCI: Percutaneous coronary intervention

<sup>34</sup> CABG: Coronary artery bypass graft surgery

<sup>35</sup> IQR: Interquartile Range

**eTable 10.** MPSMS Adverse Event and Exposure Data for AMI patients, 2010-2019<sup>36</sup>

**2010-2014**

| Measure                                                                             | 2010                              | 2011                      | 2012                      | 2013                     | 2014                      |
|-------------------------------------------------------------------------------------|-----------------------------------|---------------------------|---------------------------|--------------------------|---------------------------|
|                                                                                     | adverse events/exposures (% (CI)) |                           |                           |                          |                           |
| <b>Adverse Drug Events</b>                                                          |                                   |                           |                           |                          |                           |
| Adverse Events Associated with Digoxin                                              | 4/294 (1.4 [0.4-3.5])             | 4/224 (1.8 [0.5-4.5])     | 2/161 (1.2 [0.2-4.4])     | 1/89 (1.1 [0.0-6.1])     | 2/94 (2.1 [0.3-7.5])      |
| Adverse Events Associated with Hypoglycemic Agents                                  | 262/2926 (9.0 [7.9-10.1])         | 265/2733 (9.7 [8.6-10.9]) | 140/1837 (7.6 [6.5-8.9])  | 113/1542 (7.3 [6.1-8.7]) | 111/1583 (7.0 [5.8-8.4])  |
| Adverse Events Associated with IV Heparin                                           | 203/2274 (8.9 [7.8-10.2])         | 184/2236 (8.2 [7.1-9.5])  | 141/1540 (9.2 [7.8-10.7]) | 104/1322 (7.9 [6.5-9.5]) | 128/1446 (8.9 [7.4-10.4]) |
| Adverse Events Associated with Low Molecular Weight Heparin and Factor Xa Inhibitor | 150/3463 (4.3 [3.7-5.1])          | 126/3142 (4.0 [3.4-4.8])  | 97/2179 (4.5 [3.6-5.4])   | 56/1680 (3.3 [2.5-4.3])  | 68/1646 (4.1 [3.2-5.2])   |
| Adverse Events Associated with Warfarin                                             | 38/595 (6.4 [4.6-8.7])            | 29/486 (6.0 [4.0-8.5])    | 21/351 (6.0 [3.7-9.0])    | 19/238 (8.0 [4.9-12.2])  | 17/258 (6.6 [3.9-10.3])   |
| <b>General Adverse Events</b>                                                       |                                   |                           |                           |                          |                           |
| Hospital-Acquired Pressure Ulcers                                                   | 253/7727 (3.3 [2.9-3.7])          | 283/7113 (4.0 [3.5-4.5])  | 161/4934 (3.3 [2.8-3.8])  | 107/4027 (2.7 [2.2-3.2]) | 94/4234 (2.2 [1.8-2.7])   |
| Inpatient Falls                                                                     | 56/7727 (0.7 [0.6-0.9])           | 48/7113 (0.7 [0.5-0.9])   | 36/4934 (0.7 [0.5-1.0])   | 29/4027 (0.7 [0.5-1.0])  | 35/4234 (0.8 [0.6-1.2])   |
| <b>Hospital-Acquired Infections</b>                                                 |                                   |                           |                           |                          |                           |
| Hospital-Acquired Antibiotic-Associated Clostridium difficile                       | 15/2906 (0.5 [0.3-0.9])           | 14/2698 (0.5 [0.3-0.9])   | 10/1829 (0.5 [0.3-1.0])   | 6/1436 (0.4 [0.2-0.9])   | 7/1443 (0.5 [0.2-1.0])    |
| Central Line-Associated Blood Stream Infections                                     | 10/881 (1.1 [0.6-2.1])            | 5/705 (0.7 [0.2-1.7])     | 5/534 (0.9 [0.3-2.2])     | 1/427 (0.2 [0.0-1.3])    | 0/531 (0.0 [0.0-0.7])     |
| Catheter-Associated Urinary Tract Infections                                        | 134/2287 (5.9 [4.9-6.9])          | 108/2081 (5.2 [4.3-6.2])  | 59/1408 (4.2 [3.2-5.4])   | 45/1000 (4.5 [3.3-6.0])  | 36/1091 (3.3 [2.3-4.5])   |
| Hospital-Acquired Methicillin-Resistant Staphylococcus Aureus                       | 2/7586 (0.0 [0.0-0.1])            | 3/6981 (0.0 [0.0-0.1])    | 1/4829 (0.0 [0.0-0.1])    | 3/3966 (0.1 [0.0-0.2])   | 5/4187 (0.1 [0.0-0.3])    |
| Hospital-Acquired Vancomycin-Resistant Enterococcus                                 | 0/7711 (0.0 [0.0-0.1])            | 0/7098 (0.0 [0.0-0.1])    | 0/4929 (0.0 [0.0-0.1])    | 1/4016 (0.0 [0.0-0.1])   | 0/4226 (0.0 [0.0-0.1])    |

<sup>36</sup> Note: the same adverse event may be counted twice in this table, e.g., some instances of ventilator-associated pneumonia may also be cases of postoperative pneumonia, but these adverse events are only counted once in the analyzed summary data presented in the text and figures in this paper

| Measure                                                                                     | 2010                              | 2011                            | 2012                            | 2013                           | 2014                           |
|---------------------------------------------------------------------------------------------|-----------------------------------|---------------------------------|---------------------------------|--------------------------------|--------------------------------|
|                                                                                             | adverse events/exposures (% (CI)) |                                 |                                 |                                |                                |
| Postoperative Pneumonia                                                                     | 21/416 (5.0 [3.2-7.6])            | 24/364 (6.6 [4.3-9.7])          | 18/279 (6.5 [3.9-10.0])         | 7/236 (3.0 [1.2-6.0])          | 10/282 (3.5 [1.7-6.4])         |
| Ventilator-Associated Pneumonia                                                             | 22/228 (9.6 [6.2-14.2])           | 17/175 (9.7 [5.8-15.1])         | 13/150 (8.7 [4.7-14.4])         | 16/121 (13.2 [7.8-20.6])       | 16/129 (12.4 [7.3-19.4])       |
| <b>Post-Procedure Adverse Events</b>                                                        |                                   |                                 |                                 |                                |                                |
| Adverse Events Associated with Femoral Artery Puncture for Catheter Angiographic Procedures | 85/3508 (2.4 [1.9-3.0])           | 59/3132 (1.9 [1.4-2.4])         | 57/2109 (2.7 [2.1-3.5])         | 32/1710 (1.9 [1.3-2.6])        | 42/1869 (2.2 [1.6-3.0])        |
| Adverse Events Associated with Hip Joint Replacement                                        | 2/4 (50.0 [6.8-93.2])             |                                 |                                 |                                | 0/1 (0.0 [0.0-97.5])           |
| Contrast Nephropathy Associated with Catheter Angiography                                   | 371/3494 (10.6 [9.6-11.7])        | 364/3260 (11.2 [10.1-12.3])     | 221/2278 (9.7 [8.5-11.0])       | 209/1958 (10.7 [9.3-12.1])     | 238/2214 (10.7 [9.5-12.1])     |
| Mechanical Complications Associated with Central Lines                                      | 37/1064 (3.5 [2.5-4.8])           | 24/909 (2.6 [1.7-3.9])          | 28/671 (4.2 [2.8-6.0])          | 21/538 (3.9 [2.4-5.9])         | 22/637 (3.5 [2.2-5.2])         |
| Postoperative Cardiac Events (Cardiac and Non-cardiac Surgeries)                            | 17/442 (3.8 [2.3-6.1])            | 14/396 (3.5 [2.0-5.9])          | 18/310 (5.8 [3.5-9.0])          | 9/252 (3.6 [1.7-6.7])          | 14/302 (4.6 [2.6-7.7])         |
| Postoperative Venous Thromboembolic Event                                                   | 1/442 (0.2 [0.0-1.3])             | 2/396 (0.5 [0.1-1.8])           | 4/310 (1.3 [0.4-3.3])           | 4/252 (1.6 [0.4-4.0])          | 1/302 (0.3 [0.0-1.8])          |
| <b>Overall</b>                                                                              |                                   |                                 |                                 |                                |                                |
| Occurrence rate (exposure)                                                                  | 1683/55975 (3.0 [2.9-3.2])        | 1573/51242 (3.1 [2.9-3.2])      | 1032/35572 (2.9 [2.7-3.1])      | 783/28837 (2.7 [2.5-2.9])      | 846/30709 (2.8 [2.6-2.9])      |
| At-least one (discharge)                                                                    | 1234/7727 (16.0 [15.2-16.8])      | 1176/7113 (16.5 [15.7-17.4])    | 752/4934 (15.2 [14.3-16.3])     | 587/4027 (14.6 [13.5-15.7])    | 646/4234 (15.3 [14.2-16.4])    |
| Number of AE (per 1,000 discharges)                                                         | 1683/7727 (217.8 [208.7-227.2])   | 1573/7113 (221.1 [211.6-231.0]) | 1032/4934 (209.2 [197.9-220.8]) | 783/4027 (194.4 [182.3-207.0]) | 846/4234 (199.8 [187.9-212.2]) |
| In-hospital mortality (%)                                                                   | 472/7727 (6.1 [5.6-6.7])          | 413/7113 (5.8 [5.3-6.4])        | 313/4934 (6.3 [5.7-7.1])        | 226/4027 (5.6 [4.9-6.4])       | 229/4234 (5.4 [4.8-6.1])       |
| Mean age (SD)                                                                               | 538189/7727 (69.7 [14.9])         | 495586/7113 (69.7 [14.9])       | 344670/4934 (69.9 [14.9])       | 278438/4027 (69.1 [14.6])      | 292210/4234 (69.0 [14.5])      |
| Mean LOS (SD)                                                                               | 32704/7727 (4.2 [4.7])            | 28950/7113 (4.1 [4.2])          | 20219/4934 (4.1 [4.9])          | 16151/4027 (4.0 [4.4])         | 16826/4234 (4.0 [4.1])         |
| Mean number of exposures (SD)                                                               | 7.2 (2.5)                         | 7.2 (2.4)                       | 7.2 (2.5)                       | 7.2 (2.5)                      | 7.3 (2.6)                      |

| Measure                          | 2010                              | 2011          | 2012          | 2013          | 2014          |
|----------------------------------|-----------------------------------|---------------|---------------|---------------|---------------|
|                                  | adverse events/exposures (% (CI)) |               |               |               |               |
| Median number of exposures (IQR) | 7.0 (6.0-8.0)                     | 7.0 (6.0-8.0) | 7.0 (6.0-8.0) | 7.0 (6.0-8.0) | 7.0 (6.0-8.0) |

### 2015-2019

| Measure                                                                             | 2015                              | 2016                    | 2017                    | 2018                    | 2019                   |
|-------------------------------------------------------------------------------------|-----------------------------------|-------------------------|-------------------------|-------------------------|------------------------|
|                                                                                     | adverse events/exposures (% (CI)) |                         |                         |                         |                        |
| <b>Adverse Drug Events</b>                                                          |                                   |                         |                         |                         |                        |
| Adverse Events Associated with Digoxin                                              | 0/63 (0.0 [0.0-5.7])              | 1/72 (1.4 [0.0-7.5])    | 0/43 (0.0 [0.0-8.2])    | 0/10 (0.0 [0.0-30.9])   | 0/8 (0.0 [0.0-36.9])   |
| Adverse Events Associated with Hypoglycemic Agents                                  | 82/1488 (5.5 [4.4-6.8])           | 70/1359 (5.2 [4.0-6.5]) | 46/870 (5.3 [3.9-7.0])  | 29/584 (5.0 [3.4-7.1])  | 5/184 (2.7 [0.9-6.2])  |
| Adverse Events Associated with IV Heparin                                           | 85/1326 (6.4 [5.2-7.9])           | 67/1183 (5.7 [4.4-7.1]) | 45/910 (4.9 [3.6-6.6])  | 29/643 (4.5 [3.0-6.4])  | 6/275 (2.2 [0.8-4.7])  |
| Adverse Events Associated with Low Molecular Weight Heparin and Factor Xa Inhibitor | 42/1664 (2.5 [1.8-3.4])           | 23/1405 (1.6 [1.0-2.5]) | 9/898 (1.0 [0.5-1.9])   | 10/536 (1.9 [0.9-3.4])  | 1/143 (0.7 [0.0-3.8])  |
| Adverse Events Associated with Warfarin                                             | 9/249 (3.6 [1.7-6.8])             | 4/177 (2.3 [0.6-5.7])   | 3/124 (2.4 [0.5-6.9])   | 2/57 (3.5 [0.4-12.1])   | 1/18 (5.6 [0.1-27.3])  |
| <b>General Adverse Events</b>                                                       |                                   |                         |                         |                         |                        |
| Hospital-Acquired Pressure Ulcers                                                   | 115/4076 (2.8 [2.3-3.4])          | 74/3797 (1.9 [1.5-2.4]) | 47/2651 (1.8 [1.3-2.4]) | 38/1681 (2.3 [1.6-3.1]) | 14/567 (2.5 [1.4-4.1]) |
| Inpatient Falls                                                                     | 17/4076 (0.4 [0.2-0.7])           | 16/3797 (0.4 [0.2-0.7]) | 14/2651 (0.5 [0.3-0.9]) | 10/1681 (0.6 [0.3-1.1]) | 2/567 (0.4 [0.0-1.3])  |
| <b>Hospital-Acquired Infections</b>                                                 |                                   |                         |                         |                         |                        |
| Hospital-Acquired Antibiotic-Associated Clostridium difficile                       | 6/1360 (0.4 [0.2-1.0])            | 6/1140 (0.5 [0.2-1.1])  | 3/754 (0.4 [0.1-1.2])   | 3/498 (0.6 [0.1-1.8])   | 0/169 (0.0 [0.0-2.2])  |
| Central Line-Associated Blood Stream Infections                                     | 1/419 (0.2 [0.0-1.3])             | 1/311 (0.3 [0.0-1.8])   | 0/197 (0.0 [0.0-1.9])   | 1/151 (0.7 [0.0-3.6])   | 0/47 (0.0 [0.0-7.6])   |
| Catheter-Associated Urinary Tract Infections                                        | 36/966 (3.7 [2.6-5.1])            | 17/717 (2.4 [1.4-3.8])  | 15/490 (3.1 [1.7-5.0])  | 10/327 (3.1 [1.5-5.6])  | 5/96 (5.2 [1.7-11.7])  |
| Hospital-Acquired Methicillin-Resistant Staphylococcus Aureus                       | 0/4024 (0.0 [0.0-0.1])            | 1/3765 (0.0 [0.0-0.2])  | 2/2630 (0.1 [0.0-0.3])  | 0/1667 (0.0 [0.0-0.2])  | 0/561 (0.0 [0.0-0.7])  |
| Hospital-Acquired Vancomycin-Resistant Enterococcus                                 | 0/4067 (0.0 [0.0-0.1])            | 0/3791 (0.0 [0.0-0.1])  | 0/2643 (0.0 [0.0-0.1])  | 0/1673 (0.0 [0.0-0.2])  | 0/566 (0.0 [0.0-0.7])  |

| Measure                                                                                     | 2015                              | 2016                           | 2017                           | 2018                           | 2019                         |
|---------------------------------------------------------------------------------------------|-----------------------------------|--------------------------------|--------------------------------|--------------------------------|------------------------------|
|                                                                                             | adverse events/exposures (% (CI)) |                                |                                |                                |                              |
| Postoperative Pneumonia                                                                     | 6/151 (4.0 [1.5-8.5])             | 2/120 (1.7 [0.2-5.9])          | 2/81 (2.5 [0.3-8.6])           | 0/57 (0.0 [0.0-6.3])           | 0/21 (0.0 [0.0-16.1])        |
| Ventilator-Associated Pneumonia                                                             | 12/109 (11.0 [5.8-18.4])          | 5/63 (7.9 [2.6-17.6])          | 7/61 (11.5 [4.7-22.2])         | 3/43 (7.0 [1.5-19.1])          | 4/17 (23.5 [6.8-49.9])       |
| <b>Post-Procedure Adverse Events</b>                                                        |                                   |                                |                                |                                |                              |
| Adverse Events Associated with Femoral Artery Puncture for Catheter Angiographic Procedures | 44/1615 (2.7 [2.0-3.6])           | 54/1555 (3.5 [2.6-4.5])        | 14/946 (1.5 [0.8-2.5])         | 26/667 (3.9 [2.6-5.7])         | 8/207 (3.9 [1.7-7.5])        |
| Adverse Events Associated with Hip Joint Replacement                                        |                                   |                                | 0/1 (0.0 [0.0-97.5])           |                                |                              |
| Contrast Nephropathy Associated with Catheter Angiography                                   | 196/2027 (9.7 [8.4-11.0])         | 158/2034 (7.8 [6.6-9.0])       | 117/1444 (8.1 [6.8-9.6])       | 103/963 (10.7 [8.8-12.8])      | 27/354 (7.6 [5.1-10.9])      |
| Mechanical Complications Associated with Central Lines                                      | 21/550 (3.8 [2.4-5.8])            | 8/407 (2.0 [0.9-3.8])          | 7/266 (2.6 [1.1-5.4])          | 9/193 (4.7 [2.2-8.7])          | 2/65 (3.1 [0.4-10.7])        |
| Postoperative Cardiac Events (Cardiac and Non-cardiac Surgeries)                            | 11/156 (7.1 [3.6-12.3])           | 4/121 (3.3 [0.9-8.3])          | 6/87 (6.9 [2.6-14.4])          | 8/62 (12.9 [5.7-23.9])         | 3/22 (13.6 [2.9-34.9])       |
| Postoperative Venous Thromboembolic Event                                                   | 0/156 (0.0 [0.0-2.3])             | 1/121 (0.8 [0.0-4.5])          | 1/87 (1.1 [0.0-6.2])           | 0/62 (0.0 [0.0-5.8])           | 1/22 (4.5 [0.1-22.8])        |
| <b>Overall</b>                                                                              |                                   |                                |                                |                                |                              |
| Occurrence rate (exposure)                                                                  | 683/28542 (2.4 [2.2-2.6])         | 512/25935 (2.0 [1.8-2.2])      | 338/17834 (1.9 [1.7-2.1])      | 281/11555 (2.4 [2.2-2.7])      | 79/3909 (2.0 [1.6-2.5])      |
| At-least one (discharge)                                                                    | 530/4076 (13.0 [12.0-14.1])       | 407/3797 (10.7 [9.8-11.8])     | 267/2651 (10.1 [9.0-11.3])     | 223/1681 (13.3 [11.7-15.0])    | 65/567 (11.5 [9.0-14.4])     |
| Number of AE (per 1,000 discharges)                                                         | 683/4076 (167.6 [156.2-179.4])    | 512/3797 (134.8 [124.1-146.1]) | 338/2651 (127.5 [115.0-140.8]) | 281/1681 (167.2 [149.6-185.9]) | 79/567 (139.3 [111.9-170.6]) |
| In-hospital mortality (%)                                                                   | 192/4076 (4.7 [4.1-5.4])          | 189/3797 (5.0 [4.3-5.7])       | 116/2651 (4.4 [3.6-5.2])       | 79/1681 (4.7 [3.7-5.8])        | 20/567 (3.5 [2.2-5.4])       |
| Mean age (SD)                                                                               | 282374/4076 (69.3 [14.5])         | 260803/3797 (68.7 [14.5])      | 181006/2651 (68.3 [14.6])      | 115406/1681 (68.7 [14.5])      | 39153/567 (69.1 [14.4])      |
| Mean LOS (SD)                                                                               | 15719/4076 (3.9 [4.4])            | 13435/3797 (3.5 [4.2])         | 9442/2651 (3.6 [4.1])          | 6226/1681 (3.7 [3.9])          | 2081/567 (3.7 [4.4])         |
| Mean number of exposures (SD)                                                               | 7.0 (2.2)                         | 6.8 (2.0)                      | 6.7 (2.1)                      | 6.9 (2.1)                      | 6.9 (2.1)                    |



| Measure                          | 2015                              | 2016          | 2017          | 2018          | 2019          |
|----------------------------------|-----------------------------------|---------------|---------------|---------------|---------------|
|                                  | adverse events/exposures (% (CI)) |               |               |               |               |
| Median number of exposures (IQR) | 7.0 (6.0-8.0)                     | 6.0 (6.0-8.0) | 6.0 (5.0-7.0) | 6.0 (6.0-7.0) | 6.0 (6.0-8.0) |

**eTable 11.** MPSMS Adverse Event and Exposure Data for HF patients, 2010-2019<sup>37</sup>

**2010-2014**

| Measure                                                                             | 2010                              | 2011                        | 2012                      | 2013                      | 2014                        |
|-------------------------------------------------------------------------------------|-----------------------------------|-----------------------------|---------------------------|---------------------------|-----------------------------|
|                                                                                     | adverse events/exposures (% (CI)) |                             |                           |                           |                             |
| <b>Adverse Drug Events</b>                                                          |                                   |                             |                           |                           |                             |
| Adverse Events Associated with Digoxin                                              | 4/770 (0.5 [0.1-1.3])             | 2/641 (0.3 [0.0-1.1])       | 4/411 (1.0 [0.3-2.5])     | 0/387 (0.0 [0.0-1.0])     | 1/364 (0.3 [0.0-1.5])       |
| Adverse Events Associated with Hypoglycemic Agents                                  | 417/3360 (12.4 [11.3-13.6])       | 382/3114 (12.3 [11.1-13.5]) | 213/2163 (9.8 [8.6-11.2]) | 189/1944 (9.7 [8.4-11.1]) | 243/2077 (11.7 [10.4-13.2]) |
| Adverse Events Associated with IV Heparin                                           | 41/284 (14.4 [10.6-19.1])         | 31/276 (11.2 [7.8-15.6])    | 18/220 (8.2 [4.9-12.6])   | 21/202 (10.4 [6.6-15.5])  | 27/202 (13.4 [9.0-18.9])    |
| Adverse Events Associated with Low Molecular Weight Heparin and Factor Xa Inhibitor | 70/2679 (2.6 [2.0-3.3])           | 69/2515 (2.7 [2.1-3.5])     | 44/1774 (2.5 [1.8-3.3])   | 26/1642 (1.6 [1.0-2.3])   | 30/1807 (1.7 [1.1-2.4])     |
| Adverse Events Associated with Warfarin                                             | 70/1783 (3.9 [3.1-4.9])           | 57/1557 (3.7 [2.8-4.7])     | 38/1047 (3.6 [2.6-5.0])   | 30/991 (3.0 [2.1-4.3])    | 31/1010 (3.1 [2.1-4.3])     |
| <b>General Adverse Events</b>                                                       |                                   |                             |                           |                           |                             |
| Hospital-Acquired Pressure Ulcers                                                   | 346/7536 (4.6 [4.1-5.1])          | 305/6962 (4.4 [3.9-4.9])    | 223/4900 (4.6 [4.0-5.2])  | 179/4492 (4.0 [3.4-4.6])  | 187/4820 (3.9 [3.4-4.5])    |
| Inpatient Falls                                                                     | 83/7536 (1.1 [0.9-1.4])           | 82/6962 (1.2 [0.9-1.5])     | 49/4900 (1.0 [0.7-1.3])   | 44/4492 (1.0 [0.7-1.3])   | 59/4820 (1.2 [0.9-1.6])     |
| <b>Hospital-Acquired Infections</b>                                                 |                                   |                             |                           |                           |                             |
| Hospital-Acquired Antibiotic-Associated Clostridium difficile                       | 12/3801 (0.3 [0.2-0.6])           | 14/3447 (0.4 [0.2-0.7])     | 9/2438 (0.4 [0.2-0.7])    | 12/2205 (0.5 [0.3-1.0])   | 11/2303 (0.5 [0.2-0.9])     |
| Central Line-Associated Blood Stream Infections                                     | 3/333 (0.9 [0.2-2.6])             | 4/299 (1.3 [0.4-3.4])       | 0/207 (0.0 [0.0-1.8])     | 1/213 (0.5 [0.0-2.6])     | 1/242 (0.4 [0.0-2.3])       |
| Catheter-Associated Urinary Tract Infections                                        | 136/2523 (5.4 [4.5-6.3])          | 117/2289 (5.1 [4.3-6.1])    | 79/1578 (5.0 [4.0-6.2])   | 51/1282 (4.0 [3.0-5.2])   | 62/1302 (4.8 [3.7-6.1])     |
| Hospital-Acquired Methicillin-Resistant Staphylococcus Aureus                       | 3/7358 (0.0 [0.0-0.1])            | 4/6792 (0.1 [0.0-0.2])      | 1/4786 (0.0 [0.0-0.1])    | 1/4386 (0.0 [0.0-0.1])    | 2/4726 (0.0 [0.0-0.2])      |
| Hospital-Acquired Vancomycin-Resistant Enterococcus                                 | 3/7511 (0.0 [0.0-0.1])            | 0/6932 (0.0 [0.0-0.1])      | 0/4877 (0.0 [0.0-0.1])    | 1/4470 (0.0 [0.0-0.1])    | 1/4794 (0.0 [0.0-0.1])      |

<sup>37</sup> Note: the same adverse event may be counted twice in this table, e.g., some instances of ventilator-associated pneumonia may also be cases of postoperative pneumonia, but these adverse events are only counted once in the analyzed summary data presented in the text and figures in this paper

| Measure                                                                                     | 2010                              | 2011                            | 2012                           | 2013                           | 2014                           |
|---------------------------------------------------------------------------------------------|-----------------------------------|---------------------------------|--------------------------------|--------------------------------|--------------------------------|
|                                                                                             | adverse events/exposures (% (CI)) |                                 |                                |                                |                                |
| Postoperative Pneumonia                                                                     | 1/31 (3.2 [0.1-16.7])             | 0/22 (0.0 [0.0-15.4])           | 0/13 (0.0 [0.0-24.7])          | 0/22 (0.0 [0.0-15.4])          | 1/15 (6.7 [0.2-32.0])          |
| Ventilator-Associated Pneumonia                                                             | 1/46 (2.2 [0.1-11.5])             | 3/46 (6.5 [1.4-17.9])           | 2/40 (5.0 [0.6-16.9])          | 6/34 (17.6 [6.8-34.5])         | 1/28 (3.6 [0.1-18.4])          |
| <b>Post-Procedure Adverse Events</b>                                                        |                                   |                                 |                                |                                |                                |
| Adverse Events Associated with Femoral Artery Puncture for Catheter Angiographic Procedures | 1/407 (0.2 [0.0-1.4])             | 7/318 (2.2 [0.9-4.5])           | 1/203 (0.5 [0.0-2.7])          | 1/208 (0.5 [0.0-2.7])          | 5/186 (2.7 [0.9-6.2])          |
| Adverse Events Associated with Hip Joint Replacement                                        |                                   | 0/1 (0.0 [0.0-97.5])            |                                |                                |                                |
| Contrast Nephropathy Associated with Catheter Angiography                                   | 55/399 (13.8 [10.6-17.6])         | 35/311 (11.3 [8.0-15.3])        | 37/215 (17.2 [12.4-22.9])      | 32/233 (13.7 [9.6-18.8])       | 28/210 (13.3 [9.1-18.7])       |
| Mechanical Complications Associated with Central Lines                                      | 17/513 (3.3 [1.9-5.3])            | 25/466 (5.4 [3.5-7.8])          | 10/328 (3.0 [1.5-5.5])         | 12/333 (3.6 [1.9-6.2])         | 12/371 (3.2 [1.7-5.6])         |
| Postoperative Cardiac Events (Cardiac and Non-cardiac Surgeries)                            | 2/41 (4.9 [0.6-16.5])             | 0/28 (0.0 [0.0-12.3])           | 0/18 (0.0 [0.0-18.5])          | 0/25 (0.0 [0.0-13.7])          | 1/17 (5.9 [0.2-28.7])          |
| Postoperative Venous Thromboembolic Event                                                   | 1/41 (2.4 [0.1-12.9])             | 0/28 (0.0 [0.0-12.3])           | 0/18 (0.0 [0.0-18.5])          | 0/25 (0.0 [0.0-13.7])          | 0/17 (0.0 [0.0-19.5])          |
| <b>Overall</b>                                                                              |                                   |                                 |                                |                                |                                |
| Occurrence rate (exposure)                                                                  | 1266/46952 (2.7 [2.6-2.9])        | 1137/43006 (2.6 [2.5-2.8])      | 728/30136 (2.4 [2.3-2.6])      | 606/27586 (2.2 [2.0-2.4])      | 703/29311 (2.4 [2.2-2.6])      |
| At-least one (discharge)                                                                    | 1052/7536 (14.0 [13.2-14.8])      | 957/6962 (13.7 [13.0-14.6])     | 615/4900 (12.6 [11.6-13.5])    | 514/4492 (11.4 [10.5-12.4])    | 588/4820 (12.2 [11.3-13.2])    |
| Number of AE (per 1,000 discharges)                                                         | 1266/7536 (168.0 [159.6-176.6])   | 1137/6962 (163.3 [154.7-172.2]) | 728/4900 (148.6 [138.7-158.8]) | 606/4492 (134.9 [125.0-145.3]) | 703/4820 (145.9 [136.0-156.1]) |
| In-hospital mortality (%)                                                                   | 213/7536 (2.8 [2.5-3.2])          | 230/6962 (3.3 [2.9-3.8])        | 197/4900 (4.0 [3.5-4.6])       | 139/4492 (3.1 [2.6-3.6])       | 142/4820 (2.9 [2.5-3.5])       |
| Mean age (SD)                                                                               | 554970/7536 (73.6 [14.2])         | 512573/6962 (73.6 [14.3])       | 361264/4900 (73.7 [14.3])      | 329442/4492 (73.3 [14.2])      | 351296/4820 (72.9 [14.5])      |
| Mean LOS (SD)                                                                               | 35791/7536 (4.7 [4.3])            | 31954/6962 (4.6 [4.0])          | 22563/4900 (4.6 [3.8])         | 21058/4492 (4.7 [4.2])         | 22983/4820 (4.8 [4.2])         |
| Mean number of exposures (SD)                                                               | 6.2 (1.5)                         | 6.2 (1.5)                       | 6.2 (1.5)                      | 6.1 (1.5)                      | 6.1 (1.5)                      |

| Measure                          | 2010                              | 2011          | 2012          | 2013          | 2014          |
|----------------------------------|-----------------------------------|---------------|---------------|---------------|---------------|
|                                  | adverse events/exposures (% (CI)) |               |               |               |               |
| Median number of exposures (IQR) | 6.0 (5.0-7.0)                     | 6.0 (5.0-7.0) | 6.0 (5.0-7.0) | 6.0 (5.0-7.0) | 6.0 (5.0-7.0) |

## 2015-2019

| Measure                                                                             | 2015                              | 2016                     | 2017                      | 2018                    | 2019                    |
|-------------------------------------------------------------------------------------|-----------------------------------|--------------------------|---------------------------|-------------------------|-------------------------|
|                                                                                     | adverse events/exposures (% (CI)) |                          |                           |                         |                         |
| <b>Adverse Drug Events</b>                                                          |                                   |                          |                           |                         |                         |
| Adverse Events Associated with Digoxin                                              | 2/148 (1.4 [0.2-4.8])             | 0/288 (0.0 [0.0-1.3])    | 0/201 (0.0 [0.0-1.8])     | 0/79 (0.0 [0.0-4.6])    | 0/31 (0.0 [0.0-11.2])   |
| Adverse Events Associated with Hypoglycemic Agents                                  | 100/995 (10.1 [8.3-12.1])         | 155/2184 (7.1 [6.1-8.3]) | 142/1592 (8.9 [7.6-10.4]) | 70/726 (9.6 [7.6-12.0]) | 23/333 (6.9 [4.4-10.2]) |
| Adverse Events Associated with IV Heparin                                           | 13/108 (12.0 [6.6-19.7])          | 10/189 (5.3 [2.6-9.5])   | 8/163 (4.9 [2.1-9.4])     | 4/76 (5.3 [1.5-12.9])   | 2/47 (4.3 [0.5-14.5])   |
| Adverse Events Associated with Low Molecular Weight Heparin and Factor Xa Inhibitor | 14/904 (1.5 [0.9-2.6])            | 21/1751 (1.2 [0.7-1.8])  | 18/1137 (1.6 [0.9-2.5])   | 5/533 (0.9 [0.3-2.2])   | 3/197 (1.5 [0.3-4.4])   |
| Adverse Events Associated with Warfarin                                             | 13/436 (3.0 [1.6-5.0])            | 20/850 (2.4 [1.4-3.6])   | 18/624 (2.9 [1.7-4.5])    | 5/237 (2.1 [0.7-4.9])   | 4/85 (4.7 [1.3-11.6])   |
| <b>General Adverse Events</b>                                                       |                                   |                          |                           |                         |                         |
| Hospital-Acquired Pressure Ulcers                                                   | 100/2423 (4.1 [3.4-5.0])          | 196/5330 (3.7 [3.2-4.2]) | 139/3779 (3.7 [3.1-4.3])  | 83/1739 (4.8 [3.8-5.9]) | 29/774 (3.7 [2.5-5.3])  |
| Inpatient Falls                                                                     | 30/2423 (1.2 [0.8-1.8])           | 44/5330 (0.8 [0.6-1.1])  | 45/3779 (1.2 [0.9-1.6])   | 13/1739 (0.7 [0.4-1.3]) | 7/774 (0.9 [0.4-1.9])   |
| <b>Hospital-Acquired Infections</b>                                                 |                                   |                          |                           |                         |                         |
| Hospital-Acquired Antibiotic-Associated Clostridium difficile                       | 3/1164 (0.3 [0.1-0.8])            | 7/2423 (0.3 [0.1-0.6])   | 5/1755 (0.3 [0.1-0.7])    | 5/811 (0.6 [0.2-1.4])   | 0/322 (0.0 [0.0-1.1])   |
| Central Line-Associated Blood Stream Infections                                     | 0/104 (0.0 [0.0-3.5])             | 1/204 (0.5 [0.0-2.7])    | 1/176 (0.6 [0.0-3.1])     | 1/61 (1.6 [0.0-8.8])    | 1/40 (2.5 [0.1-13.2])   |
| Catheter-Associated Urinary Tract Infections                                        | 23/654 (3.5 [2.2-5.2])            | 56/1297 (4.3 [3.3-5.6])  | 37/879 (4.2 [3.0-5.8])    | 15/403 (3.7 [2.1-6.1])  | 8/141 (5.7 [2.5-10.9])  |
| Hospital-Acquired Methicillin-Resistant Staphylococcus Aureus                       | 2/2374 (0.1 [0.0-0.3])            | 3/5236 (0.1 [0.0-0.2])   | 2/3724 (0.1 [0.0-0.2])    | 1/1717 (0.1 [0.0-0.3])  | 0/764 (0.0 [0.0-0.5])   |

| Measure                                                                                     | 2015                              | 2016                          | 2017                           | 2018                           | 2019                        |
|---------------------------------------------------------------------------------------------|-----------------------------------|-------------------------------|--------------------------------|--------------------------------|-----------------------------|
|                                                                                             | adverse events/exposures (% (CI)) |                               |                                |                                |                             |
| Hospital-Acquired Vancomycin-Resistant Enterococcus                                         | 0/2420 (0.0 [0.0-0.2])            | 0/5312 (0.0 [0.0-0.1])        | 0/3768 (0.0 [0.0-0.1])         | 0/1735 (0.0 [0.0-0.2])         | 0/773 (0.0 [0.0-0.5])       |
| Postoperative Pneumonia                                                                     | 1/8 (12.5 [0.3-52.7])             | 0/9 (0.0 [0.0-33.6])          | 0/5 (0.0 [0.0-52.2])           | 0/5 (0.0 [0.0-52.2])           | 0/5 (0.0 [0.0-52.2])        |
| Ventilator-Associated Pneumonia                                                             | 1/18 (5.6 [0.1-27.3])             | 2/32 (6.3 [0.8-20.8])         | 1/21 (4.8 [0.1-23.8])          | 1/11 (9.1 [0.2-41.3])          | 0/3 (0.0 [0.0-70.8])        |
| <b>Post-Procedure Adverse Events</b>                                                        |                                   |                               |                                |                                |                             |
| Adverse Events Associated with Femoral Artery Puncture for Catheter Angiographic Procedures | 0/92 (0.0 [0.0-3.9])              | 0/146 (0.0 [0.0-2.5])         | 2/128 (1.6 [0.2-5.5])          | 3/50 (6.0 [1.3-16.6])          | 1/25 (4.0 [0.1-20.4])       |
| Adverse Events Associated with Hip Joint Replacement                                        |                                   |                               |                                | 0/1 (0.0 [0.0-97.5])           |                             |
| Contrast Nephropathy Associated with Catheter Angiography                                   | 18/110 (16.4 [10.0-24.6])         | 22/201 (10.9 [7.0-16.1])      | 18/176 (10.2 [6.2-15.7])       | 10/70 (14.3 [7.1-24.7])        | 8/39 (20.5 [9.3-36.5])      |
| Mechanical Complications Associated with Central Lines                                      | 4/161 (2.5 [0.7-6.2])             | 7/319 (2.2 [0.9-4.5])         | 8/262 (3.1 [1.3-5.9])          | 3/109 (2.8 [0.6-7.8])          | 4/62 (6.5 [1.8-15.7])       |
| Postoperative Cardiac Events (Cardiac and Non-cardiac Surgeries)                            | 1/12 (8.3 [0.2-38.5])             | 0/12 (0.0 [0.0-26.5])         | 0/6 (0.0 [0.0-45.9])           | 0/5 (0.0 [0.0-52.2])           | 0/5 (0.0 [0.0-52.2])        |
| Postoperative Venous Thromboembolic Event                                                   | 0/12 (0.0 [0.0-26.5])             | 0/12 (0.0 [0.0-26.5])         | 1/6 (16.7 [0.4-64.1])          | 0/5 (0.0 [0.0-52.2])           | 0/5 (0.0 [0.0-52.2])        |
| <b>Overall</b>                                                                              |                                   |                               |                                |                                |                             |
| Occurrence rate (exposure)                                                                  | 325/14566 (2.2 [2.0-2.5])         | 544/31125 (1.7 [1.6-1.9])     | 445/22181 (2.0 [1.8-2.2])      | 219/10112 (2.2 [1.9-2.5])      | 90/4425 (2.0 [1.6-2.5])     |
| At-least one (discharge)                                                                    | 276/2423 (11.4 [10.2-12.7])       | 474/5330 (8.9 [8.1-9.7])      | 383/3779 (10.1 [9.2-11.1])     | 197/1739 (11.3 [9.9-12.9])     | 77/774 (9.9 [7.9-12.3])     |
| Number of AE (per 1,000 discharges)                                                         | 325/2423 (134.1 [120.8-148.4])    | 544/5330 (102.1 [94.1-110.5]) | 445/3779 (117.8 [107.7-128.5]) | 219/1739 (125.9 [110.7-142.5]) | 90/774 (116.3 [94.6-141.0]) |
| In-hospital mortality (%)                                                                   | 63/2423 (2.6 [2.0-3.3])           | 135/5330 (2.5 [2.1-3.0])      | 111/3779 (2.9 [2.4-3.5])       | 40/1739 (2.3 [1.7-3.1])        | 19/774 (2.5 [1.5-3.8])      |
| Mean age (SD)                                                                               | 176701/2423 (72.9 [14.2])         | 389589/5330 (73.1 [14.4])     | 276768/3779 (73.2 [14.3])      | 127357/1739 (73.2 [14.5])      | 56154/774 (72.6 [14.0])     |
| Mean LOS (SD)                                                                               | 10982/2423 (4.5 [3.8])            | 23840/5330 (4.5 [4.0])        | 17077/3779 (4.5 [4.1])         | 8058/1739 (4.6 [4.4])          | 3484/774 (4.5 [3.8])        |

| Measure                          | 2015                              | 2016          | 2017          | 2018          | 2019          |
|----------------------------------|-----------------------------------|---------------|---------------|---------------|---------------|
|                                  | adverse events/exposures (% (CI)) |               |               |               |               |
| Mean number of exposures (SD)    | 6.0 (1.5)                         | 5.8 (1.3)     | 5.9 (1.3)     | 5.8 (1.3)     | 5.7 (1.4)     |
| Median number of exposures (IQR) | 6.0 (5.0-7.0)                     | 6.0 (5.0-7.0) | 6.0 (5.0-7.0) | 6.0 (5.0-7.0) | 6.0 (5.0-6.0) |

**eTable 12.** MPSMS Adverse Event and Exposure Data for PNE patients, 2010-2019<sup>38</sup>

**2010-2014**

| Measure                                                                             | 2010                              | 2011                        | 2012                       | 2013                       | 2014                      |
|-------------------------------------------------------------------------------------|-----------------------------------|-----------------------------|----------------------------|----------------------------|---------------------------|
|                                                                                     | adverse events/exposures (% (CI)) |                             |                            |                            |                           |
| <b>Adverse Drug Events</b>                                                          |                                   |                             |                            |                            |                           |
| Adverse Events Associated with Digoxin                                              | 3/433 (0.7 [0.1-2.0])             | 2/413 (0.5 [0.1-1.7])       | 1/371 (0.3 [0.0-1.5])      | 4/151 (2.6 [0.7-6.6])      | 3/144 (2.1 [0.4-6.0])     |
| Adverse Events Associated with Hypoglycemic Agents                                  | 367/3471 (10.6 [9.6-11.6])        | 412/3577 (11.5 [10.5-12.6]) | 334/3198 (10.4 [9.4-11.6]) | 172/1684 (10.2 [8.8-11.8]) | 166/1766 (9.4 [8.1-10.9]) |
| Adverse Events Associated with IV Heparin                                           | 50/257 (19.5 [14.8-24.8])         | 68/278 (24.5 [19.5-30.0])   | 46/234 (19.7 [14.8-25.3])  | 22/136 (16.2 [10.4-23.5])  | 30/168 (17.9 [12.4-24.5]) |
| Adverse Events Associated with Low Molecular Weight Heparin and Factor Xa Inhibitor | 161/3626 (4.4 [3.8-5.2])          | 161/3841 (4.2 [3.6-4.9])    | 120/3491 (3.4 [2.9-4.1])   | 54/1971 (2.7 [2.1-3.6])    | 62/2218 (2.8 [2.2-3.6])   |
| Adverse Events Associated with Warfarin                                             | 85/1041 (8.2 [6.6-10.0])          | 104/1070 (9.7 [8.0-11.7])   | 73/979 (7.5 [5.9-9.3])     | 42/498 (8.4 [6.2-11.2])    | 40/474 (8.4 [6.1-11.3])   |
| <b>General Adverse Events</b>                                                       |                                   |                             |                            |                            |                           |
| Hospital-Acquired Pressure Ulcers                                                   | 726/9311 (7.8 [7.3-8.4])          | 716/9744 (7.3 [6.8-7.9])    | 639/8730 (7.3 [6.8-7.9])   | 291/4666 (6.2 [5.6-7.0])   | 304/4941 (6.2 [5.5-6.9])  |
| Inpatient Falls                                                                     | 113/9311 (1.2 [1.0-1.5])          | 105/9744 (1.1 [0.9-1.3])    | 76/8730 (0.9 [0.7-1.1])    | 40/4666 (0.9 [0.6-1.2])    | 48/4941 (1.0 [0.7-1.3])   |
| <b>Hospital-Acquired Infections</b>                                                 |                                   |                             |                            |                            |                           |
| Hospital-Acquired Antibiotic-Associated Clostridium difficile                       | 66/9224 (0.7 [0.6-0.9])           | 62/9648 (0.6 [0.5-0.8])     | 60/8630 (0.7 [0.5-0.9])    | 39/4600 (0.8 [0.6-1.2])    | 33/4879 (0.7 [0.5-1.0])   |
| Central Line-Associated Blood Stream Infections                                     | 0/116 (0.0 [0.0-3.1])             | 2/106 (1.9 [0.2-6.7])       | 2/95 (2.1 [0.3-7.4])       | 0/48 (0.0 [0.0-7.4])       | 1/48 (2.1 [0.1-11.1])     |
| Catheter-Associated Urinary Tract Infections                                        | 106/2560 (4.1 [3.4-5.0])          | 96/2573 (3.7 [3.0-4.5])     | 77/2239 (3.4 [2.7-4.3])    | 54/1145 (4.7 [3.6-6.1])    | 41/1246 (3.3 [2.4-4.4])   |
| Hospital-Acquired Methicillin-Resistant Staphylococcus Aureus                       | 9/8743 (0.1 [0.1-0.2])            | 6/9163 (0.1 [0.0-0.1])      | 3/8208 (0.0 [0.0-0.1])     | 4/4440 (0.1 [0.0-0.2])     | 2/4714 (0.0 [0.0-0.2])    |
| Hospital-Acquired Vancomycin-Resistant Enterococcus                                 | 11/9231 (0.1 [0.1-0.2])           | 6/9664 (0.1 [0.0-0.1])      | 2/8654 (0.0 [0.0-0.1])     | 0/4611 (0.0 [0.0-0.1])     | 5/4894 (0.1 [0.0-0.2])    |

<sup>38</sup> Note: the same adverse event may be counted twice in this table, e.g., some instances of ventilator-associated pneumonia may also be cases of postoperative pneumonia, but these adverse events are only counted once in the analyzed summary data presented in the text and figures in this paper

| Measure                                                                                     | 2010                              | 2011                            | 2012                            | 2013                           | 2014                           |
|---------------------------------------------------------------------------------------------|-----------------------------------|---------------------------------|---------------------------------|--------------------------------|--------------------------------|
|                                                                                             | adverse events/exposures (% (CI)) |                                 |                                 |                                |                                |
| Postoperative Pneumonia                                                                     | 11/49 (22.4 [11.8-36.6])          | 11/25 (44.0 [24.4-65.1])        | 10/23 (43.5 [23.2-65.5])        | 10/26 (38.5 [20.2-59.4])       | 8/28 (28.6 [13.2-48.7])        |
| Ventilator-Associated Pneumonia                                                             | 27/206 (13.1 [8.8-18.5])          | 34/213 (16.0 [11.3-21.6])       | 23/194 (11.9 [7.7-17.3])        | 11/99 (11.1 [5.7-19.0])        | 15/132 (11.4 [6.5-18.1])       |
| <b>Post-Procedure Adverse Events</b>                                                        |                                   |                                 |                                 |                                |                                |
| Adverse Events Associated with Femoral Artery Puncture for Catheter Angiographic Procedures | 0/69 (0.0 [0.0-5.2])              | 1/56 (1.8 [0.1-9.6])            | 1/60 (1.7 [0.0-8.9])            | 2/31 (6.5 [0.8-21.4])          | 0/46 (0.0 [0.0-7.7])           |
| Adverse Events Associated with Hip Joint Replacement                                        | 0/3 (0.0 [0.0-70.8])              | 0/1 (0.0 [0.0-97.5])            | 2/4 (50.0 [6.8-93.2])           | 1/1 (100.0 [2.5-0.0])          |                                |
| Contrast Nephropathy Associated with Catheter Angiography                                   | 18/72 (25.0 [15.5-36.6])          | 7/47 (14.9 [6.2-28.3])          | 12/58 (20.7 [11.2-33.4])        | 8/35 (22.9 [10.4-40.1])        | 14/51 (27.5 [15.9-41.7])       |
| Mechanical Complications Associated with Central Lines                                      | 63/1594 (4.0 [3.1-5.0])           | 67/1542 (4.3 [3.4-5.5])         | 56/1407 (4.0 [3.0-5.1])         | 27/821 (3.3 [2.2-4.8])         | 40/920 (4.3 [3.1-5.9])         |
| Postoperative Cardiac Events (Cardiac and Non-cardiac Surgeries)                            | 3/100 (3.0 [0.6-8.5])             | 6/75 (8.0 [3.0-16.6])           | 5/76 (6.6 [2.2-14.7])           | 2/49 (4.1 [0.5-14.0])          | 1/45 (2.2 [0.1-11.8])          |
| Postoperative Venous Thromboembolic Event                                                   | 0/100 (0.0 [0.0-3.6])             | 1/75 (1.3 [0.0-7.2])            | 1/76 (1.3 [0.0-7.1])            | 0/49 (0.0 [0.0-7.3])           | 1/45 (2.2 [0.1-11.8])          |
| <b>Overall</b>                                                                              |                                   |                                 |                                 |                                |                                |
| Occurrence rate (exposure)                                                                  | 1819/59517 (3.1 [2.9-3.2])        | 1867/61855 (3.0 [2.9-3.2])      | 1543/55457 (2.8 [2.7-2.9])      | 783/29727 (2.6 [2.5-2.8])      | 814/31700 (2.6 [2.4-2.8])      |
| At-least one (discharge)                                                                    | 1429/9311 (15.3 [14.6-16.1])      | 1452/9744 (14.9 [14.2-15.6])    | 1221/8730 (14.0 [13.3-14.7])    | 621/4666 (13.3 [12.4-14.3])    | 650/4941 (13.2 [12.2-14.1])    |
| Number of AE (per 1,000 discharges)                                                         | 1819/9311 (195.4 [187.4-203.6])   | 1867/9744 (191.6 [183.8-199.6]) | 1543/8730 (176.7 [168.8-184.9]) | 783/4666 (167.8 [157.2-178.9]) | 814/4941 (164.7 [154.5-175.4]) |
| In-hospital mortality (%)                                                                   | 731/9311 (7.9 [7.3-8.4])          | 746/9744 (7.7 [7.1-8.2])        | 608/8730 (7.0 [6.4-7.5])        | 329/4666 (7.1 [6.3-7.8])       | 393/4941 (8.0 [7.2-8.7])       |
| Mean age (SD)                                                                               | 639069/9311 (68.6 [17.1])         | 671506/9744 (68.9 [16.9])       | 602260/8730 (69.0 [16.7])       | 319656/4666 (68.5 [16.9])      | 338457/4941 (68.5 [16.7])      |
| Mean LOS (SD)                                                                               | 57552/9311 (6.2 [6.3])            | 57582/9744 (5.9 [6.3])          | 50286/8730 (5.8 [5.6])          | 28230/4666 (6.1 [6.6])         | 29192/4941 (5.9 [6.0])         |
| Mean number of exposures (SD)                                                               | 6.4 (1.4)                         | 6.3 (1.3)                       | 6.4 (1.3)                       | 6.4 (1.3)                      | 6.4 (1.3)                      |



| Measure                          | 2010                              | 2011          | 2012          | 2013          | 2014          |
|----------------------------------|-----------------------------------|---------------|---------------|---------------|---------------|
|                                  | adverse events/exposures (% (CI)) |               |               |               |               |
| Median number of exposures (IQR) | 6.0 (5.0-7.0)                     | 6.0 (5.0-7.0) | 6.0 (5.0-7.0) | 6.0 (5.0-7.0) | 6.0 (6.0-7.0) |

## 2015-2019

| Measure                                                                             | 2015                              | 2016                     | 2017                     | 2018                    | 2019                   |
|-------------------------------------------------------------------------------------|-----------------------------------|--------------------------|--------------------------|-------------------------|------------------------|
|                                                                                     | adverse events/exposures (% (CI)) |                          |                          |                         |                        |
| <b>Adverse Drug Events</b>                                                          |                                   |                          |                          |                         |                        |
| Adverse Events Associated with Digoxin                                              | 0/67 (0.0 [0.0-5.4])              | 0/147 (0.0 [0.0-2.5])    | 0/95 (0.0 [0.0-3.8])     | 1/45 (2.2 [0.1-11.8])   | 0/11 (0.0 [0.0-28.5])  |
| Adverse Events Associated with Hypoglycemic Agents                                  | 71/799 (8.9 [7.0-11.1])           | 162/1901 (8.5 [7.3-9.9]) | 102/1347 (7.6 [6.2-9.1]) | 51/572 (8.9 [6.7-11.6]) | 19/294 (6.5 [3.9-9.9]) |
| Adverse Events Associated with IV Heparin                                           | 9/62 (14.5 [6.9-25.8])            | 21/173 (12.1 [7.7-18.0]) | 9/128 (7.0 [3.3-12.9])   | 8/69 (11.6 [5.1-21.6])  | 3/38 (7.9 [1.7-21.4])  |
| Adverse Events Associated with Low Molecular Weight Heparin and Factor Xa Inhibitor | 21/988 (2.1 [1.3-3.2])            | 51/2327 (2.2 [1.6-2.9])  | 25/1609 (1.6 [1.0-2.3])  | 13/676 (1.9 [1.0-3.3])  | 8/317 (2.5 [1.1-4.9])  |
| Adverse Events Associated with Warfarin                                             | 19/231 (8.2 [5.0-12.6])           | 25/393 (6.4 [4.2-9.3])   | 18/290 (6.2 [3.7-9.6])   | 7/104 (6.7 [2.8-13.4])  | 3/43 (7.0 [1.5-19.1])  |
| <b>General Adverse Events</b>                                                       |                                   |                          |                          |                         |                        |
| Hospital-Acquired Pressure Ulcers                                                   | 141/2427 (5.8 [4.9-6.8])          | 317/5737 (5.5 [5.0-6.2]) | 206/4004 (5.1 [4.5-5.9]) | 95/1707 (5.6 [4.5-6.8]) | 45/858 (5.2 [3.9-7.0]) |
| Inpatient Falls                                                                     | 19/2427 (0.8 [0.5-1.2])           | 51/5737 (0.9 [0.7-1.2])  | 28/4004 (0.7 [0.5-1.0])  | 22/1707 (1.3 [0.8-1.9]) | 9/858 (1.0 [0.5-2.0])  |
| <b>Hospital-Acquired Infections</b>                                                 |                                   |                          |                          |                         |                        |
| Hospital-Acquired Antibiotic-Associated Clostridium difficile                       | 14/2398 (0.6 [0.3-1.0])           | 31/5666 (0.5 [0.4-0.8])  | 24/3949 (0.6 [0.4-0.9])  | 8/1686 (0.5 [0.2-0.9])  | 5/848 (0.6 [0.2-1.4])  |
| Central Line-Associated Blood Stream Infections                                     | 0/25 (0.0 [0.0-13.7])             | 1/53 (1.9 [0.1-10.1])    | 2/32 (6.3 [0.8-20.8])    | 0/17 (0.0 [0.0-19.5])   | 0/9 (0.0 [0.0-33.6])   |
| Catheter-Associated Urinary Tract Infections                                        | 19/564 (3.4 [2.0-5.2])            | 32/1284 (2.5 [1.7-3.5])  | 16/953 (1.7 [1.0-2.7])   | 10/412 (2.4 [1.2-4.4])  | 2/188 (1.1 [0.1-3.8])  |
| Hospital-Acquired Methicillin-Resistant Staphylococcus Aureus                       | 1/2318 (0.0 [0.0-0.2])            | 2/5519 (0.0 [0.0-0.1])   | 2/3829 (0.1 [0.0-0.2])   | 1/1647 (0.1 [0.0-0.3])  | 1/834 (0.1 [0.0-0.7])  |

| Measure                                                                                     | 2015                              | 2016                           | 2017                           | 2018                           | 2019                         |
|---------------------------------------------------------------------------------------------|-----------------------------------|--------------------------------|--------------------------------|--------------------------------|------------------------------|
|                                                                                             | adverse events/exposures (% (CI)) |                                |                                |                                |                              |
| Hospital-Acquired Vancomycin-Resistant Enterococcus                                         | 1/2414 (0.0 [0.0-0.2])            | 0/5702 (0.0 [0.0-0.1])         | 2/3979 (0.1 [0.0-0.2])         | 0/1694 (0.0 [0.0-0.2])         | 0/857 (0.0 [0.0-0.4])        |
| Postoperative Pneumonia                                                                     | 1/10 (10.0 [0.3-44.5])            | 3/15 (20.0 [4.3-48.1])         | 0/12 (0.0 [0.0-26.5])          | 0/5 (0.0 [0.0-52.2])           |                              |
| Ventilator-Associated Pneumonia                                                             | 6/59 (10.2 [3.8-20.8])            | 13/120 (10.8 [5.9-17.8])       | 9/90 (10.0 [4.7-18.1])         | 6/47 (12.8 [4.8-25.7])         | 5/20 (25.0 [8.7-49.1])       |
| <b>Post-Procedure Adverse Events</b>                                                        |                                   |                                |                                |                                |                              |
| Adverse Events Associated with Femoral Artery Puncture for Catheter Angiographic Procedures | 0/14 (0.0 [0.0-23.2])             | 0/39 (0.0 [0.0-9.0])           | 1/25 (4.0 [0.1-20.4])          | 0/10 (0.0 [0.0-30.9])          | 0/5 (0.0 [0.0-52.2])         |
| Adverse Events Associated with Hip Joint Replacement                                        | 1/4 (25.0 [0.6-80.6])             |                                | 0/1 (0.0 [0.0-97.5])           | 0/1 (0.0 [0.0-97.5])           |                              |
| Contrast Nephropathy Associated with Catheter Angiography                                   | 4/18 (22.2 [6.4-47.6])            | 5/34 (14.7 [5.0-31.1])         | 7/30 (23.3 [9.9-42.3])         | 1/12 (8.3 [0.2-38.5])          | 0/6 (0.0 [0.0-45.9])         |
| Mechanical Complications Associated with Central Lines                                      | 7/381 (1.8 [0.7-3.8])             | 33/939 (3.5 [2.4-4.9])         | 17/654 (2.6 [1.5-4.1])         | 14/301 (4.7 [2.6-7.7])         | 2/142 (1.4 [0.2-5.0])        |
| Postoperative Cardiac Events (Cardiac and Non-cardiac Surgeries)                            | 0/14 (0.0 [0.0-23.2])             | 1/23 (4.3 [0.1-22.0])          | 1/19 (5.3 [0.1-26.0])          | 1/6 (16.7 [0.4-64.1])          | 0/3 (0.0 [0.0-70.8])         |
| Postoperative Venous Thromboembolic Event                                                   | 0/14 (0.0 [0.0-23.2])             | 3/23 (13.0 [2.8-33.6])         | 0/19 (0.0 [0.0-17.7])          | 0/6 (0.0 [0.0-45.9])           | 0/3 (0.0 [0.0-70.8])         |
| <b>Overall</b>                                                                              |                                   |                                |                                |                                |                              |
| Occurrence rate (exposure)                                                                  | 334/15234 (2.2 [2.0-2.4])         | 751/35832 (2.1 [2.0-2.3])      | 469/25069 (1.9 [1.7-2.1])      | 238/10724 (2.2 [2.0-2.5])      | 102/5334 (1.9 [1.6-2.3])     |
| At-least one (discharge)                                                                    | 273/2427 (11.2 [10.0-12.6])       | 619/5737 (10.8 [10.0-11.6])    | 390/4004 (9.7 [8.8-10.7])      | 201/1707 (11.8 [10.3-13.4])    | 86/858 (10.0 [8.1-12.2])     |
| Number of AE (per 1,000 discharges)                                                         | 334/2427 (137.6 [124.2-152.0])    | 751/5737 (130.9 [122.3-139.9]) | 469/4004 (117.1 [107.3-127.5]) | 238/1707 (139.4 [123.3-156.8]) | 102/858 (118.9 [98.0-142.4]) |
| In-hospital mortality (%)                                                                   | 166/2427 (6.8 [5.9-7.9])          | 359/5737 (6.3 [5.6-6.9])       | 279/4004 (7.0 [6.2-7.8])       | 114/1707 (6.7 [5.5-8.0])       | 53/858 (6.2 [4.7-8.0])       |
| Mean age (SD)                                                                               | 168797/2427 (69.5 [16.3])         | 391607/5737 (68.3 [16.9])      | 275915/4004 (68.9 [16.7])      | 118180/1707 (69.2 [16.3])      | 58072/858 (67.7 [16.6])      |
| Mean LOS (SD)                                                                               | 13319/2427 (5.5 [5.5])            | 31714/5737 (5.5 [5.7])         | 22261/4004 (5.6 [6.1])         | 9773/1707 (5.7 [5.4])          | 4864/858 (5.7 [6.2])         |

| Measure                          | 2015                              | 2016          | 2017          | 2018          | 2019          |
|----------------------------------|-----------------------------------|---------------|---------------|---------------|---------------|
|                                  | adverse events/exposures (% (CI)) |               |               |               |               |
| Mean number of exposures (SD)    | 6.3 (1.2)                         | 6.2 (1.2)     | 6.3 (1.2)     | 6.3 (1.2)     | 6.2 (1.2)     |
| Median number of exposures (IQR) | 6.0 (5.0-7.0)                     | 6.0 (5.0-7.0) | 6.0 (5.0-7.0) | 6.0 (5.0-7.0) | 6.0 (5.0-7.0) |

**eTable 13.** MPSMS Adverse Event and Exposure Data for SCIP patients, 2010-2019<sup>39</sup>

**2010-2014**

| Measure                                                                             | 2010                              | 2011                      | 2012                      | 2013                      | 2014                      |
|-------------------------------------------------------------------------------------|-----------------------------------|---------------------------|---------------------------|---------------------------|---------------------------|
|                                                                                     | adverse events/exposures (% (CI)) |                           |                           |                           |                           |
| <b>Adverse Drug Events</b>                                                          |                                   |                           |                           |                           |                           |
| Adverse Events Associated with Digoxin                                              | 0/143 (0.0 [0.0-2.6])             | 1/112 (0.9 [0.0-4.9])     | 0/103 (0.0 [0.0-3.5])     | 0/45 (0.0 [0.0-7.9])      | 0/38 (0.0 [0.0-9.3])      |
| Adverse Events Associated with Hypoglycemic Agents                                  | 190/2399 (7.9 [6.9-9.1])          | 157/2464 (6.4 [5.4-7.4])  | 132/2234 (5.9 [5.0-7.0])  | 68/1218 (5.6 [4.4-7.0])   | 76/1376 (5.5 [4.4-6.9])   |
| Adverse Events Associated with IV Heparin                                           | 70/221 (31.7 [25.6-38.3])         | 61/233 (26.2 [20.7-32.3]) | 52/270 (19.3 [14.7-24.5]) | 29/131 (22.1 [15.4-30.2]) | 34/154 (22.1 [15.8-29.5]) |
| Adverse Events Associated with Low Molecular Weight Heparin and Factor Xa Inhibitor | 260/3573 (7.3 [6.5-8.2])          | 303/4273 (7.1 [6.3-7.9])  | 234/3386 (6.9 [6.1-7.8])  | 105/1871 (5.6 [4.6-6.8])  | 112/2056 (5.4 [4.5-6.5])  |
| Adverse Events Associated with Warfarin                                             | 95/1830 (5.2 [4.2-6.3])           | 121/1967 (6.2 [5.1-7.3])  | 76/1473 (5.2 [4.1-6.4])   | 36/791 (4.6 [3.2-6.3])    | 29/699 (4.1 [2.8-5.9])    |
| <b>General Adverse Events</b>                                                       |                                   |                           |                           |                           |                           |
| Hospital-Acquired Pressure Ulcers                                                   | 299/9104 (3.3 [2.9-3.7])          | 338/10148 (3.3 [3.0-3.7]) | 299/8692 (3.4 [3.1-3.8])  | 116/4767 (2.4 [2.0-2.9])  | 127/5480 (2.3 [1.9-2.8])  |
| Inpatient Falls                                                                     | 70/9104 (0.8 [0.6-1.0])           | 79/10148 (0.8 [0.6-1.0])  | 70/8692 (0.8 [0.6-1.0])   | 42/4767 (0.9 [0.6-1.2])   | 41/5480 (0.7 [0.5-1.0])   |
| <b>Hospital-Acquired Infections</b>                                                 |                                   |                           |                           |                           |                           |
| Hospital-Acquired Antibiotic-Associated Clostridium difficile                       | 18/9009 (0.2 [0.1-0.3])           | 43/10065 (0.4 [0.3-0.6])  | 34/8567 (0.4 [0.3-0.6])   | 14/4715 (0.3 [0.2-0.5])   | 19/5400 (0.4 [0.2-0.6])   |
| Central Line-Associated Blood Stream Infections                                     | 16/1273 (1.3 [0.7-2.0])           | 18/1114 (1.6 [1.0-2.5])   | 17/1094 (1.6 [0.9-2.5])   | 6/577 (1.0 [0.4-2.3])     | 3/664 (0.5 [0.1-1.3])     |
| Catheter-Associated Urinary Tract Infections                                        | 168/7801 (2.2 [1.8-2.5])          | 166/8681 (1.9 [1.6-2.2])  | 143/7374 (1.9 [1.6-2.3])  | 68/3897 (1.7 [1.4-2.2])   | 65/4376 (1.5 [1.2-1.9])   |
| Hospital-Acquired Methicillin-Resistant Staphylococcus Aureus                       | 6/9018 (0.1 [0.0-0.1])            | 7/10072 (0.1 [0.0-0.1])   | 6/8600 (0.1 [0.0-0.2])    | 0/4718 (0.0 [0.0-0.1])    | 3/5439 (0.1 [0.0-0.2])    |
| Hospital-Acquired Vancomycin-Resistant Enterococcus                                 | 6/9089 (0.1 [0.0-0.1])            | 2/10130 (0.0 [0.0-0.1])   | 3/8671 (0.0 [0.0-0.1])    | 6/4761 (0.1 [0.1-0.3])    | 4/5468 (0.1 [0.0-0.2])    |

<sup>39</sup> Note: the same adverse event may be counted twice in this table, e.g., some instances of ventilator-associated pneumonia may also be cases of postoperative pneumonia, but these adverse events are only counted once in the analyzed summary data presented in the text and figures in this paper

| Measure                                                                                     | 2010                              | 2011                             | 2012                            | 2013                           | 2014                           |
|---------------------------------------------------------------------------------------------|-----------------------------------|----------------------------------|---------------------------------|--------------------------------|--------------------------------|
|                                                                                             | adverse events/exposures (% (CI)) |                                  |                                 |                                |                                |
| Postoperative Pneumonia                                                                     | 186/8948 (2.1 [1.8-2.4])          | 177/9721 (1.8 [1.6-2.1])         | 149/8364 (1.8 [1.5-2.1])        | 65/4658 (1.4 [1.1-1.8])        | 81/5373 (1.5 [1.2-1.9])        |
| Ventilator-Associated Pneumonia                                                             | 31/218 (14.2 [9.9-19.6])          | 23/202 (11.4 [7.4-16.6])         | 22/202 (10.9 [7.0-16.0])        | 7/103 (6.8 [2.8-13.5])         | 14/127 (11.0 [6.2-17.8])       |
| <b>Post-Procedure Adverse Events</b>                                                        |                                   |                                  |                                 |                                |                                |
| Adverse Events Associated with Femoral Artery Puncture for Catheter Angiographic Procedures | 4/275 (1.5 [0.4-3.7])             | 4/234 (1.7 [0.5-4.3])            | 5/215 (2.3 [0.8-5.3])           | 1/106 (0.9 [0.0-5.1])          | 0/141 (0.0 [0.0-2.6])          |
| Adverse Events Associated with Hip Joint Replacement                                        | 111/1434 (7.7 [6.4-9.3])          | 123/1602 (7.7 [6.4-9.1])         | 90/1410 (6.4 [5.2-7.8])         | 43/905 (4.8 [3.5-6.4])         | 47/1035 (4.5 [3.4-6.0])        |
| Adverse Events Associated with Knee Joint Replacement                                       | 105/2133 (4.9 [4.0-5.9])          | 121/2545 (4.8 [4.0-5.7])         | 78/2145 (3.6 [2.9-4.5])         | 28/1247 (2.2 [1.5-3.2])        | 40/1520 (2.6 [1.9-3.6])        |
| Contrast Nephropathy Associated with Catheter Angiography                                   | 70/294 (23.8 [19.1-29.1])         | 64/254 (25.2 [20.0-31.0])        | 54/251 (21.5 [16.6-27.1])       | 27/130 (20.8 [14.2-28.8])      | 37/171 (21.6 [15.7-28.6])      |
| Mechanical Complications Associated with Central Lines                                      | 38/1561 (2.4 [1.7-3.3])           | 57/1451 (3.9 [3.0-5.1])          | 38/1401 (2.7 [1.9-3.7])         | 18/725 (2.5 [1.5-3.9])         | 18/871 (2.1 [1.2-3.3])         |
| Postoperative Cardiac Events (Cardiac and Non-cardiac Surgeries)                            | 72/9061 (0.8 [0.6-1.0])           | 78/9872 (0.8 [0.6-1.0])          | 72/8519 (0.8 [0.7-1.1])         | 31/4718 (0.7 [0.5-0.9])        | 29/5429 (0.5 [0.4-0.8])        |
| Postoperative Venous Thromboembolic Event                                                   | 38/9061 (0.4 [0.3-0.6])           | 34/9872 (0.3 [0.2-0.5])          | 37/8521 (0.4 [0.3-0.6])         | 21/4718 (0.4 [0.3-0.7])        | 24/5430 (0.4 [0.3-0.7])        |
| <b>Overall</b>                                                                              |                                   |                                  |                                 |                                |                                |
| Occurrence rate (exposure)                                                                  | 1853/95549 (1.9 [1.9-2.0])        | 1977/105160 (1.9 [1.8-2.0])      | 1611/90184 (1.8 [1.7-1.9])      | 731/49568 (1.5 [1.4-1.6])      | 803/56727 (1.4 [1.3-1.5])      |
| At-least one (discharge)                                                                    | 1219/9104 (13.4 [12.7-14.1])      | 1299/10148 (12.8 [12.2-13.5])    | 1110/8692 (12.8 [12.1-13.5])    | 512/4767 (10.7 [9.9-11.7])     | 558/5480 (10.2 [9.4-11.0])     |
| Number of AE (per 1,000 discharges)                                                         | 1853/9104 (203.5 [195.3-212.0])   | 1977/10148 (194.8 [187.2-202.7]) | 1611/8692 (185.3 [177.2-193.7]) | 731/4767 (153.3 [143.2-163.9]) | 803/5480 (146.5 [137.3-156.2]) |
| In-hospital mortality (%)                                                                   | 136/9104 (1.5 [1.3-1.8])          | 151/10148 (1.5 [1.3-1.7])        | 128/8692 (1.5 [1.2-1.8])        | 74/4767 (1.6 [1.2-1.9])        | 62/5480 (1.1 [0.9-1.5])        |
| Mean age (SD)                                                                               | 555744/9104 (61.0 [16.0])         | 619208/10148 (61.0 [15.6])       | 538095/8692 (61.9 [15.4])       | 297810/4767 (62.5 [15.1])      | 340707/5480 (62.2 [14.5])      |
| Mean LOS (SD)                                                                               | 49140/9104 (5.4 [6.1])            | 51107/10148 (5.0 [5.5])          | 45112/8692 (5.2 [5.4])          | 24246/4767 (5.1 [5.7])         | 26048/5480 (4.8 [5.0])         |
| Mean number of exposures (SD)                                                               | 10.5 (1.5)                        | 10.4 (1.5)                       | 10.4 (1.5)                      | 10.4 (1.5)                     | 10.4 (1.5)                     |

| Measure                          | 2010                              | 2011            | 2012            | 2013            | 2014            |
|----------------------------------|-----------------------------------|-----------------|-----------------|-----------------|-----------------|
|                                  | adverse events/exposures (% (CI)) |                 |                 |                 |                 |
| Median number of exposures (IQR) | 10.0 (9.0-11.0)                   | 10.0 (9.0-11.0) | 10.0 (9.0-11.0) | 10.0 (9.0-11.0) | 10.0 (9.0-11.0) |

## 2015-2019

| Measure                                                                             | 2015                              | 2016                      | 2017                      | 2018                     | 2019                     |
|-------------------------------------------------------------------------------------|-----------------------------------|---------------------------|---------------------------|--------------------------|--------------------------|
|                                                                                     | adverse events/exposures (% (CI)) |                           |                           |                          |                          |
| <b>Adverse Drug Events</b>                                                          |                                   |                           |                           |                          |                          |
| Adverse Events Associated with Digoxin                                              | 0/16 (0.0 [0.0-20.6])             | 0/28 (0.0 [0.0-12.3])     | 0/23 (0.0 [0.0-14.8])     | 0/13 (0.0 [0.0-24.7])    | 0/2 (0.0 [0.0-84.2])     |
| Adverse Events Associated with Hypoglycemic Agents                                  | 34/610 (5.6 [3.9-7.7])            | 52/1290 (4.0 [3.0-5.3])   | 36/919 (3.9 [2.8-5.4])    | 34/475 (7.2 [5.0-9.9])   | 27/435 (6.2 [4.1-8.9])   |
| Adverse Events Associated with IV Heparin                                           | 8/36 (22.2 [10.1-39.2])           | 22/125 (17.6 [11.4-25.4]) | 18/110 (16.4 [10.0-24.6]) | 12/63 (19.0 [10.3-30.9]) | 11/75 (14.7 [7.6-24.7])  |
| Adverse Events Associated with Low Molecular Weight Heparin and Factor Xa Inhibitor | 38/974 (3.9 [2.8-5.3])            | 67/1906 (3.5 [2.7-4.4])   | 33/1301 (2.5 [1.8-3.5])   | 14/565 (2.5 [1.4-4.1])   | 24/588 (4.1 [2.6-6.0])   |
| Adverse Events Associated with Warfarin                                             | 13/324 (4.0 [2.2-6.8])            | 20/599 (3.3 [2.1-5.1])    | 9/260 (3.5 [1.6-6.5])     | 5/130 (3.8 [1.3-8.8])    | 11/101 (10.9 [5.6-18.7]) |
| <b>General Adverse Events</b>                                                       |                                   |                           |                           |                          |                          |
| Hospital-Acquired Pressure Ulcers                                                   | 68/2817 (2.4 [1.9-3.1])           | 112/5920 (1.9 [1.6-2.3])  | 78/3880 (2.0 [1.6-2.5])   | 69/1930 (3.6 [2.8-4.5])  | 41/1861 (2.2 [1.6-3.0])  |
| Inpatient Falls                                                                     | 13/2817 (0.5 [0.3-0.8])           | 45/5920 (0.8 [0.6-1.0])   | 27/3880 (0.7 [0.5-1.0])   | 18/1930 (0.9 [0.6-1.5])  | 7/1861 (0.4 [0.2-0.8])   |
| <b>Hospital-Acquired Infections</b>                                                 |                                   |                           |                           |                          |                          |
| Hospital-Acquired Antibiotic-Associated Clostridium difficile                       | 9/2763 (0.3 [0.2-0.6])            | 23/5726 (0.4 [0.3-0.6])   | 10/3746 (0.3 [0.1-0.5])   | 5/1888 (0.3 [0.1-0.6])   | 3/1825 (0.2 [0.0-0.5])   |
| Central Line-Associated Blood Stream Infections                                     | 1/226 (0.4 [0.0-2.4])             | 0/510 (0.0 [0.0-0.7])     | 3/361 (0.8 [0.2-2.4])     | 1/206 (0.5 [0.0-2.7])    | 1/209 (0.5 [0.0-2.6])    |
| Catheter-Associated Urinary Tract Infections                                        | 32/2010 (1.6 [1.1-2.2])           | 57/4036 (1.4 [1.1-1.8])   | 37/2470 (1.5 [1.1-2.1])   | 16/1212 (1.3 [0.8-2.1])  | 9/1159 (0.8 [0.4-1.5])   |
| Hospital-Acquired Methicillin-Resistant Staphylococcus Aureus                       | 1/2786 (0.0 [0.0-0.2])            | 2/5865 (0.0 [0.0-0.1])    | 2/3848 (0.1 [0.0-0.2])    | 1/1920 (0.1 [0.0-0.3])   | 0/1843 (0.0 [0.0-0.2])   |

| Measure                                                                                     | 2015                              | 2016                           | 2017                           | 2018                           | 2019                           |
|---------------------------------------------------------------------------------------------|-----------------------------------|--------------------------------|--------------------------------|--------------------------------|--------------------------------|
|                                                                                             | adverse events/exposures (% (CI)) |                                |                                |                                |                                |
| Hospital-Acquired Vancomycin-Resistant Enterococcus                                         | 2/2809 (0.1 [0.0-0.3])            | 1/5916 (0.0 [0.0-0.1])         | 1/3872 (0.0 [0.0-0.1])         | 0/1926 (0.0 [0.0-0.2])         | 0/1856 (0.0 [0.0-0.2])         |
| Postoperative Pneumonia                                                                     | 38/2772 (1.4 [1.0-1.9])           | 66/5871 (1.1 [0.9-1.4])        | 42/3839 (1.1 [0.8-1.5])        | 30/1907 (1.6 [1.1-2.2])        | 23/1847 (1.2 [0.8-1.9])        |
| Ventilator-Associated Pneumonia                                                             | 4/41 (9.8 [2.7-23.1])             | 10/105 (9.5 [4.7-16.8])        | 7/79 (8.9 [3.6-17.4])          | 5/38 (13.2 [4.4-28.1])         | 2/41 (4.9 [0.6-16.5])          |
| <b>Post-Procedure Adverse Events</b>                                                        |                                   |                                |                                |                                |                                |
| Adverse Events Associated with Femoral Artery Puncture for Catheter Angiographic Procedures | 1/44 (2.3 [0.1-12.0])             | 0/77 (0.0 [0.0-4.7])           | 2/66 (3.0 [0.4-10.5])          | 2/42 (4.8 [0.6-16.2])          | 0/41 (0.0 [0.0-8.6])           |
| Adverse Events Associated with Hip Joint Replacement                                        | 24/610 (3.9 [2.5-5.8])            | 64/1311 (4.9 [3.8-6.2])        | 34/837 (4.1 [2.8-5.6])         | 22/451 (4.9 [3.1-7.3])         | 14/520 (2.7 [1.5-4.5])         |
| Adverse Events Associated with Knee Joint Replacement                                       | 20/969 (2.1 [1.3-3.2])            | 44/2159 (2.0 [1.5-2.7])        | 33/1339 (2.5 [1.7-3.4])        | 13/610 (2.1 [1.1-3.6])         | 15/468 (3.2 [1.8-5.2])         |
| Contrast Nephropathy Associated with Catheter Angiography                                   | 5/51 (9.8 [3.3-21.4])             | 24/109 (22.0 [14.7-31.0])      | 17/101 (16.8 [10.1-25.6])      | 13/64 (20.3 [11.3-32.2])       | 18/61 (29.5 [18.5-42.6])       |
| Mechanical Complications Associated with Central Lines                                      | 3/321 (0.9 [0.2-2.7])             | 22/675 (3.3 [2.1-4.9])         | 9/509 (1.8 [0.8-3.3])          | 9/280 (3.2 [1.5-6.0])          | 5/291 (1.7 [0.6-4.0])          |
| Postoperative Cardiac Events (Cardiac and Non-cardiac Surgeries)                            | 13/2796 (0.5 [0.3-0.8])           | 22/5919 (0.4 [0.2-0.6])        | 30/3879 (0.8 [0.5-1.1])        | 16/1928 (0.8 [0.5-1.3])        | 17/1860 (0.9 [0.5-1.5])        |
| Postoperative Venous Thromboembolic Event                                                   | 6/2796 (0.2 [0.1-0.5])            | 20/5919 (0.3 [0.2-0.5])        | 14/3879 (0.4 [0.2-0.6])        | 5/1928 (0.3 [0.1-0.6])         | 14/1860 (0.8 [0.4-1.3])        |
| <b>Overall</b>                                                                              |                                   |                                |                                |                                |                                |
| Occurrence rate (exposure)                                                                  | 333/28588 (1.2 [1.0-1.3])         | 673/59986 (1.1 [1.0-1.2])      | 442/39198 (1.1 [1.0-1.2])      | 290/19506 (1.5 [1.3-1.7])      | 242/18804 (1.3 [1.1-1.5])      |
| At-least one (discharge)                                                                    | 235/2817 (8.3 [7.4-9.4])          | 480/5920 (8.1 [7.4-8.8])       | 329/3880 (8.5 [7.6-9.4])       | 204/1930 (10.6 [9.2-12.0])     | 185/1861 (9.9 [8.6-11.4])      |
| Number of AE (per 1,000 discharges)                                                         | 333/2817 (118.2 [106.5-130.7])    | 673/5920 (113.7 [105.7-122.0]) | 442/3880 (113.9 [104.1-124.3]) | 290/1930 (150.3 [134.6-167.0]) | 242/1861 (130.0 [115.1-146.2]) |
| In-hospital mortality (%)                                                                   | 31/2817 (1.1 [0.8-1.6])           | 52/5920 (0.9 [0.7-1.2])        | 45/3880 (1.2 [0.9-1.6])        | 25/1930 (1.3 [0.8-1.9])        | 19/1861 (1.0 [0.6-1.6])        |
| Mean age (SD)                                                                               | 176992/2817 (62.8 [14.3])         | 370015/5920 (62.5 [14.9])      | 245289/3880 (63.2 [15.0])      | 124267/1930 (64.4 [14.5])      | 119026/1861 (64.0 [14.9])      |

| Measure                          | 2015                              | 2016                   | 2017                   | 2018                  | 2019                  |
|----------------------------------|-----------------------------------|------------------------|------------------------|-----------------------|-----------------------|
|                                  | adverse events/exposures (% (CI)) |                        |                        |                       |                       |
| Mean LOS (SD)                    | 12381/2817 (4.4 [4.8])            | 25561/5920 (4.3 [5.2]) | 16905/3880 (4.4 [5.1]) | 8854/1930 (4.6 [5.3]) | 8507/1861 (4.6 [5.7]) |
| Mean number of exposures (SD)    | 10.1 (1.3)                        | 10.1 (1.3)             | 10.1 (1.4)             | 10.1 (1.4)            | 10.1 (1.5)            |
| Median number of exposures (IQR) | 10.0 (9.0-11.0)                   | 10.0 (9.0-11.0)        | 10.0 (9.0-11.0)        | 10.0 (9.0-11.0)       | 10.0 (9.0-11.0)       |



**eTable 14.** MPSMS Adverse Event and Exposure Data for All-Other Conditions patients, 2012-2019<sup>40</sup>

**2012-2015**

| Measure                                                                             | 2012                              | 2013                     | 2014                     | 2015                     |
|-------------------------------------------------------------------------------------|-----------------------------------|--------------------------|--------------------------|--------------------------|
|                                                                                     | adverse events/exposures (% (CI)) |                          |                          |                          |
| <b>Adverse Drug Events</b>                                                          |                                   |                          |                          |                          |
| Adverse Events Associated with Digoxin                                              | 1/138 (0.7 [0.0-4.0])             | 0/65 (0.0 [0.0-5.5])     | 1/44 (2.3 [0.1-12.0])    | 0/71 (0.0 [0.0-5.1])     |
| Adverse Events Associated with Hypoglycemic Agents                                  | 164/2200 (7.5 [6.4-8.6])          | 89/1179 (7.5 [6.1-9.2])  | 67/941 (7.1 [5.6-9.0])   | 112/1470 (7.6 [6.3-9.1]) |
| Adverse Events Associated with IV Heparin                                           | 22/207 (10.6 [6.8-15.7])          | 11/111 (9.9 [5.1-17.0])  | 15/116 (12.9 [7.4-20.4]) | 12/121 (9.9 [5.2-16.7])  |
| Adverse Events Associated with Low Molecular Weight Heparin and Factor Xa Inhibitor | 39/1956 (2.0 [1.4-2.7])           | 21/1245 (1.7 [1.1-2.6])  | 20/1032 (1.9 [1.2-3.0])  | 17/1526 (1.1 [0.7-1.8])  |
| Adverse Events Associated with Warfarin                                             | 27/660 (4.1 [2.7-5.9])            | 16/368 (4.3 [2.5-7.0])   | 8/243 (3.3 [1.4-6.4])    | 17/337 (5.0 [3.0-8.0])   |
| <b>General Adverse Events</b>                                                       |                                   |                          |                          |                          |
| Hospital-Acquired Pressure Ulcers                                                   | 222/9532 (2.3 [2.0-2.7])          | 120/5286 (2.3 [1.9-2.7]) | 78/4308 (1.8 [1.4-2.3])  | 123/6072 (2.0 [1.7-2.4]) |
| Inpatient Falls                                                                     | 84/9532 (0.9 [0.7-1.1])           | 38/5286 (0.7 [0.5-1.0])  | 34/4308 (0.8 [0.6-1.1])  | 50/6072 (0.8 [0.6-1.1])  |
| <b>Hospital-Acquired Infections</b>                                                 |                                   |                          |                          |                          |
| Hospital-Acquired Antibiotic-Associated <i>Clostridium difficile</i>                | 11/6119 (0.2 [0.1-0.3])           | 8/3411 (0.2 [0.1-0.5])   | 11/2645 (0.4 [0.2-0.7])  | 14/3802 (0.4 [0.2-0.6])  |

<sup>40</sup> Note: the same adverse event may be counted twice in this table, e.g., some instances of ventilator-associated pneumonia may also be cases of postoperative pneumonia, but these adverse events are only counted once in the analyzed summary data presented in the text and figures in this paper

| Measure                                                                                     | 2012                              | 2013                        | 2014                        | 2015                        |
|---------------------------------------------------------------------------------------------|-----------------------------------|-----------------------------|-----------------------------|-----------------------------|
|                                                                                             | adverse events/exposures (% (CI)) |                             |                             |                             |
| Central Line-Associated Blood Stream Infections                                             | 2/279 (0.7 [0.1-2.6])             | 0/156 (0.0 [0.0-2.3])       | 1/116 (0.9 [0.0-4.7])       | 0/169 (0.0 [0.0-2.2])       |
| Catheter-Associated Urinary Tract Infections                                                | 54/2713 (2.0 [1.5-2.6])           | 35/1462 (2.4 [1.7-3.3])     | 15/1120 (1.3 [0.8-2.2])     | 29/1467 (2.0 [1.3-2.8])     |
| Hospital-Acquired Methicillin-Resistant Staphylococcus Aureus                               | 2/9310 (0.0 [0.0-0.1])            | 0/5172 (0.0 [0.0-0.1])      | 3/4236 (0.1 [0.0-0.2])      | 1/5944 (0.0 [0.0-0.1])      |
| Hospital-Acquired Vancomycin-Resistant Enterococcus                                         | 1/9485 (0.0 [0.0-0.1])            | 3/5273 (0.1 [0.0-0.2])      | 2/4292 (0.0 [0.0-0.2])      | 0/6040 (0.0 [0.0-0.1])      |
| Ventilator-Associated Pneumonia                                                             | 5/59 (8.5 [2.8-18.7])             | 2/27 (7.4 [0.9-24.3])       | 3/29 (10.3 [2.2-27.4])      | 4/64 (6.3 [1.7-15.2])       |
| <b>Post-Procedure Adverse Events</b>                                                        |                                   |                             |                             |                             |
| Adverse Events Associated with Femoral Artery Puncture for Catheter Angiographic Procedures | 3/142 (2.1 [0.4-6.1])             | 1/86 (1.2 [0.0-6.3])        | 3/77 (3.9 [0.8-11.0])       | 2/122 (1.6 [0.2-5.8])       |
| Contrast Nephropathy Associated with Catheter Angiography                                   | 14/160 (8.8 [4.9-14.3])           | 7/100 (7.0 [2.9-13.9])      | 9/97 (9.3 [4.3-16.9])       | 10/134 (7.5 [3.6-13.3])     |
| Mechanical Complications Associated with Central Lines                                      | 16/549 (2.9 [1.7-4.7])            | 10/318 (3.1 [1.5-5.7])      | 5/240 (2.1 [0.7-4.8])       | 11/418 (2.6 [1.3-4.7])      |
| <b>Overall</b>                                                                              |                                   |                             |                             |                             |
| Occurrence rate (exposure)                                                                  | 667/53041 (1.3 [1.2-1.4])         | 361/29545 (1.2 [1.1-1.4])   | 275/23844 (1.2 [1.0-1.3])   | 402/33829 (1.2 [1.1-1.3])   |
| At-least one (discharge)                                                                    | 588/9532 (6.2 [5.7-6.7])          | 312/5286 (5.9 [5.3-6.6])    | 237/4308 (5.5 [4.8-6.2])    | 349/6072 (5.7 [5.2-6.4])    |
| Number of AE (per 1,000 discharges)                                                         | 667/9532 (70.0 [64.9-75.3])       | 361/5286 (68.3 [61.6-75.4]) | 275/4308 (63.8 [56.7-71.6]) | 402/6072 (66.2 [60.1-72.8]) |
| In-hospital mortality (%)                                                                   | 111/9532 (1.2 [1.0-1.4])          | 68/5286 (1.3 [1.0-1.6])     | 62/4308 (1.4 [1.1-1.8])     | 97/6072 (1.6 [1.3-2.0])     |
| Mean age (SD)                                                                               | 542707/9532 (56.9 [20.6])         | 298657/5286 (56.5 [20.4])   | 240300/4308 (55.8 [20.8])   | 347955/6072 (57.3 [21.2])   |
| Mean LOS (SD)                                                                               | 36553/9532 (3.8 [4.3])            | 20339/5286 (3.8 [4.4])      | 15827/4308 (3.7 [4.1])      | 23455/6072 (3.9 [4.2])      |

| Measure                          | 2012                              | 2013          | 2014          | 2015          |
|----------------------------------|-----------------------------------|---------------|---------------|---------------|
|                                  | adverse events/exposures (% (CI)) |               |               |               |
| Mean number of exposures (SD)    | 5.6 (1.2)                         | 5.6 (1.2)     | 5.5 (1.2)     | 5.6 (1.2)     |
| Median number of exposures (IQR) | 5.0 (5.0-6.0)                     | 5.0 (5.0-6.0) | 5.0 (5.0-6.0) | 5.0 (5.0-6.0) |

## 2015-2019

| Measure                                                                             | 2016                              | 2017                     | 2018                     | 2019                     |
|-------------------------------------------------------------------------------------|-----------------------------------|--------------------------|--------------------------|--------------------------|
|                                                                                     | adverse events/exposures (% (CI)) |                          |                          |                          |
| <b>Adverse Drug Events</b>                                                          |                                   |                          |                          |                          |
| Adverse Events Associated with Digoxin                                              | 0/71 (0.0 [0.0-5.1])              | 1/74 (1.4 [0.0-7.3])     | 0/78 (0.0 [0.0-4.6])     | 0/47 (0.0 [0.0-7.6])     |
| Adverse Events Associated with Hypoglycemic Agents                                  | 116/1670 (6.9 [5.8-8.3])          | 117/1920 (6.1 [5.1-7.3]) | 161/1950 (8.3 [7.1-9.6]) | 77/1517 (5.1 [4.0-6.3])  |
| Adverse Events Associated with IV Heparin                                           | 15/147 (10.2 [5.8-16.3])          | 11/197 (5.6 [2.8-9.8])   | 12/228 (5.3 [2.8-9.0])   | 9/163 (5.5 [2.6-10.2])   |
| Adverse Events Associated with Low Molecular Weight Heparin and Factor Xa Inhibitor | 29/1830 (1.6 [1.1-2.3])           | 31/2022 (1.5 [1.0-2.2])  | 27/2076 (1.3 [0.9-1.9])  | 21/1630 (1.3 [0.8-2.0])  |
| Adverse Events Associated with Warfarin                                             | 17/323 (5.3 [3.1-8.3])            | 11/341 (3.2 [1.6-5.7])   | 16/284 (5.6 [3.3-9.0])   | 7/183 (3.8 [1.6-7.7])    |
| <b>General Adverse Events</b>                                                       |                                   |                          |                          |                          |
| Hospital-Acquired Pressure Ulcers                                                   | 151/7114 (2.1 [1.8-2.5])          | 170/7912 (2.1 [1.8-2.5]) | 211/7895 (2.7 [2.3-3.1]) | 174/6139 (2.8 [2.4-3.3]) |
| Inpatient Falls                                                                     | 53/7114 (0.7 [0.6-1.0])           | 61/7912 (0.8 [0.6-1.0])  | 75/7895 (0.9 [0.8-1.2])  | 54/6139 (0.9 [0.7-1.2])  |
| <b>Hospital-Acquired Infections</b>                                                 |                                   |                          |                          |                          |
| Hospital-Acquired Antibiotic-Associated Clostridium difficile                       | 14/4433 (0.3 [0.2-0.5])           | 11/4996 (0.2 [0.1-0.4])  | 12/4956 (0.2 [0.1-0.4])  | 10/3928 (0.3 [0.1-0.5])  |

| Measure                                                                                     | 2016                              | 2017                        | 2018                        | 2019                        |
|---------------------------------------------------------------------------------------------|-----------------------------------|-----------------------------|-----------------------------|-----------------------------|
|                                                                                             | adverse events/exposures (% (CI)) |                             |                             |                             |
| Central Line-Associated Blood Stream Infections                                             | 2/212 (0.9 [0.1-3.4])             | 1/235 (0.4 [0.0-2.4])       | 0/248 (0.0 [0.0-1.5])       | 1/205 (0.5 [0.0-2.7])       |
| Catheter-Associated Urinary Tract Infections                                                | 32/1721 (1.9 [1.3-2.6])           | 33/1796 (1.8 [1.3-2.6])     | 33/1832 (1.8 [1.2-2.5])     | 27/1437 (1.9 [1.2-2.7])     |
| Hospital-Acquired Methicillin-Resistant Staphylococcus Aureus                               | 0/6962 (0.0 [0.0-0.1])            | 4/7748 (0.1 [0.0-0.1])      | 0/7743 (0.0 [0.0-0.1])      | 0/6026 (0.0 [0.0-0.1])      |
| Hospital-Acquired Vancomycin-Resistant Enterococcus                                         | 1/7092 (0.0 [0.0-0.1])            | 0/7876 (0.0 [0.0-0.1])      | 3/7872 (0.0 [0.0-0.1])      | 1/6126 (0.0 [0.0-0.1])      |
| Ventilator-Associated Pneumonia                                                             | 4/67 (6.0 [1.7-14.6])             | 6/82 (7.3 [2.7-15.3])       | 8/88 (9.1 [4.0-17.1])       | 11/75 (14.7 [7.6-24.7])     |
| <b>Post-Procedure Adverse Events</b>                                                        |                                   |                             |                             |                             |
| Adverse Events Associated with Femoral Artery Puncture for Catheter Angiographic Procedures | 0/127 (0.0 [0.0-2.9])             | 3/145 (2.1 [0.4-5.9])       | 6/164 (3.7 [1.4-7.8])       | 4/101 (4.0 [1.1-9.8])       |
| Contrast Nephropathy Associated with Catheter Angiography                                   | 8/153 (5.2 [2.3-10.0])            | 14/177 (7.9 [4.4-12.9])     | 22/213 (10.3 [6.6-15.2])    | 17/145 (11.7 [7.0-18.1])    |
| Mechanical Complications Associated with Central Lines                                      | 12/500 (2.4 [1.3-4.2])            | 14/613 (2.3 [1.3-3.8])      | 19/661 (2.9 [1.7-4.5])      | 18/519 (3.5 [2.1-5.4])      |
| <b>Overall</b>                                                                              |                                   |                             |                             |                             |
| Occurrence rate (exposure)                                                                  | 454/39536 (1.1 [1.1-1.3])         | 488/44046 (1.1 [1.0-1.2])   | 605/44183 (1.4 [1.3-1.5])   | 431/34380 (1.3 [1.1-1.4])   |
| At-least one (discharge)                                                                    | 398/7114 (5.6 [5.1-6.2])          | 435/7912 (5.5 [5.0-6.0])    | 524/7895 (6.6 [6.1-7.2])    | 380/6139 (6.2 [5.6-6.8])    |
| Number of AE (per 1,000 discharges)                                                         | 454/7114 (63.8 [58.3-69.8])       | 488/7912 (61.7 [56.5-67.2]) | 605/7895 (76.6 [70.9-82.7]) | 431/6139 (70.2 [63.9-76.9]) |
| In-hospital mortality (%)                                                                   | 160/7114 (2.2 [1.9-2.6])          | 168/7912 (2.1 [1.8-2.5])    | 161/7895 (2.0 [1.7-2.4])    | 106/6139 (1.7 [1.4-2.1])    |
| Mean age (SD)                                                                               | 414176/7114 (58.2 [20.7])         | 463316/7912 (58.6 [20.7])   | 462496/7895 (58.6 [20.5])   | 362853/6139 (59.1 [20.2])   |
| Mean LOS (SD)                                                                               | 27711/7114 (3.9 [4.4])            | 31722/7912 (4.0 [4.4])      | 31827/7895 (4.0 [4.4])      | 25425/6139 (4.1 [5.1])      |

| Measure                          | 2016                              | 2017          | 2018          | 2019          |
|----------------------------------|-----------------------------------|---------------|---------------|---------------|
|                                  | adverse events/exposures (% (CI)) |               |               |               |
| Mean number of exposures (SD)    | 5.6 (1.2)                         | 5.6 (1.2)     | 5.6 (1.2)     | 5.6 (1.2)     |
| Median number of exposures (IQR) | 5.0 (5.0-6.0)                     | 5.0 (5.0-6.0) | 5.0 (5.0-6.0) | 5.0 (5.0-6.0) |

**eTable 15.** Table Containing the Data in Figure 1

| Domain                       | Condition            | 2010                     | 2011               | 2012             | 2013             | 2014             | 2015             | 2016             | 2017             | 2018             | 2019             |
|------------------------------|----------------------|--------------------------|--------------------|------------------|------------------|------------------|------------------|------------------|------------------|------------------|------------------|
|                              |                      | adverse events/exposures |                    |                  |                  |                  |                  |                  |                  |                  |                  |
| Adverse Drug Events          | AMI                  | 657/7727<br>(85)         | 608/7113<br>(86)   | 401/4934<br>(81) | 293/4027<br>(73) | 326/4234<br>(77) | 218/4076<br>(54) | 165/3797<br>(44) | 103/2651<br>(39) | 70/1681<br>(42)  | 13/567<br>(23)   |
|                              | HF                   | 602/7536<br>(80)         | 541/6962<br>(78)   | 317/4900<br>(65) | 266/4492<br>(59) | 332/4820<br>(69) | 142/2423<br>(59) | 206/5330<br>(39) | 186/3779<br>(49) | 84/1739<br>(48)  | 32/774<br>(41)   |
|                              | PNE                  | 666/9311<br>(72)         | 747/9744<br>(77)   | 574/8730<br>(66) | 294/4666<br>(63) | 301/4941<br>(61) | 120/2427<br>(49) | 259/5737<br>(45) | 154/4004<br>(39) | 80/1707<br>(47)  | 33/858<br>(39)   |
|                              | SCIP                 | 615/9104<br>(68)         | 643/1014<br>8 (63) | 494/8692<br>(57) | 238/4767<br>(50) | 251/5480<br>(46) | 93/2817<br>(33)  | 161/5920<br>(27) | 96/3880<br>(25)  | 65/1930<br>(34)  | 73/1861<br>(39)  |
|                              | All-Other Conditions |                          |                    | 253/9532<br>(27) | 137/5286<br>(26) | 111/4308<br>(26) | 158/6072<br>(26) | 177/7114<br>(25) | 171/7910<br>(22) | 216/7895<br>(27) | 114/6138<br>(19) |
| General Adverse Events       | AMI                  | 309/7727<br>(40)         | 331/7113<br>(47)   | 197/4934<br>(40) | 136/4027<br>(34) | 129/4234<br>(31) | 132/4076<br>(32) | 90/3797<br>(24)  | 61/2651<br>(23)  | 48/1681<br>(29)  | 16/567<br>(28)   |
|                              | HF                   | 429/7536<br>(57)         | 387/6962<br>(56)   | 272/4900<br>(56) | 223/4492<br>(50) | 246/4820<br>(51) | 130/2423<br>(54) | 240/5330<br>(45) | 184/3779<br>(49) | 96/1739<br>(55)  | 36/774<br>(47)   |
|                              | PNE                  | 839/9311<br>(90)         | 821/9744<br>(84)   | 715/8730<br>(82) | 331/4666<br>(71) | 352/4941<br>(71) | 160/2427<br>(66) | 368/5737<br>(64) | 234/4004<br>(58) | 117/1707<br>(69) | 54/858<br>(63)   |
|                              | SCIP                 | 369/9104<br>(41)         | 417/1014<br>8 (41) | 369/8692<br>(43) | 158/4767<br>(33) | 168/5480<br>(31) | 81/2817<br>(29)  | 157/5920<br>(27) | 105/3880<br>(27) | 87/1930<br>(45)  | 48/1861<br>(26)  |
|                              | All-Other Conditions |                          |                    | 306/9532<br>(32) | 158/5286<br>(30) | 112/4308<br>(26) | 173/6072<br>(29) | 204/7114<br>(29) | 231/7910<br>(29) | 286/7895<br>(36) | 228/6138<br>(37) |
| Hospital-Acquired Infections | AMI                  | 204/7727<br>(26)         | 171/7113<br>(24)   | 106/4934<br>(22) | 79/4027<br>(20)  | 74/4234<br>(18)  | 61/4076<br>(15)  | 32/3797<br>(8)   | 29/2651<br>(11)  | 17/1681<br>(10)  | 9/567<br>(16)    |
|                              | HF                   | 159/7536<br>(21)         | 142/6962<br>(20)   | 91/4900<br>(19)  | 72/4492<br>(16)  | 79/4820<br>(16)  | 30/2423<br>(12)  | 69/5330<br>(13)  | 46/3779<br>(12)  | 23/1739<br>(13)  | 9/774<br>(12)    |
|                              | PNE                  | 230/9311<br>(25)         | 217/9744<br>(22)   | 177/8730<br>(20) | 118/4666<br>(25) | 105/4941<br>(21) | 42/2427<br>(17)  | 82/5737<br>(14)  | 55/4004<br>(14)  | 25/1707<br>(15)  | 13/858<br>(15)   |
|                              | SCIP                 | 431/9104<br>(47)         | 436/1014<br>8 (43) | 374/8692<br>(43) | 166/4767<br>(35) | 189/5480<br>(35) | 87/2817<br>(31)  | 159/5920<br>(27) | 102/3880<br>(26) | 58/1930<br>(30)  | 38/1861<br>(20)  |
|                              | All-Other Conditions |                          |                    | 75/9532<br>(8)   | 48/5286<br>(9)   | 35/4308<br>(8)   | 48/6072<br>(8)   | 53/7114<br>(8)   | 55/7910<br>(7)   | 56/7895<br>(7)   | 50/6138<br>(8)   |
|                              | AMI                  | 513/7727<br>(66)         | 463/7113<br>(65)   | 328/4934<br>(67) | 275/4027<br>(68) | 317/4234<br>(75) | 272/4076<br>(67) | 225/3797<br>(59) | 145/2651<br>(55) | 146/1681<br>(87) | 41/567<br>(72)   |

| Domain                                                     | Condition               | 2010                     | 2011               | 2012             | 2013             | 2014             | 2015            | 2016             | 2017             | 2018            | 2019            |
|------------------------------------------------------------|-------------------------|--------------------------|--------------------|------------------|------------------|------------------|-----------------|------------------|------------------|-----------------|-----------------|
|                                                            |                         | adverse events/exposures |                    |                  |                  |                  |                 |                  |                  |                 |                 |
| Post-Procedure<br>Adverse<br>Events                        | HF                      | 76/7536<br>(10)          | 67/6962<br>(10)    | 48/4900<br>(10)  | 45/4492<br>(10)  | 46/4820<br>(10)  | 23/2423<br>(10) | 29/5330<br>(5)   | 29/3779<br>(8)   | 16/1739<br>(9)  | 13/774<br>(17)  |
|                                                            | PNE                     | 84/9311<br>(9)           | 82/9744<br>(8)     | 77/8730<br>(9)   | 40/4666<br>(9)   | 56/4941<br>(11)  | 12/2427<br>(5)  | 42/5737<br>(7)   | 26/4004<br>(7)   | 16/1707<br>(9)  | 2/858 (2)       |
|                                                            | SCIP                    | 438/9104<br>(48)         | 489/1014<br>8 (48) | 374/8692<br>(43) | 169/4767<br>(36) | 195/5480<br>(36) | 72/2817<br>(26) | 196/5920<br>(33) | 139/3880<br>(36) | 80/1930<br>(42) | 83/1861<br>(45) |
|                                                            | All-Other<br>Conditions |                          |                    | 33/9532<br>(4)   | 18/5286<br>(3)   | 17/4308<br>(4)   | 23/6072<br>(4)  | 20/7114<br>(3)   | 31/7910<br>(4)   | 47/7895<br>(6)  | 39/6138<br>(6)  |
| All-Other Conditions Data was not available prior to 2012. |                         |                          |                    |                  |                  |                  |                 |                  |                  |                 |                 |

**eTable 16.** Table Containing the Data in Figure 4

| Domain              | Condition            | Index                                          | OR 95CI          |
|---------------------|----------------------|------------------------------------------------|------------------|
| All Adverse Events  | AMI                  | Occurrence of adverse events                   | 0.93 (0.92-0.94) |
|                     |                      | One or more adverse events per hospitalization | 0.92 (0.91-0.93) |
|                     |                      | # of adverse events per 1,000 hospitalizations | 0.94 (0.93-0.94) |
|                     | HF                   | Occurrence of adverse events                   | 0.95 (0.94-0.96) |
|                     |                      | One or more adverse events per hospitalization | 0.94 (0.93-0.95) |
|                     |                      | # of adverse events per 1,000 hospitalizations | 0.95 (0.94-0.96) |
|                     | PNE                  | Occurrence of adverse events                   | 0.94 (0.93-0.95) |
|                     |                      | One or more adverse events per hospitalization | 0.93 (0.92-0.94) |
|                     |                      | # of adverse events per 1,000 hospitalizations | 0.94 (0.93-0.95) |
|                     | SCIP                 | Occurrence of adverse events                   | 0.92 (0.91-0.93) |
|                     |                      | One or more adverse events per hospitalization | 0.92 (0.91-0.93) |
|                     |                      | # of adverse events per 1,000 hospitalizations | 0.93 (0.92-0.94) |
|                     | All-Other Conditions | Occurrence of adverse events                   | 0.97 (0.96-0.99) |
|                     |                      | One or more adverse events per hospitalization | 0.97 (0.96-0.99) |
|                     |                      | # of adverse events per 1,000 hospitalizations | 0.97 (0.96-0.99) |
| Adverse Drug Events | AMI                  | Occurrence of adverse events                   | 0.89 (0.88-0.91) |
|                     |                      | One or more adverse events per hospitalization | 0.88 (0.87-0.90) |
|                     |                      | # of adverse events per 1,000 hospitalizations | 0.90 (0.89-0.92) |
|                     | HF                   | Occurrence of adverse events                   | 0.94 (0.92-0.95) |
|                     |                      | One or more adverse events per hospitalization | 0.92 (0.91-0.94) |



| Domain                                         | Condition                                      | Index                                          | OR 95CI                                        |                  |
|------------------------------------------------|------------------------------------------------|------------------------------------------------|------------------------------------------------|------------------|
|                                                | PNE                                            | # of adverse events per 1,000 hospitalizations | 0.94 (0.93-0.96)                               |                  |
|                                                |                                                | Occurrence of adverse events                   | 0.93 (0.91-0.95)                               |                  |
|                                                |                                                | One or more adverse events per hospitalization | 0.92 (0.91-0.94)                               |                  |
|                                                | SCIP                                           | # of adverse events per 1,000 hospitalizations | 0.94 (0.92-0.95)                               |                  |
|                                                |                                                | Occurrence of adverse events                   | 0.91 (0.90-0.93)                               |                  |
|                                                |                                                | One or more adverse events per hospitalization | 0.90 (0.89-0.92)                               |                  |
|                                                |                                                | # of adverse events per 1,000 hospitalizations | 0.93 (0.91-0.94)                               |                  |
|                                                |                                                | All-Other Conditions                           | Occurrence of adverse events                   | 0.95 (0.93-0.97) |
|                                                |                                                |                                                | One or more adverse events per hospitalization | 0.94 (0.92-0.97) |
|                                                | # of adverse events per 1,000 hospitalizations |                                                | 0.95 (0.93-0.97)                               |                  |
|                                                | General Adverse Events                         | AMI                                            | Occurrence of adverse events                   | 0.93 (0.91-0.95) |
|                                                |                                                |                                                | One or more adverse events per hospitalization | 0.92 (0.90-0.95) |
| # of adverse events per 1,000 hospitalizations |                                                |                                                | 0.93 (0.91-0.95)                               |                  |
| HF                                             |                                                | Occurrence of adverse events                   | 0.97 (0.96-0.99)                               |                  |
|                                                |                                                | One or more adverse events per hospitalization | 0.97 (0.95-0.99)                               |                  |
|                                                |                                                | # of adverse events per 1,000 hospitalizations | 0.97 (0.96-0.99)                               |                  |
| PNE                                            |                                                | Occurrence of adverse events                   | 0.95 (0.93-0.96)                               |                  |
|                                                |                                                | One or more adverse events per hospitalization | 0.95 (0.93-0.96)                               |                  |
|                                                |                                                | # of adverse events per 1,000 hospitalizations | 0.95 (0.94-0.96)                               |                  |
| SCIP                                           |                                                | Occurrence of adverse events                   | 0.94 (0.92-0.95)                               |                  |
|                                                |                                                | One or more adverse events per hospitalization | 0.94 (0.92-0.95)                               |                  |
|                                                |                                                | # of adverse events per 1,000 hospitalizations | 0.94 (0.92-0.96)                               |                  |

| Domain                        | Condition            | Index                                          | OR 95CI          |
|-------------------------------|----------------------|------------------------------------------------|------------------|
|                               | All-Other Conditions | Occurrence of adverse events                   | 0.99 (0.97-1.01) |
|                               |                      | One or more adverse events per hospitalization | 0.99 (0.97-1.01) |
|                               |                      | # of adverse events per 1,000 hospitalizations | 0.99 (0.97-1.01) |
| Hospital-Acquired Infections  | AMI                  | Occurrence of adverse events                   | 0.88 (0.85-0.90) |
|                               |                      | One or more adverse events per hospitalization | 0.86 (0.83-0.89) |
|                               |                      | # of adverse events per 1,000 hospitalizations | 0.88 (0.86-0.90) |
|                               | HF                   | Occurrence of adverse events                   | 0.93 (0.90-0.96) |
|                               |                      | One or more adverse events per hospitalization | 0.92 (0.89-0.95) |
|                               |                      | # of adverse events per 1,000 hospitalizations | 0.93 (0.91-0.95) |
|                               | PNE                  | Occurrence of adverse events                   | 0.93 (0.90-0.95) |
|                               |                      | One or more adverse events per hospitalization | 0.93 (0.90-0.95) |
|                               |                      | # of adverse events per 1,000 hospitalizations | 0.93 (0.91-0.95) |
|                               | SCIP                 | Occurrence of adverse events                   | 0.92 (0.90-0.94) |
|                               |                      | One or more adverse events per hospitalization | 0.91 (0.89-0.93) |
|                               |                      | # of adverse events per 1,000 hospitalizations | 0.92 (0.90-0.94) |
|                               | All-Other Conditions | Occurrence of adverse events                   | 0.95 (0.91-0.99) |
|                               |                      | One or more adverse events per hospitalization | 0.95 (0.91-0.99) |
|                               |                      | # of adverse events per 1,000 hospitalizations | 0.95 (0.92-0.98) |
| Post-Procedure Adverse Events | AMI                  | Occurrence of adverse events                   | 0.99 (0.98-1.01) |
|                               |                      | One or more adverse events per hospitalization | 0.96 (0.95-0.98) |
|                               |                      | # of adverse events per 1,000 hospitalizations | 1.00 (0.98-1.01) |
|                               | HF                   | Occurrence of adverse events                   | 1.00 (0.96-1.04) |

| Domain | Condition            | Index                                          | OR 95CI          |
|--------|----------------------|------------------------------------------------|------------------|
|        |                      | One or more adverse events per hospitalization | 0.98 (0.94-1.02) |
|        |                      | # of adverse events per 1,000 hospitalizations | 1.00 (0.97-1.04) |
|        | PNE                  | Occurrence of adverse events                   | 0.96 (0.92-1.00) |
|        |                      | One or more adverse events per hospitalization | 0.95 (0.91-0.99) |
|        |                      | # of adverse events per 1,000 hospitalizations | 0.96 (0.93-1.00) |
|        | SCIP                 | Occurrence of adverse events                   | 0.94 (0.93-0.96) |
|        |                      | One or more adverse events per hospitalization | 0.94 (0.92-0.96) |
|        |                      | # of adverse events per 1,000 hospitalizations | 0.95 (0.93-0.96) |
|        | All-Other Conditions | Occurrence of adverse events                   | 1.03 (0.97-1.09) |
|        |                      | One or more adverse events per hospitalization | 1.02 (0.96-1.09) |
|        |                      | # of adverse events per 1,000 hospitalizations | 1.03 (0.98-1.09) |

**eTable 17.** Observed In-hospital Mortality Data for Patients Experiencing and not Experiencing each of the 21 MPSMS Adverse Events<sup>41</sup>

**Four Conditions, 2010-2015:**

| MPSMS Adverse Event Type             | 2010 Deaths in patients with this AE |       |       | 2010 Deaths in patients without this AE |       |      | 2011 Deaths in patients with this AE |       |      | 2011 Deaths in patients without this AE |       |      | 2012 Deaths in patients with this AE |       |      | 2012 Deaths in patients without this AE |       |      | 2013 Deaths in patients with this AE |       |      | 2013 Deaths in patients without this AE |       |      | 2014 Deaths in patients with this AE |       |      | 2014 Deaths in patients without this AE |       |      | 2015 Deaths in patients with this AE |       |      | 2015 Deaths in patients without this AE |       |      |
|--------------------------------------|--------------------------------------|-------|-------|-----------------------------------------|-------|------|--------------------------------------|-------|------|-----------------------------------------|-------|------|--------------------------------------|-------|------|-----------------------------------------|-------|------|--------------------------------------|-------|------|-----------------------------------------|-------|------|--------------------------------------|-------|------|-----------------------------------------|-------|------|--------------------------------------|-------|------|-----------------------------------------|-------|------|
|                                      | HM                                   | Total | Rate  | HM                                      | Total | Rate | HM                                   | Total | Rate | HM                                      | Total | Rate | HM                                   | Total | Rate | HM                                      | Total | Rate | HM                                   | Total | Rate | HM                                      | Total | Rate | HM                                   | Total | Rate | HM                                      | Total | Rate | HM                                   | Total | Rate | HM                                      | Total | Rate |
| <b>Adverse Drug Events</b>           |                                      |       |       |                                         |       |      |                                      |       |      |                                         |       |      |                                      |       |      |                                         |       |      |                                      |       |      |                                         |       |      |                                      |       |      |                                         |       |      |                                      |       |      |                                         |       |      |
| Digixon AE                           | 3                                    | 11    | 27.27 | 127                                     | 1629  | 7.8  | 5                                    | 9     | 55.6 | 107                                     | 1381  | 7.7  | 2                                    | 7     | 28.6 | 81                                      | 1039  | 7.8  | 2                                    | 5     | 40.0 | 44                                      | 667   | 6.6  | 4                                    | 6     | 66.7 | 44                                      | 634   | 6.9  | 1                                    | 2     | 50.0 | 24                                      | 292   | 8.2  |
| Hypoglycemic AE                      | 125                                  | 1236  | 10.11 | 641                                     | 10920 | 5.9  | 118                                  | 1216  | 9.7  | 589                                     | 10672 | 5.5  | 88                                   | 819   | 10.7 | 476                                     | 8613  | 5.5  | 44                                   | 542   | 8.1  | 295                                     | 5846  | 5.0  | 55                                   | 596   | 9.2  | 304                                     | 6206  | 4.9  | 22                                   | 287   | 7.7  | 146                                     | 3605  | 4.0  |
| IV Heparin AE                        | 55                                   | 364   | 15.11 | 148                                     | 2672  | 5.5  | 55                                   | 344   | 16.0 | 139                                     | 2679  | 5.2  | 53                                   | 257   | 20.6 | 117                                     | 2007  | 5.8  | 31                                   | 176   | 17.6 | 75                                      | 1615  | 4.6  | 41                                   | 219   | 18.7 | 109                                     | 1751  | 6.2  | 25                                   | 115   | 21.7 | 64                                      | 1417  | 4.5  |
| LMWH, etc., AE                       | 85                                   | 641   | 13.26 | 483                                     | 12700 | 3.8  | 94                                   | 659   | 14.3 | 436                                     | 13112 | 3.3  | 49                                   | 495   | 9.9  | 333                                     | 10335 | 3.2  | 32                                   | 241   | 13.3 | 220                                     | 6923  | 3.2  | 31                                   | 272   | 11.4 | 216                                     | 7455  | 2.9  | 17                                   | 115   | 14.8 | 108                                     | 4415  | 2.4  |
| Warfarin AEs                         | 26                                   | 288   | 9.03  | 91                                      | 4961  | 1.8  | 48                                   | 311   | 15.4 | 92                                      | 4769  | 1.9  | 26                                   | 208   | 12.5 | 72                                      | 3642  | 2.0  | 26                                   | 127   | 20.5 | 38                                      | 2391  | 1.6  | 21                                   | 117   | 17.9 | 46                                      | 2324  | 2.0  | 9                                    | 54    | 16.7 | 25                                      | 1186  | 2.1  |
| <b>General Adverse Events</b>        |                                      |       |       |                                         |       |      |                                      |       |      |                                         |       |      |                                      |       |      |                                         |       |      |                                      |       |      |                                         |       |      |                                      |       |      |                                         |       |      |                                      |       |      |                                         |       |      |
| HAPU                                 | 216                                  | 1624  | 13.30 | 1336                                    | 32054 | 4.2  | 239                                  | 1642  | 14.6 | 1301                                    | 32325 | 4.0  | 162                                  | 1322  | 12.3 | 1084                                    | 25934 | 4.2  | 90                                   | 693   | 13.0 | 678                                     | 17259 | 3.9  | 80                                   | 712   | 11.2 | 746                                     | 18763 | 4.0  | 47                                   | 424   | 11.1 | 405                                     | 11319 | 3.6  |
| Inpatient Falls                      | 30                                   | 322   | 9.32  | 1522                                    | 33356 | 4.6  | 25                                   | 314   | 8.0  | 1515                                    | 33653 | 4.5  | 9                                    | 231   | 3.9  | 1237                                    | 27025 | 4.6  | 14                                   | 155   | 9.0  | 754                                     | 17797 | 4.2  | 12                                   | 183   | 6.6  | 814                                     | 19292 | 4.2  | 3                                    | 79    | 3.8  | 449                                     | 11664 | 3.8  |
| <b>Hospital-Acquired Infections</b>  |                                      |       |       |                                         |       |      |                                      |       |      |                                         |       |      |                                      |       |      |                                         |       |      |                                      |       |      |                                         |       |      |                                      |       |      |                                         |       |      |                                      |       |      |                                         |       |      |
| C diff                               | 21                                   | 111   | 18.92 | 1251                                    | 24829 | 5.0  | 23                                   | 133   | 17.3 | 1262                                    | 25725 | 4.9  | 14                                   | 113   | 12.4 | 1019                                    | 21351 | 4.8  | 11                                   | 71    | 15.5 | 603                                     | 12885 | 4.7  | 9                                    | 70    | 12.9 | 659                                     | 13955 | 4.7  | 4                                    | 32    | 12.5 | 351                                     | 7653  | 4.6  |
| CLABSI                               | 9                                    | 29    | 31.03 | 231                                     | 2574  | 9.0  | 9                                    | 29    | 31.0 | 229                                     | 2195  | 10.4 | 6                                    | 24    | 25.0 | 176                                     | 1906  | 9.2  | 4                                    | 8     | 50.0 | 137                                     | 1257  | 10.9 | 3                                    | 5     | 60.0 | 126                                     | 1480  | 8.5  | 0                                    | 2     | 0.0  | 84                                      | 772   | 10.9 |
| CAUTI                                | 44                                   | 544   | 8.09  | 889                                     | 14627 | 6.1  | 42                                   | 487   | 8.6  | 891                                     | 15137 | 5.9  | 31                                   | 358   | 8.7  | 739                                     | 12241 | 6.0  | 23                                   | 218   | 10.6 | 428                                     | 7106  | 6.0  | 12                                   | 204   | 5.9  | 463                                     | 7811  | 5.9  | 9                                    | 110   | 8.2  | 255                                     | 4084  | 6.2  |
| MRSA                                 | 2                                    | 20    | 10.00 | 1429                                    | 32685 | 4.4  | 10                                   | 20    | 50.0 | 1405                                    | 32988 | 4.3  | 2                                    | 11    | 18.2 | 1157                                    | 26412 | 4.4  | 0                                    | 8     | 0.0  | 718                                     | 17502 | 4.1  | 2                                    | 12    | 16.7 | 783                                     | 19054 | 4.1  | 3                                    | 4     | 75.0 | 428                                     | 11498 | 3.7  |
| VRE                                  | 10                                   | 20    | 50.00 | 1519                                    | 33522 | 4.5  | 4                                    | 8     | 50.0 | 1518                                    | 33816 | 4.5  | 2                                    | 5     | 40.0 | 1227                                    | 27126 | 4.5  | 3                                    | 8     | 37.5 | 751                                     | 17850 | 4.2  | 5                                    | 10    | 50.0 | 811                                     | 19372 | 4.2  | 2                                    | 3     | 66.7 | 446                                     | 11707 | 3.8  |
| Post-op Pneumonia                    | 30                                   | 219   | 13.70 | 124                                     | 9225  | 1.3  | 29                                   | 212   | 13.7 | 123                                     | 9920  | 1.2  | 20                                   | 177   | 11.3 | 103                                     | 8502  | 1.2  | 7                                    | 82    | 8.5  | 70                                      | 4860  | 1.4  | 8                                    | 100   | 8.0  | 56                                      | 5598  | 1.0  | 0                                    | 46    | 0.0  | 30                                      | 2895  | 1.0  |
| VAP                                  | 18                                   | 81    | 22.22 | 170                                     | 617   | 27.6 | 18                                   | 77    | 23.4 | 170                                     | 559   | 30.4 | 13                                   | 60    | 21.7 | 128                                     | 526   | 24.3 | 9                                    | 40    | 22.5 | 80                                      | 317   | 25.2 | 8                                    | 46    | 17.4 | 93                                      | 370   | 25.1 | 2                                    | 23    | 8.7  | 62                                      | 204   | 30.4 |
| <b>Post-Procedure Adverse Events</b> |                                      |       |       |                                         |       |      |                                      |       |      |                                         |       |      |                                      |       |      |                                         |       |      |                                      |       |      |                                         |       |      |                                      |       |      |                                         |       |      |                                      |       |      |                                         |       |      |
| FAPCAP                               | 2                                    | 90    | 2.22  | 135                                     | 4169  | 3.2  | 5                                    | 71    | 7.0  | 117                                     | 3669  | 3.2  | 5                                    | 64    | 7.8  | 89                                      | 2523  | 3.5  | 2                                    | 36    | 5.6  | 69                                      | 2019  | 3.4  | 4                                    | 47    | 8.5  | 87                                      | 2195  | 4.0  | 3                                    | 45    | 6.7  | 62                                      | 1720  | 3.6  |
| AE with Hip Rep.                     | 5                                    | 113   | 4.42  | 10                                      | 1328  | 0.8  | 3                                    | 123   | 2.4  | 7                                       | 1481  | 0.5  | 3                                    | 92    | 3.3  | 8                                       | 1322  | 0.6  | 2                                    | 44    | 4.5  | 7                                       | 862   | 0.8  | 1                                    | 47    | 2.1  | 4                                       | 989   | 0.4  | 0                                    | 25    | 0.0  | 2                                       | 589   | 0.3  |
| AE with Knee Rep.                    | 1                                    | 105   | 0.95  | 0                                       | 2028  | 0.0  | 3                                    | 121   | 2.5  | 4                                       | 2424  | 0.2  | 0                                    | 78    | 0.0  | 1                                       | 2067  | 0.0  | 0                                    | 28    | 0.0  | 2                                       | 1219  | 0.2  | 1                                    | 40    | 2.5  | 0                                       | 1480  | 0.0  | 0                                    | 20    | 0.0  | 0                                       | 949   | 0.0  |
| Contrast Nephrop.                    | 46                                   | 514   | 8.95  | 74                                      | 3745  | 2.0  | 33                                   | 470   | 7.0  | 78                                      | 3402  | 2.3  | 37                                   | 324   | 11.4 | 47                                      | 2478  | 1.9  | 27                                   | 276   | 9.8  | 40                                      | 2080  | 1.9  | 33                                   | 317   | 10.4 | 58                                      | 2329  | 2.5  | 20                                   | 223   | 9.0  | 37                                      | 1983  | 1.9  |
| Mech Comp. w/CL                      | 18                                   | 155   | 11.61 | 627                                     | 4577  | 13.7 | 31                                   | 173   | 17.9 | 639                                     | 4195  | 15.2 | 23                                   | 132   | 17.4 | 545                                     | 3675  | 14.8 | 9                                    | 78    | 11.5 | 335                                     | 2339  | 14.3 | 8                                    | 92    | 8.7  | 372                                     | 2707  | 13.7 | 3                                    | 35    | 8.6  | 203                                     | 1378  | 14.7 |
| Post-op Cardiac AE                   | 53                                   | 94    | 56.38 | 127                                     | 9550  | 1.3  | 56                                   | 98    | 57.1 | 128                                     | 10273 | 1.2  | 46                                   | 95    | 48.4 | 111                                     | 8828  | 1.3  | 22                                   | 42    | 52.4 | 65                                      | 5002  | 1.3  | 27                                   | 45    | 60.0 | 51                                      | 5748  | 0.9  | 11                                   | 25    | 44.0 | 24                                      | 2953  | 0.8  |
| Post-op VTE                          | 3                                    | 40    | 7.50  | 177                                     | 9604  | 1.8  | 7                                    | 37    | 18.9 | 177                                     | 10334 | 1.7  | 2                                    | 42    | 4.8  | 155                                     | 8883  | 1.7  | 0                                    | 25    | 0.0  | 87                                      | 5019  | 1.7  | 0                                    | 26    | 0.0  | 78                                      | 5768  | 1.4  | 0                                    | 6     | 0.0  | 35                                      | 2972  | 1.2  |

<sup>41</sup> Note: Patients “without this AE” are those who were exposed to the AE type but did not experience it; those “with this AE” experienced the AE. All patients are exposed to the MPSMS Fall and HAPU measures, for all other measures less than 100 percent of patients are exposed to the AE measure.

### Four Conditions, 2016-2019:

| MPSMS Adverse Event Type             | 2016 Deaths in patients with this AE |       |       | 2016 Deaths in patients without this AE |       |      | 2017 Deaths in patients with this AE |       |      | 2017 Deaths in patients without this AE |       |      | 2018 Deaths in patients with this AE |       |       | 2018 Deaths in patients without this AE |       |      | 2019 Deaths in patients with this AE |       |      | 2019 Deaths in patients without this AE |       |      | Combined 2010-2019 Deaths in patients with this AE |       |      | Combined 2010-2019 Deaths in patients without this AE |        |      |    |       |
|--------------------------------------|--------------------------------------|-------|-------|-----------------------------------------|-------|------|--------------------------------------|-------|------|-----------------------------------------|-------|------|--------------------------------------|-------|-------|-----------------------------------------|-------|------|--------------------------------------|-------|------|-----------------------------------------|-------|------|----------------------------------------------------|-------|------|-------------------------------------------------------|--------|------|----|-------|
|                                      | HM                                   | Total | Rate  | HM                                      | Total | Rate | HM                                   | Total | Rate | HM                                      | Total | Rate | HM                                   | Total | Rate  | HM                                      | Total | Rate | HM                                   | Total | Rate | HM                                      | Total | Rate | HM                                                 | Total | Rate | HM                                                    | Total  | Rate | HM | Total |
| <b>Adverse Drug Events</b>           |                                      |       |       |                                         |       |      |                                      |       |      |                                         |       |      |                                      |       |       |                                         |       |      |                                      |       |      |                                         |       |      |                                                    |       |      |                                                       |        |      |    |       |
| Digixon AE                           | 1                                    | 1     | 100.0 | 32                                      | 534   | 6.0  | N/A                                  | 0     | N/A  | 17                                      | 362   | 4.7  | 1                                    | 1     | 100.0 | 10                                      | 146   | 6.9  | N/A                                  | 0     | N/A  | 1                                       | 52    | 1.9  | 19                                                 | 42    | 45.2 | 487                                                   | 6736   | 7.2  |    |       |
| Hypoglycemic AE                      | 34                                   | 439   | 7.7   | 240                                     | 6295  | 3.8  | 32                                   | 326   | 9.8  | 202                                     | 4402  | 4.6  | 16                                   | 184   | 8.7   | 99                                      | 2173  | 4.6  | 6                                    | 74    | 8.1  | 45                                      | 1172  | 3.8  | 540                                                | 5719  | 9.4  | 3037                                                  | 59904  | 5.1  |    |       |
| IV Heparin AE                        | 25                                   | 120   | 20.8  | 94                                      | 1550  | 6.1  | 17                                   | 80    | 21.3 | 72                                      | 1231  | 5.8  | 8                                    | 53    | 15.1  | 43                                      | 798   | 5.4  | 2                                    | 22    | 9.1  | 14                                      | 413   | 3.4  | 312                                                | 1750  | 17.8 | 875                                                   | 16133  | 5.4  |    |       |
| LMWH, etc., AE                       | 23                                   | 162   | 14.2  | 173                                     | 7227  | 2.4  | 9                                    | 85    | 10.6 | 121                                     | 4860  | 2.5  | 7                                    | 42    | 16.7  | 60                                      | 2268  | 2.7  | 3                                    | 36    | 8.3  | 22                                      | 1209  | 1.8  | 350                                                | 2748  | 12.7 | 2172                                                  | 70504  | 3.1  |    |       |
| Warfarin AEs                         | 12                                   | 69    | 17.4  | 29                                      | 1950  | 1.5  | 8                                    | 48    | 16.7 | 32                                      | 1250  | 2.6  | 3                                    | 19    | 15.8  | 13                                      | 509   | 2.6  | 1                                    | 19    | 5.3  | 1                                       | 228   | 0.4  | 180                                                | 1260  | 14.3 | 439                                                   | 23210  | 1.9  |    |       |
| <b>General Adverse Events</b>        |                                      |       |       |                                         |       |      |                                      |       |      |                                         |       |      |                                      |       |       |                                         |       |      |                                      |       |      |                                         |       |      |                                                    |       |      |                                                       |        |      |    |       |
| HAPU                                 | 69                                   | 699   | 9.9   | 666                                     | 20085 | 3.3  | 59                                   | 470   | 12.6 | 492                                     | 13844 | 3.6  | 25                                   | 285   | 8.8   | 233                                     | 6772  | 3.4  | 14                                   | 129   | 10.9 | 97                                      | 3931  | 2.5  | 1001                                               | 8000  | 12.5 | 7038                                                  | 182286 | 3.9  |    |       |
| Inpatient Falls                      | 7                                    | 156   | 4.5   | 728                                     | 20628 | 3.5  | 5                                    | 114   | 4.4  | 546                                     | 14200 | 3.8  | 4                                    | 63    | 6.4   | 254                                     | 6994  | 3.6  | 0                                    | 25    | 0.0  | 111                                     | 4035  | 2.8  | 109                                                | 1642  | 6.6  | 7930                                                  | 188644 | 4.2  |    |       |
| <b>Hospital-Acquired Infections</b>  |                                      |       |       |                                         |       |      |                                      |       |      |                                         |       |      |                                      |       |       |                                         |       |      |                                      |       |      |                                         |       |      |                                                    |       |      |                                                       |        |      |    |       |
| C diff                               | 7                                    | 67    | 10.4  | 563                                     | 14888 | 3.8  | 5                                    | 42    | 11.9 | 440                                     | 10162 | 4.3  | 1                                    | 21    | 4.8   | 214                                     | 4862  | 4.4  | 2                                    | 8     | 25.0 | 95                                      | 3156  | 3.0  | 97                                                 | 668   | 14.5 | 6457                                                  | 139466 | 4.6  |    |       |
| CLABSI                               | 1                                    | 3     | 33.3  | 103                                     | 1075  | 9.6  | 2                                    | 6     | 33.3 | 88                                      | 760   | 11.6 | 2                                    | 3     | 66.7  | 53                                      | 432   | 12.3 | 1                                    | 2     | 50.0 | 19                                      | 303   | 6.3  | 37                                                 | 111   | 33.3 | 1246                                                  | 12754  | 9.8  |    |       |
| CAUTI                                | 12                                   | 162   | 7.4   | 385                                     | 7172  | 5.4  | 6                                    | 105   | 5.7  | 315                                     | 4687  | 6.7  | 5                                    | 51    | 9.8   | 148                                     | 2303  | 6.4  | 2                                    | 24    | 8.3  | 59                                      | 1560  | 3.8  | 186                                                | 2263  | 8.2  | 4572                                                  | 76728  | 6.0  |    |       |
| MRSA                                 | 1                                    | 8     | 12.5  | 702                                     | 20377 | 3.4  | 2                                    | 8     | 25.0 | 520                                     | 14023 | 3.7  | 0                                    | 3     | 0.0   | 248                                     | 6948  | 3.6  | 0                                    | 1     | 0.0  | 108                                     | 4001  | 2.7  | 22                                                 | 95    | 23.2 | 7498                                                  | 185488 | 4.0  |    |       |
| VRE                                  | 0                                    | 1     | 0.0   | 731                                     | 20720 | 3.5  | 1                                    | 3     | 33.3 | 544                                     | 14259 | 3.8  | N/A                                  | 0     | N/A   | 257                                     | 7028  | 3.7  | N/A                                  | 0     | N/A  | 111                                     | 4052  | 2.7  | 27                                                 | 58    | 46.6 | 7915                                                  | 189452 | 4.2  |    |       |
| Post-op Pneumonia                    | 5                                    | 71    | 7.0   | 47                                      | 5944  | 0.8  | 7                                    | 44    | 15.9 | 43                                      | 3893  | 1.1  | 3                                    | 30    | 10.0  | 25                                      | 1944  | 1.3  | 4                                    | 23    | 17.4 | 14                                      | 1850  | 0.8  | 113                                                | 1004  | 11.3 | 635                                                   | 54631  | 1.2  |    |       |
| VAP                                  | 4                                    | 30    | 13.3  | 79                                      | 290   | 27.2 | 4                                    | 24    | 16.7 | 55                                      | 227   | 24.2 | 5                                    | 15    | 33.3  | 33                                      | 124   | 26.6 | 1                                    | 11    | 9.1  | 15                                      | 70    | 21.4 | 82                                                 | 407   | 20.2 | 885                                                   | 3304   | 26.8 |    |       |
| <b>Post-Procedure Adverse Events</b> |                                      |       |       |                                         |       |      |                                      |       |      |                                         |       |      |                                      |       |       |                                         |       |      |                                      |       |      |                                         |       |      |                                                    |       |      |                                                       |        |      |    |       |
| FAPCAP                               | 3                                    | 54    | 5.6   | 63                                      | 1763  | 3.6  | 3                                    | 19    | 15.8 | 43                                      | 1146  | 3.8  | 0                                    | 31    | 0.0   | 34                                      | 738   | 4.6  | 0                                    | 9     | 0.0  | 17                                      | 269   | 6.3  | 27                                                 | 466   | 5.8  | 716                                                   | 20211  | 3.5  |    |       |
| AE with Hip Rep.                     | 2                                    | 64    | 3.1   | 4                                       | 1247  | 0.3  | 3                                    | 34    | 8.8  | 3                                       | 805   | 0.4  | 2                                    | 22    | 9.1   | 1                                       | 431   | 0.2  | 0                                    | 14    | 0.0  | 2                                       | 506   | 0.4  | 21                                                 | 578   | 3.6  | 48                                                    | 9560   | 0.5  |    |       |
| AE with Knee Rep.                    | 3                                    | 44    | 6.8   | 3                                       | 2115  | 0.1  | 1                                    | 33    | 3.0  | 1                                       | 1306  | 0.1  | 0                                    | 13    | 0.0   | 0                                       | 597   | 0.0  | 0                                    | 15    | 0.0  | 0                                       | 453   | 0.0  | 9                                                  | 497   | 1.8  | 11                                                    | 14638  | 0.1  |    |       |
| Contrast Nephrop.                    | 15                                   | 209   | 7.2   | 40                                      | 2169  | 1.8  | 15                                   | 159   | 9.4  | 34                                      | 1592  | 2.1  | 9                                    | 127   | 7.1   | 23                                      | 982   | 2.3  | 3                                    | 53    | 5.7  | 11                                      | 407   | 2.7  | 238                                                | 2672  | 8.9  | 442                                                   | 21167  | 2.1  |    |       |
| Mech Comp. w/CL                      | 11                                   | 70    | 15.7  | 302                                     | 2270  | 13.3 | 8                                    | 41    | 19.5 | 240                                     | 1650  | 14.5 | 4                                    | 35    | 11.4  | 134                                     | 848   | 15.8 | 0                                    | 13    | 0.0  | 63                                      | 547   | 11.5 | 115                                                | 824   | 14.0 | 3460                                                  | 24186  | 14.3 |    |       |
| Post-op Cardiac AE                   | 14                                   | 27    | 51.9  | 44                                      | 6048  | 0.7  | 19                                   | 37    | 51.4 | 36                                      | 3954  | 0.9  | 14                                   | 25    | 56.0  | 15                                      | 1976  | 0.8  | 8                                    | 20    | 40.0 | 11                                      | 1870  | 0.6  | 270                                                | 508   | 53.2 | 612                                                   | 56202  | 1.1  |    |       |
| Post-op VTE                          | 1                                    | 24    | 4.2   | 57                                      | 6051  | 0.9  | 1                                    | 16    | 6.3  | 54                                      | 3975  | 1.4  | 0                                    | 5     | 0.0   | 29                                      | 1996  | 1.5  | 1                                    | 15    | 6.7  | 18                                      | 1875  | 1.0  | 16                                                 | 244   | 6.6  | 866                                                   | 56469  | 1.5  |    |       |

## All-Other Conditions, 2012-2016:

| MPSMS Adverse Event Type             | 2012 Deaths in patients with this AE |       |      | 2012 Deaths in patients without this AE |       |      | 2013 Deaths in patients with this AE |       |      | 2013 Deaths in patients without this AE |       |      | 2014 Deaths in patients with this AE |       |      | 2014 Deaths in patients without this AE |       |      | 2015 Deaths in patients with this AE |       |      | 2015 Deaths in patients without this AE |       |      | 2016 Deaths in patients with this AE |       |       | 2016 Deaths in patients without this AE |       |      |
|--------------------------------------|--------------------------------------|-------|------|-----------------------------------------|-------|------|--------------------------------------|-------|------|-----------------------------------------|-------|------|--------------------------------------|-------|------|-----------------------------------------|-------|------|--------------------------------------|-------|------|-----------------------------------------|-------|------|--------------------------------------|-------|-------|-----------------------------------------|-------|------|
|                                      | HM                                   | Total | Rate | HM                                      | Total | Rate | HM                                   | Total | Rate | HM                                      | Total | Rate | HM                                   | Total | Rate | HM                                      | Total | Rate | HM                                   | Total | Rate | HM                                      | Total | Rate | HM                                   | Total | Rate  | HM                                      | Total | Rate |
| <b>Adverse Drug Events</b>           |                                      |       |      |                                         |       |      |                                      |       |      |                                         |       |      |                                      |       |      |                                         |       |      |                                      |       |      |                                         |       |      |                                      |       |       |                                         |       |      |
| Digixon AE                           | 0                                    | 1     | 0.0  | 4                                       | 137   | 2.9  | N/A                                  | 0     | N/A  | 6                                       | 65    | 9.2  | 0                                    | 1     | 0.0  | 2                                       | 43    | 4.7  | N/A                                  | 0     | N/A  | 3                                       | 71    | 4.2  | N/A                                  | 0     | N/A   | 3                                       | 71    | 4.2  |
| Hypoglycemic AE                      | 4                                    | 164   | 2.4  | 30                                      | 2036  | 1.5  | 2                                    | 89    | 2.2  | 18                                      | 1090  | 1.7  | 1                                    | 67    | 1.5  | 19                                      | 874   | 2.2  | 7                                    | 112   | 6.3  | 28                                      | 1358  | 2.1  | 4                                    | 116   | 3.4   | 53                                      | 1554  | 3.4  |
| IV Heparin AE                        | 3                                    | 22    | 13.6 | 4                                       | 185   | 2.2  | 3                                    | 11    | 27.3 | 4                                       | 100   | 4.0  | 2                                    | 15    | 13.3 | 3                                       | 101   | 3.0  | 1                                    | 12    | 8.3  | 4                                       | 109   | 3.7  | 5                                    | 15    | 33.3  | 6                                       | 132   | 4.5  |
| LMWH, etc., AE                       | 1                                    | 39    | 2.6  | 31                                      | 1917  | 1.6  | 3                                    | 21    | 14.3 | 16                                      | 1224  | 1.3  | 3                                    | 20    | 15.0 | 10                                      | 1012  | 1.0  | 0                                    | 17    | 0.0  | 23                                      | 1509  | 1.5  | 6                                    | 29    | 20.7  | 29                                      | 1801  | 1.6  |
| Warfarin AEs                         | 1                                    | 27    | 3.7  | 6                                       | 633   | 0.9  | 5                                    | 16    | 31.3 | 5                                       | 352   | 1.4  | 0                                    | 8     | 0.0  | 2                                       | 235   | 0.9  | 3                                    | 17    | 17.6 | 4                                       | 320   | 1.3  | 4                                    | 17    | 23.5  | 2                                       | 306   | 0.7  |
| <b>General Adverse Events</b>        |                                      |       |      |                                         |       |      |                                      |       |      |                                         |       |      |                                      |       |      |                                         |       |      |                                      |       |      |                                         |       |      |                                      |       |       |                                         |       |      |
| HAPU                                 | 12                                   | 222   | 5.4  | 99                                      | 9310  | 1.1  | 13                                   | 120   | 10.8 | 55                                      | 5166  | 1.1  | 7                                    | 78    | 9.0  | 55                                      | 4230  | 1.3  | 10                                   | 123   | 8.1  | 87                                      | 5949  | 1.5  | 17                                   | 151   | 11.3  | 143                                     | 6963  | 2.1  |
| Inpatient Falls                      | 1                                    | 84    | 1.2  | 110                                     | 9448  | 1.2  | 0                                    | 38    | 0.0  | 68                                      | 5248  | 1.3  | 3                                    | 34    | 8.8  | 59                                      | 4274  | 1.4  | 4                                    | 50    | 8.0  | 93                                      | 6022  | 1.5  | 2                                    | 53    | 3.8   | 158                                     | 7061  | 2.2  |
| <b>Hospital-Acquired Infections</b>  |                                      |       |      |                                         |       |      |                                      |       |      |                                         |       |      |                                      |       |      |                                         |       |      |                                      |       |      |                                         |       |      |                                      |       |       |                                         |       |      |
| C diff                               | 1                                    | 11    | 9.1  | 77                                      | 6108  | 1.3  | 0                                    | 8     | 0.0  | 40                                      | 3403  | 1.2  | 0                                    | 11    | 0.0  | 42                                      | 2634  | 1.6  | 3                                    | 14    | 21.4 | 67                                      | 3788  | 1.8  | 1                                    | 14    | 7.1   | 118                                     | 4419  | 2.7  |
| CLABSI                               | 1                                    | 2     | 50.0 | 19                                      | 277   | 6.9  | N/A                                  | 0     | N/A  | 14                                      | 156   | 9.0  | 0                                    | 1     | 0.0  | 5                                       | 115   | 4.3  | N/A                                  | 0     | N/A  | 15                                      | 169   | 8.9  | 0                                    | 2     | 0.0   | 21                                      | 210   | 10.0 |
| CAUTI                                | 1                                    | 54    | 1.9  | 65                                      | 2659  | 2.4  | 2                                    | 35    | 5.7  | 35                                      | 1427  | 2.5  | 0                                    | 15    | 0.0  | 30                                      | 1105  | 2.7  | 1                                    | 29    | 3.4  | 42                                      | 1438  | 2.9  | 1                                    | 32    | 3.1   | 82                                      | 1689  | 4.9  |
| MRSA                                 | 0                                    | 2     | 0.0  | 105                                     | 9308  | 1.1  | N/A                                  | 0     | N/A  | 68                                      | 5172  | 1.3  | 0                                    | 3     | 0.0  | 60                                      | 4233  | 1.4  | 0                                    | 1     | 0.0  | 94                                      | 5943  | 1.6  | N/A                                  | 0     | N/A   | 152                                     | 6962  | 2.2  |
| VRE                                  | 0                                    | 1     | 0.0  | 109                                     | 9484  | 1.1  | 0                                    | 3     | 0.0  | 67                                      | 5270  | 1.3  | 1                                    | 2     | 50.0 | 60                                      | 4290  | 1.4  | N/A                                  | 0     | N/A  | 96                                      | 6040  | 1.6  | 1                                    | 1     | 100.0 | 158                                     | 7091  | 2.2  |
| VAP                                  | 1                                    | 5     | 20.0 | 7                                       | 54    | 13.0 | 1                                    | 2     | 50.0 | 4                                       | 25    | 16.0 | 0                                    | 3     | 0.0  | 8                                       | 26    | 30.8 | 1                                    | 4     | 25.0 | 14                                      | 60    | 23.3 | 0                                    | 4     | 0.0   | 23                                      | 63    | 36.5 |
| <b>Post-Procedure Adverse Events</b> |                                      |       |      |                                         |       |      |                                      |       |      |                                         |       |      |                                      |       |      |                                         |       |      |                                      |       |      |                                         |       |      |                                      |       |       |                                         |       |      |
| FAPCAP                               | 0                                    | 3     | 0.0  | 3                                       | 139   | 2.2  | 0                                    | 1     | 0.0  | 0                                       | 85    | 0.0  | 0                                    | 3     | 0.0  | 1                                       | 74    | 1.4  | 0                                    | 2     | 0.0  | 4                                       | 120   | 3.3  | N/A                                  | 0     | N/A   | 2                                       | 127   | 1.6  |
| Contrast Nephrop.                    | 3                                    | 14    | 21.4 | 1                                       | 146   | 0.7  | 0                                    | 7     | 0.0  | 0                                       | 93    | 0.0  | 1                                    | 9     | 11.1 | 0                                       | 88    | 0.0  | 1                                    | 10    | 10.0 | 1                                       | 124   | 0.8  | 0                                    | 8     | 0.0   | 1                                       | 145   | 0.7  |
| Mech Comp. w/CL                      | 0                                    | 16    | 0.0  | 33                                      | 533   | 6.2  | 0                                    | 10    | 0.0  | 21                                      | 308   | 6.8  | 0                                    | 5     | 0.0  | 13                                      | 235   | 5.5  | 2                                    | 11    | 18.2 | 40                                      | 407   | 9.8  | 0                                    | 12    | 0.0   | 48                                      | 488   | 9.8  |

**All-Other Conditions, 2017-2019:**

| MPSMS Adverse Event Type | 2017 Deaths in patients with this AE |       |      | 2017 Deaths in patients without this AE |       |      | 2018 Deaths in patients with this AE |       |      | 2018 Deaths in patients without this AE |       |      | 2019 Deaths in patients with this AE |       |      | 2019 Deaths in patients without this AE |       |      | Combined 2012-2019 Deaths in patients with this AE |       |      | Combined 2012-2019 Deaths in patients without this AE |       |      |
|--------------------------|--------------------------------------|-------|------|-----------------------------------------|-------|------|--------------------------------------|-------|------|-----------------------------------------|-------|------|--------------------------------------|-------|------|-----------------------------------------|-------|------|----------------------------------------------------|-------|------|-------------------------------------------------------|-------|------|
|                          | HM                                   | Total | Rate | HM                                      | Total | Rate | HM                                   | Total | Rate | HM                                      | Total | Rate | HM                                   | Total | Rate | HM                                      | Total | Rate | HM                                                 | Total | Rate | HM                                                    | Total | Rate |
|                          | <b>Adverse Drug Events</b>           |       |      |                                         |       |      |                                      |       |      |                                         |       |      |                                      |       |      |                                         |       |      |                                                    |       |      |                                                       |       |      |
| <b>Digixon AE</b>        | 0                                    | 1     | 0.0  | 1                                       | 73    | 1.4  | N/A                                  | 0     | N/A  | 4                                       | 78    | 5.1  | N/A                                  | 0     | N/A  | 1                                       | 38    | 2.6  | 0                                                  | 3     | 0.0  | 24                                                    | 576   | 4.2  |
| <b>Hypoglycemic AE</b>   | 12                                   | 117   | 10.3 | 46                                      | 1803  | 2.6  | 6                                    | 161   | 3.7  | 47                                      | 1789  | 2.6  | 5                                    | 59    | 8.5  | 27                                      | 1142  | 2.4  | 41                                                 | 885   | 4.6  | 268                                                   | 11646 | 2.3  |
| <b>IV Heparin AE</b>     | 1                                    | 11    | 9.1  | 13                                      | 186   | 7.0  | 3                                    | 12    | 25.0 | 11                                      | 216   | 5.1  | 0                                    | 7     | 0.0  | 4                                       | 120   | 3.3  | 18                                                 | 105   | 17.1 | 49                                                    | 1149  | 4.3  |
| <b>LMWH, etc., AE</b>    | 4                                    | 31    | 12.9 | 30                                      | 1991  | 1.5  | 2                                    | 27    | 7.4  | 31                                      | 2049  | 1.5  | 0                                    | 15    | 0.0  | 10                                      | 1240  | 0.8  | 19                                                 | 199   | 9.6  | 180                                                   | 12742 | 1.4  |
| <b>Warfarin AEs</b>      | 1                                    | 11    | 9.1  | 8                                       | 330   | 2.4  | 2                                    | 16    | 12.5 | 5                                       | 268   | 1.9  | 0                                    | 6     | 0.0  | 2                                       | 145   | 1.4  | 16                                                 | 118   | 13.6 | 34                                                    | 2589  | 1.3  |
|                          | <b>General Adverse Events</b>        |       |      |                                         |       |      |                                      |       |      |                                         |       |      |                                      |       |      |                                         |       |      |                                                    |       |      |                                                       |       |      |
| <b>HAPU</b>              | 19                                   | 170   | 11.2 | 149                                     | 7742  | 1.9  | 18                                   | 211   | 8.5  | 143                                     | 7684  | 1.9  | 7                                    | 142   | 4.9  | 70                                      | 4662  | 1.5  | 103                                                | 1,217 | 8.5  | 801                                                   | 51704 | 1.6  |
| <b>Inpatient Falls</b>   | 2                                    | 61    | 3.3  | 166                                     | 7851  | 2.1  | 6                                    | 75    | 8.0  | 155                                     | 7820  | 2.0  | 2                                    | 46    | 4.4  | 75                                      | 4758  | 1.6  | 20                                                 | 441   | 4.5  | 884                                                   | 52480 | 1.7  |
|                          | <b>Hospital-Acquired Infections</b>  |       |      |                                         |       |      |                                      |       |      |                                         |       |      |                                      |       |      |                                         |       |      |                                                    |       |      |                                                       |       |      |
| <b>C diff</b>            | 2                                    | 11    | 18.2 | 112                                     | 4985  | 2.2  | 4                                    | 12    | 33.3 | 113                                     | 4944  | 2.3  | 0                                    | 5     | 0.0  | 54                                      | 3073  | 1.8  | 11                                                 | 86    | 12.8 | 623                                                   | 33352 | 1.9  |
| <b>CLABSI</b>            | 0                                    | 1     | 0.0  | 36                                      | 234   | 15.4 | N/A                                  | 0     | N/A  | 17                                      | 248   | 6.9  | 0                                    | 1     | 0.0  | 14                                      | 155   | 9.0  | 1                                                  | 7     | 14.3 | 141                                                   | 1564  | 9.0  |
| <b>CAUTI</b>             | 2                                    | 33    | 6.1  | 84                                      | 1763  | 4.8  | 3                                    | 33    | 9.1  | 81                                      | 1799  | 4.5  | 0                                    | 19    | 0.0  | 50                                      | 1114  | 4.5  | 10                                                 | 250   | 4.0  | 469                                                   | 12993 | 3.6  |
| <b>MRSA</b>              | 0                                    | 4     | 0.0  | 158                                     | 7744  | 2.0  | N/A                                  | 0     | N/A  | 159                                     | 7743  | 2.1  | N/A                                  | 0     | N/A  | 73                                      | 4718  | 1.6  | 0                                                  | 10    | 0.0  | 869                                                   | 51822 | 1.7  |
| <b>VRE</b>               | N/A                                  | 0     | N/A  | 166                                     | 7876  | 2.1  | 2                                    | 3     | 66.7 | 159                                     | 7869  | 2.0  | N/A                                  | 0     | N/A  | 77                                      | 4794  | 1.6  | 4                                                  | 10    | 40.0 | 892                                                   | 52712 | 1.7  |
| <b>VAP</b>               | 2                                    | 6     | 33.3 | 23                                      | 76    | 30.3 | 1                                    | 8     | 12.5 | 19                                      | 80    | 23.8 | 1                                    | 9     | 11.1 | 11                                      | 52    | 21.2 | 7                                                  | 41    | 17.1 | 109                                                   | 436   | 25.0 |
|                          | <b>Post-Procedure Adverse Events</b> |       |      |                                         |       |      |                                      |       |      |                                         |       |      |                                      |       |      |                                         |       |      |                                                    |       |      |                                                       |       |      |
| <b>FAPCAP</b>            | 0                                    | 3     | 0.0  | 1                                       | 142   | 0.7  | 0                                    | 6     | 0.0  | 7                                       | 158   | 4.4  | 0                                    | 4     | 0.0  | 2                                       | 74    | 2.7  | 0                                                  | 22    | 0.0  | 20                                                    | 919   | 2.2  |
| <b>Contrast Nephrop.</b> | 0                                    | 14    | 0.0  | 1                                       | 163   | 0.6  | 4                                    | 22    | 18.2 | 4                                       | 191   | 2.1  | 2                                    | 9     | 22.2 | 1                                       | 104   | 1.0  | 11                                                 | 93    | 11.8 | 9                                                     | 1054  | 0.9  |
| <b>Mech Comp. w/CL</b>   | 1                                    | 14    | 7.1  | 73                                      | 599   | 12.2 | 4                                    | 19    | 21.1 | 61                                      | 642   | 9.5  | 2                                    | 13    | 15.4 | 35                                      | 391   | 9.0  | 9                                                  | 100   | 9.0  | 324                                                   | 3603  | 9.0  |

**Four Conditions and All-Other Conditions, 2010-2019 (2012-2019 for All-Other Conditions):**

| <b>Overall Hospital Mortality Rates With and Without Adverse Events</b> |                             |       |       |                   |        |      |
|-------------------------------------------------------------------------|-----------------------------|-------|-------|-------------------|--------|------|
| <b>Year</b>                                                             | <b>With AE</b>              |       |       | <b>Without AE</b> |        |      |
|                                                                         | HM                          | Total | Rate  | HM                | Total  | Rate |
|                                                                         | <b>Four Conditions</b>      |       |       |                   |        |      |
| <b>2010</b>                                                             | 514                         | 4934  | 10.42 | 1038              | 28744  | 3.61 |
| <b>2011</b>                                                             | 522                         | 4884  | 10.69 | 1018              | 29083  | 3.5  |
| <b>2012</b>                                                             | 389                         | 3698  | 10.52 | 857               | 23558  | 3.64 |
| <b>2013</b>                                                             | 233                         | 2234  | 10.43 | 535               | 15718  | 3.4  |
| <b>2014</b>                                                             | 242                         | 2442  | 9.91  | 584               | 17033  | 3.43 |
| <b>2015</b>                                                             | 119                         | 1314  | 9.06  | 333               | 10429  | 3.19 |
| <b>2016</b>                                                             | 178                         | 1980  | 8.99  | 557               | 18804  | 2.96 |
| <b>2017</b>                                                             | 145                         | 1369  | 10.59 | 406               | 12945  | 3.14 |
| <b>2018</b>                                                             | 79                          | 825   | 9.58  | 179               | 6232   | 2.87 |
| <b>2019</b>                                                             | 37                          | 413   | 8.96  | 74                | 3647   | 2.03 |
| <b>2010-2019</b>                                                        | 2459                        | 24098 | 10.2  | 5580              | 166188 | 3.36 |
|                                                                         | <b>All-Other Conditions</b> |       |       |                   |        |      |
| <b>2012</b>                                                             | 26                          | 588   | 4.42  | 85                | 8944   | 0.95 |
| <b>2013</b>                                                             | 20                          | 312   | 6.41  | 48                | 4974   | 0.97 |
| <b>2014</b>                                                             | 16                          | 237   | 6.75  | 46                | 4071   | 1.13 |
| <b>2015</b>                                                             | 22                          | 349   | 6.3   | 75                | 5723   | 1.31 |
| <b>2016</b>                                                             | 33                          | 398   | 8.29  | 127               | 6716   | 1.89 |
| <b>2017</b>                                                             | 37                          | 435   | 8.51  | 131               | 7477   | 1.75 |
| <b>2018</b>                                                             | 42                          | 524   | 8.02  | 119               | 7371   | 1.61 |
| <b>2019</b>                                                             | 13                          | 295   | 4.41  | 64                | 4509   | 1.42 |
| <b>2012-2019</b>                                                        | 209                         | 3138  | 6.66  | 695               | 49783  | 1.40 |



**eTable 18.** Observed Length of Stay (LOS) Data for Patients Experiencing and not Experiencing each of the 21 MPSMS Adverse Events <sup>42</sup>

**Four Conditions, 2010-2015:**

| MPSMS Adverse Event Type             | 2010 LOS of patients with this AE |       | 2010 LOS of patients without this AE |       | 2011 LOS of patients with this AE |       | 2011 LOS of patients without this AE |       | 2012 LOS of patients with this AE |       | 2012 LOS of patients without this AE |       | 2013 LOS of patients with this AE |       | 2013 LOS of patients without this AE |       | 2014 LOS of patients with this AE |       | 2014 LOS of patients without this AE |       | 2015 LOS of patients with this AE |       | 2015 LOS of patients without this AE |       |
|--------------------------------------|-----------------------------------|-------|--------------------------------------|-------|-----------------------------------|-------|--------------------------------------|-------|-----------------------------------|-------|--------------------------------------|-------|-----------------------------------|-------|--------------------------------------|-------|-----------------------------------|-------|--------------------------------------|-------|-----------------------------------|-------|--------------------------------------|-------|
|                                      | Mean (SD)                         | Total | Mean (SD)                            | Total | Mean (SD)                         | Total | Mean (SD)                            | Total | Mean (SD)                         | Total | Mean (SD)                            | Total | Mean (SD)                         | Total | Mean (SD)                            | Total | Mean (SD)                         | Total | Mean (SD)                            | Total | Mean (SD)                         | Total | Mean (SD)                            | Total |
| <b>Adverse Drug Events</b>           |                                   |       |                                      |       |                                   |       |                                      |       |                                   |       |                                      |       |                                   |       |                                      |       |                                   |       |                                      |       |                                   |       |                                      |       |
| Digixon AE                           | 9.9 (6.4)                         | 8     | 7.4 (7.2)                            | 1502  | 8.5 (4.9)                         | 4     | 7.4 (8.4)                            | 1274  | 10.0 (4.7)                        | 5     | 7.8 (7.6)                            | 958   | 12.0 (5.3)                        | 3     | 7.3 (8.9)                            | 623   | 11.0 (1.4)                        | 2     | 7.4 (6.9)                            | 590   | 15.0                              | 1     | 6.8 (6.3)                            | 268   |
| Hypoglycemic AE                      | 9.9 (9.4)                         | 1111  | 6.3 (6.5)                            | 10279 | 9.2 (8.7)                         | 1098  | 5.9 (6.1)                            | 10083 | 9.9 (8.7)                         | 731   | 6.1 (6.0)                            | 8137  | 10.2 (11.9)                       | 498   | 5.9 (6.1)                            | 5551  | 9.7 (9.7)                         | 541   | 5.9 (5.6)                            | 5902  | 8.6 (8.1)                         | 265   | 5.2 (5.3)                            | 3459  |
| IV Heparin AE                        | 14.3 (11.7)                       | 309   | 5.8 (6.8)                            | 2524  | 13.1 (9.4)                        | 289   | 5.5 (6.2)                            | 2540  | 14.1 (11.9)                       | 204   | 6.1 (7.0)                            | 1890  | 15.8 (15.1)                       | 145   | 5.5 (6.1)                            | 1540  | 12.9 (10.2)                       | 178   | 5.6 (6.5)                            | 1642  | 12.0 (8.0)                        | 90    | 4.5 (5.2)                            | 1353  |
| LMWH, etc., AE                       | 12.8 (9.4)                        | 556   | 5.3 (5.2)                            | 12217 | 12.7 (11.5)                       | 565   | 5.1 (4.9)                            | 12676 | 12.0 (9.6)                        | 446   | 5.3 (4.9)                            | 10002 | 12.6 (10.7)                       | 209   | 5.1 (5.1)                            | 6703  | 11.9 (9.2)                        | 241   | 5.1 (4.9)                            | 7239  | 10.9 (8.3)                        | 98    | 4.6 (4.5)                            | 4307  |
| Warfarin AEs                         | 14.6 (11.5)                       | 262   | 5.5 (5.2)                            | 4870  | 11.7 (10.9)                       | 263   | 5.3 (5.1)                            | 4677  | 12.0 (9.7)                        | 182   | 5.6 (5.1)                            | 3570  | 15.9 (18.1)                       | 101   | 5.7 (5.4)                            | 2353  | 13.8 (13.4)                       | 96    | 5.8 (5.9)                            | 2278  | 13.4 (9.5)                        | 45    | 5.3 (5.1)                            | 1161  |
| <b>General Adverse Events</b>        |                                   |       |                                      |       |                                   |       |                                      |       |                                   |       |                                      |       |                                   |       |                                      |       |                                   |       |                                      |       |                                   |       |                                      |       |
| HAPU                                 | 12.2 (10.8)                       | 1408  | 4.8 (4.6)                            | 30718 | 11.6 (10.6)                       | 1403  | 4.6 (4.3)                            | 31024 | 11.8 (10.2)                       | 1160  | 4.7 (4.4)                            | 24850 | 12.3 (12.0)                       | 603   | 4.6 (4.5)                            | 16581 | 11.8 (10.4)                       | 632   | 4.6 (4.3)                            | 18017 | 10.7 (9.4)                        | 377   | 4.2 (4.1)                            | 10914 |
| Inpatient Falls                      | 9.6 (8.2)                         | 292   | 5.1 (5.2)                            | 31834 | 8.0 (7.0)                         | 289   | 4.9 (4.9)                            | 32138 | 9.7 (10.4)                        | 222   | 5.0 (4.9)                            | 25788 | 8.1 (6.5)                         | 141   | 4.9 (5.1)                            | 17043 | 9.0 (10.8)                        | 171   | 4.8 (4.7)                            | 18478 | 10.2 (11.5)                       | 76    | 4.4 (4.4)                            | 11215 |
| <b>Hospital-Acquired Infections</b>  |                                   |       |                                      |       |                                   |       |                                      |       |                                   |       |                                      |       |                                   |       |                                      |       |                                   |       |                                      |       |                                   |       |                                      |       |
| C diff                               | 18.2 (11.0)                       | 90    | 5.7 (5.7)                            | 23578 | 17.1 (14.0)                       | 110   | 5.4 (5.3)                            | 24463 | 16.3 (13.4)                       | 99    | 5.4 (5.3)                            | 20332 | 14.5 (10.7)                       | 60    | 5.5 (5.6)                            | 12282 | 17.4 (12.7)                       | 61    | 5.4 (5.2)                            | 13296 | 16.0 (14.1)                       | 28    | 5.1 (4.9)                            | 7302  |
| CLABSI                               | 26.5 (17.8)                       | 20    | 11.0 (9.1)                           | 2343  | 28.6 (19.3)                       | 20    | 10.6 (8.3)                           | 1966  | 20.1 (9.0)                        | 18    | 10.7 (8.2)                           | 1730  | 26.8 (9.7)                        | 4     | 10.8 (8.2)                           | 1120  | 21.0 (18.4)                       | 2     | 10.1 (7.6)                           | 1354  | 17.5 (2.1)                        | 2     | 9.8 (7.6)                            | 688   |
| CAUTI                                | 13.2 (13.1)                       | 500   | 5.8 (5.6)                            | 13738 | 12.2 (11.4)                       | 445   | 5.5 (5.3)                            | 14246 | 12.0 (10.7)                       | 327   | 5.6 (5.3)                            | 11502 | 14.4 (14.1)                       | 195   | 5.7 (5.3)                            | 6678  | 13.4 (10.6)                       | 192   | 5.6 (5.4)                            | 7348  | 13.4 (12.8)                       | 101   | 5.5 (5.3)                            | 3829  |
| MRSA                                 | 24.2 (13.8)                       | 18    | 5.0 (5.2)                            | 31256 | 20.3 (11.9)                       | 10    | 4.8 (4.9)                            | 31583 | 21.2 (15.1)                       | 9     | 4.9 (4.8)                            | 25255 | 9.9 (3.9)                         | 8     | 4.8 (5.0)                            | 16784 | 20.7 (10.4)                       | 10    | 4.8 (4.7)                            | 18271 | 9.0                               | 1     | 4.3 (4.4)                            | 11070 |
| VRE                                  | 31.9 (17.7)                       | 10    | 5.1 (5.2)                            | 32003 | 34.3 (19.6)                       | 4     | 4.9 (4.9)                            | 32298 | 29.7 (8.5)                        | 3     | 5.0 (5.0)                            | 25899 | 23.4 (10.9)                       | 5     | 4.9 (5.1)                            | 17099 | 24.6 (21.7)                       | 5     | 4.8 (4.8)                            | 18561 | 53.0                              | 1     | 4.4 (4.5)                            | 11261 |
| Post-op Pneumonia                    | 17.4 (15.3)                       | 189   | 5.3 (5.6)                            | 9101  | 16.2 (12.7)                       | 183   | 4.9 (5.0)                            | 9797  | 14.0 (11.0)                       | 157   | 5.1 (5.1)                            | 8399  | 20.6 (18.2)                       | 75    | 5.1 (5.1)                            | 4790  | 17.1 (13.4)                       | 92    | 4.9 (4.9)                            | 5542  | 15.1 (10.3)                       | 46    | 4.5 (4.8)                            | 2865  |
| VAP                                  | 20.9 (13.9)                       | 63    | 16.2 (11.7)                          | 447   | 20.2 (17.9)                       | 59    | 16.5 (12.7)                          | 389   | 19.0 (11.7)                       | 47    | 16.1 (12.1)                          | 398   | 22.2 (14.9)                       | 31    | 16.2 (11.3)                          | 237   | 18.9 (11.4)                       | 38    | 15.8 (12.2)                          | 277   | 17.9 (10.1)                       | 21    | 14.2 (9.7)                           | 142   |
| <b>Post-Procedure Adverse Events</b> |                                   |       |                                      |       |                                   |       |                                      |       |                                   |       |                                      |       |                                   |       |                                      |       |                                   |       |                                      |       |                                   |       |                                      |       |
| FAPCAP                               | 5.8 (5.4)                         | 88    | 5.5 (5.9)                            | 4034  | 6.3 (4.7)                         | 66    | 5.2 (5.4)                            | 3552  | 5.8 (4.8)                         | 59    | 5.3 (5.7)                            | 2434  | 6.6 (8.4)                         | 34    | 5.3 (5.8)                            | 1950  | 5.5 (4.9)                         | 43    | 5.3 (5.4)                            | 2108  | 4.9 (4.4)                         | 42    | 4.5 (4.3)                            | 1658  |
| AE with Hip Rep                      | 7.1 (5.3)                         | 108   | 4.1 (2.4)                            | 1318  | 7.4 (4.7)                         | 120   | 3.9 (2.7)                            | 1474  | 7.6 (4.9)                         | 89    | 3.9 (2.5)                            | 1314  | 6.5 (3.5)                         | 42    | 3.7 (2.2)                            | 855   | 6.5 (4.9)                         | 46    | 3.3 (2.1)                            | 985   | 8.4 (4.6)                         | 25    | 3.2 (2.3)                            | 587   |
| AE with Knee Rep                     | 4.7 (2.3)                         | 104   | 3.3 (1.4)                            | 2028  | 5.1 (2.3)                         | 118   | 3.2 (1.3)                            | 2420  | 4.7 (2.2)                         | 78    | 3.2 (1.3)                            | 2066  | 4.9 (1.8)                         | 28    | 3.0 (1.1)                            | 1217  | 4.6 (2.4)                         | 39    | 2.8 (1.3)                            | 1480  | 5.1 (3.9)                         | 20    | 2.7 (1.1)                            | 949   |
| Contrast Nephrop.                    | 9.2 (8.6)                         | 468   | 4.9 (5.3)                            | 3671  | 8.5 (6.6)                         | 437   | 4.5 (4.6)                            | 3324  | 9.3 (6.7)                         | 287   | 4.6 (5.0)                            | 2431  | 10.0 (9.4)                        | 249   | 4.3 (4.4)                            | 2040  | 8.5 (6.7)                         | 284   | 4.4 (4.4)                            | 2271  | 7.9 (5.9)                         | 203   | 3.9 (4.3)                            | 1946  |
| Mech Comp. w/CL                      | 14.9 (13.7)                       | 137   | 11.6 (9.4)                           | 3950  | 15.7 (11.1)                       | 142   | 11.2 (9.3)                           | 3556  | 17.4 (14.9)                       | 109   | 11.1 (8.6)                           | 3130  | 18.1 (14.7)                       | 69    | 11.5 (9.7)                           | 2004  | 15.2 (11.1)                       | 84    | 10.8 (8.5)                           | 2335  | 12.9 (8.6)                        | 32    | 10.1 (8.5)                           | 1175  |
| Post-op Cardiac AE                   | 18.7 (16.5)                       | 41    | 5.7 (6.3)                            | 9423  | 14.8 (10.6)                       | 42    | 5.2 (5.7)                            | 10145 | 13.0 (9.2)                        | 49    | 5.4 (5.6)                            | 8717  | 20.1 (20.4)                       | 20    | 5.5 (6.0)                            | 4937  | 15.4 (8.8)                        | 18    | 5.2 (5.5)                            | 5697  | 11.9 (8.6)                        | 14    | 4.8 (5.2)                            | 2929  |
| Post-op VTE                          | 17.4 (14.1)                       | 37    | 5.7 (6.4)                            | 9427  | 16.4 (10.2)                       | 30    | 5.3 (5.8)                            | 10157 | 13.3 (10.1)                       | 40    | 5.4 (5.6)                            | 8728  | 14.7 (8.0)                        | 25    | 5.5 (6.1)                            | 4932  | 15.1 (7.2)                        | 26    | 5.1 (5.5)                            | 5690  | 15.0 (11.0)                       | 6     | 4.8 (5.2)                            | 2937  |

<sup>42</sup> Note: Patients that died during their stay are not included in these LOS calculations, therefore the numbers of patients are often not consistent with those in Table S15. Patients “without this AE” are those who were exposed to the AE type but did not experience it; those “with this AE” experienced the AE. All patients are exposed to the MPSMS Fall and HAPU measures, for all other measures less than 100 percent of patients are exposed to the AE measure.

## Four Conditions, 2016-2019:

| MPSMS Adverse Event Type             | 2016 LOS of patients with this AE |       | 2016 LOS of patients without this AE |       | 2017 LOS of patients with this AE |       | 2017 LOS of patients without this AE |       | 2018 LOS of patients with this AE |       | 2018 LOS of patients without this AE |       | 2019 LOS of patients with this AE |       | 2019 LOS of patients without this AE |       | Combined 2010-2019 LOS of patients with this AE |       | Combined 2010-2019 LOS of patients without this AE |        |
|--------------------------------------|-----------------------------------|-------|--------------------------------------|-------|-----------------------------------|-------|--------------------------------------|-------|-----------------------------------|-------|--------------------------------------|-------|-----------------------------------|-------|--------------------------------------|-------|-------------------------------------------------|-------|----------------------------------------------------|--------|
|                                      | Mean (SD)                         | Total | Mean (SD)                            | Total | Mean (SD)                         | Total | Mean (SD)                            | Total | Mean (SD)                         | Total | Mean (SD)                            | Total | Mean (SD)                         | Total | Mean (SD)                            | Total | Mean (SD)                                       | Total | Mean (SD)                                          | Total  |
| <b>Adverse Drug Events</b>           |                                   |       |                                      |       |                                   |       |                                      |       |                                   |       |                                      |       |                                   |       |                                      |       |                                                 |       |                                                    |        |
| Digixon AE                           | N/A                               | 0     | 7.3 (7.5)                            | 502   | N/A                               | 0     | 7.0 (6.1)                            | 345   | N/A                               | 0     | 6.6 (4.9)                            | 136   | N/A                               | 0     | 6.4 (6.2)                            | 51    | 10.3 (5.0)                                      | 23    | 7.4 (7.6)                                          | 6249   |
| Hypoglycemic AE                      | 9.8 (9.8)                         | 405   | 5.3 (5.6)                            | 6055  | 9.7 (11.2)                        | 294   | 5.5 (5.9)                            | 4200  | 9.5 (9.9)                         | 168   | 5.6 (5.1)                            | 2074  | 11.9 (15.8)                       | 68    | 6.0 (6.6)                            | 1127  | 9.7 (9.7)                                       | 5179  | 5.8 (6.0)                                          | 56867  |
| IV Heparin AE                        | 16.2 (13.7)                       | 95    | 5.2 (6.2)                            | 1456  | 15.8 (15.9)                       | 63    | 5.3 (6.0)                            | 1159  | 12.7 (10.3)                       | 45    | 5.3 (5.5)                            | 755   | 23.3 (28.1)                       | 20    | 6.3 (7.5)                            | 399   | 14.1 (12.1)                                     | 1438  | 5.5 (6.3)                                          | 15258  |
| LMWH, etc., AE                       | 14.2 (13.0)                       | 139   | 4.7 (4.6)                            | 7054  | 12.9 (9.6)                        | 76    | 4.8 (5.0)                            | 4739  | 15.4 (10.6)                       | 35    | 4.9 (4.7)                            | 2208  | 13.7 (13.5)                       | 33    | 5.1 (6.2)                            | 1187  | 12.6 (10.3)                                     | 2398  | 5.1 (5.0)                                          | 68332  |
| Warfarin AEs                         | 15.9 (16.5)                       | 57    | 5.2 (5.6)                            | 1921  | 17.7 (19.1)                       | 40    | 5.5 (5.4)                            | 1218  | 15.8 (8.5)                        | 16    | 5.7 (6.3)                            | 496   | 16.2 (27.0)                       | 18    | 5.8 (6.1)                            | 227   | 13.7 (13.0)                                     | 1080  | 5.5 (5.4)                                          | 22771  |
| <b>General Adverse Events</b>        |                                   |       |                                      |       |                                   |       |                                      |       |                                   |       |                                      |       |                                   |       |                                      |       |                                                 |       |                                                    |        |
| HAPU                                 | 12.1 (11.5)                       | 630   | 4.3 (4.2)                            | 19419 | 10.6 (9.1)                        | 411   | 4.3 (4.6)                            | 13352 | 11.0 (10.1)                       | 260   | 4.3 (4.2)                            | 6539  | 13.6 (15.6)                       | 115   | 4.3 (4.4)                            | 3834  | 11.8 (10.7)                                     | 6999  | 4.5 (4.4)                                          | 175248 |
| Inpatient Falls                      | 8.7 (10.5)                        | 149   | 4.5 (4.7)                            | 19900 | 10.5 (9.8)                        | 109   | 4.5 (4.9)                            | 13654 | 9.5 (7.8)                         | 59    | 4.6 (4.7)                            | 6740  | 15.1 (20.6)                       | 25    | 4.5 (5.0)                            | 3924  | 9.2 (9.4)                                       | 1533  | 4.8 (4.9)                                          | 180714 |
| <b>Hospital-Acquired Infections</b>  |                                   |       |                                      |       |                                   |       |                                      |       |                                   |       |                                      |       |                                   |       |                                      |       |                                                 |       |                                                    |        |
| C diff                               | 17.8 (15.3)                       | 60    | 5.0 (5.2)                            | 14325 | 20.2 (19.7)                       | 37    | 5.0 (5.2)                            | 9722  | 17.7 (15.7)                       | 20    | 5.2 (5.2)                            | 4648  | 15.8 (9.1)                        | 6     | 5.0 (5.8)                            | 3061  | 17.1 (13.6)                                     | 571   | 5.4 (5.4)                                          | 133009 |
| CLABSI                               | 18.0 (5.7)                        | 2     | 10.8 (9.1)                           | 972   | 45.5 (49.9)                       | 4     | 10.4 (9.0)                           | 672   | 19.0                              | 1     | 10.4 (8.5)                           | 379   | 34.0                              | 1     | 10.5 (6.8)                           | 284   | 25.9 (18.6)                                     | 74    | 10.6 (8.4)                                         | 11508  |
| CAUTI                                | 14.5 (14.0)                       | 150   | 5.4 (5.5)                            | 6787  | 13.7 (11.5)                       | 99    | 5.7 (6.0)                            | 4372  | 12.6 (11.2)                       | 46    | 6.0 (5.8)                            | 2155  | 14.1 (13.1)                       | 22    | 5.8 (6.7)                            | 1501  | 13.0 (12.2)                                     | 2,077 | 5.6 (5.5)                                          | 72156  |
| MRSA                                 | 17.4 (9.5)                        | 7     | 4.4 (4.7)                            | 19675 | 35.8 (35.6)                       | 6     | 4.5 (4.7)                            | 13503 | 9.7 (6.1)                         | 3     | 4.6 (4.7)                            | 6700  | 8.0                               | 1     | 4.5 (5.1)                            | 3893  | 20.5 (15.7)                                     | 73    | 4.7 (4.9)                                          | 177990 |
| VRE                                  | 20.0                              | 1     | 4.5 (4.8)                            | 19989 | 60.0 (60.8)                       | 2     | 4.5 (4.9)                            | 13715 | N/A                               | 0     | 4.6 (4.8)                            | 6771  | N/A                               | 0     | 4.6 (5.3)                            | 3941  | 31.5 (20.8)                                     | 31    | 4.8 (4.9)                                          | 181537 |
| Post-op Pneumonia                    | 15.3 (11.7)                       | 66    | 4.3 (5.0)                            | 5897  | 16.2 (20.0)                       | 37    | 4.3 (4.8)                            | 3850  | 14.7 (10.1)                       | 27    | 4.5 (5.1)                            | 1919  | 20.1 (26.1)                       | 19    | 4.5 (5.0)                            | 1836  | 16.4 (14.2)                                     | 891   | 4.8 (5.1)                                          | 53996  |
| VAP                                  | 25.4 (17.0)                       | 26    | 15.4 (12.6)                          | 211   | 24.4 (23.6)                       | 20    | 14.6 (9.4)                           | 172   | 21.6 (12.9)                       | 10    | 12.5 (10.2)                          | 91    | 18.0 (11.0)                       | 10    | 18.0 (17.4)                          | 55    | 20.7 (14.9)                                     | 325   | 15.8 (11.9)                                        | 2419   |
| <b>Post-Procedure Adverse Events</b> |                                   |       |                                      |       |                                   |       |                                      |       |                                   |       |                                      |       |                                   |       |                                      |       |                                                 |       |                                                    |        |
| FAPCAP                               | 4.1 (4.2)                         | 51    | 4.7 (5.6)                            | 1700  | 6.0 (6.1)                         | 16    | 4.9 (7.2)                            | 1103  | 6.0 (7.8)                         | 31    | 4.8 (5.3)                            | 704   | 6.4 (4.7)                         | 9     | 5.7 (6.5)                            | 252   | 5.7 (5.5)                                       | 439   | 5.2 (5.7)                                          | 19495  |
| AE with Hip Rep                      | 6.1 (5.9)                         | 62    | 3.2 (2.4)                            | 1243  | 5.1 (2.7)                         | 31    | 3.0 (2.1)                            | 802   | 7.6 (9.5)                         | 20    | 3.1 (2.6)                            | 430   | 5.7 (4.7)                         | 14    | 2.8 (2.4)                            | 504   | 7.0 (5.1)                                       | 557   | 3.5 (2.4)                                          | 9512   |
| AE with Knee Rep                     | 3.8 (1.8)                         | 41    | 2.5 (1.2)                            | 2112  | 4.1 (3.1)                         | 32    | 2.3 (1.1)                            | 1305  | 3.5 (1.6)                         | 13    | 2.2 (1.0)                            | 597   | 4.4 (5.6)                         | 15    | 2.1 (1.1)                            | 453   | 4.6 (2.5)                                       | 488   | 2.9 (1.3)                                          | 14627  |
| Contrast Nephrop.                    | 8.6 (8.2)                         | 194   | 3.7 (3.9)                            | 2129  | 8.8 (11.8)                        | 144   | 4.0 (5.1)                            | 1558  | 7.7 (7.5)                         | 118   | 3.9 (4.0)                            | 959   | 9.4 (7.3)                         | 50    | 4.2 (4.4)                            | 396   | 8.8 (7.9)                                       | 2,434 | 4.3 (4.7)                                          | 20725  |
| Mech Comp. w/CL                      | 16.4 (14.3)                       | 59    | 11.1 (9.6)                           | 1968  | 15.2 (10.9)                       | 33    | 10.9 (10.0)                          | 1410  | 15.5 (13.7)                       | 31    | 10.6 (8.2)                           | 714   | 22.0 (18.2)                       | 13    | 10.9 (9.3)                           | 484   | 16.0 (13.1)                                     | 709   | 11.1 (9.2)                                         | 20726  |
| Post-op Cardiac AE                   | 14.5 (12.8)                       | 13    | 4.5 (5.5)                            | 6004  | 18.3 (26.7)                       | 18    | 4.5 (5.1)                            | 3918  | 12.9 (11.5)                       | 11    | 4.7 (5.4)                            | 1961  | 14.2 (15.6)                       | 12    | 4.7 (6.0)                            | 1859  | 15.6 (14.5)                                     | 238   | 5.2 (5.7)                                          | 55590  |
| Post-op VTE                          | 23.0 (23.5)                       | 23    | 4.4 (5.2)                            | 5994  | 17.4 (10.5)                       | 15    | 4.5 (5.4)                            | 3921  | 15.0 (9.4)                        | 5     | 4.8 (5.4)                            | 1967  | 12.9 (11.4)                       | 14    | 4.7 (6.1)                            | 1857  | 16.2 (12.6)                                     | 228   | 5.2 (5.7)                                          | 55603  |

**All-Other Conditions, 2012-2016:**

| MPSMS Adverse Event Type             | 2012 LOS of patients with this AE |       | 2012 LOS of patients without this AE |       | 2013 LOS of patients with this AE |       | 2013 LOS of patients without this AE |       | 2014 LOS of patients with this AE |       | 2014 LOS of patients without this AE |       | 2015 LOS of patients with this AE |       | 2015 LOS of patients without this AE |       | 2016 LOS of patients with this AE |       | 2016 LOS of patients without this AE |       |
|--------------------------------------|-----------------------------------|-------|--------------------------------------|-------|-----------------------------------|-------|--------------------------------------|-------|-----------------------------------|-------|--------------------------------------|-------|-----------------------------------|-------|--------------------------------------|-------|-----------------------------------|-------|--------------------------------------|-------|
|                                      | Mean (SD)                         | Total | Mean (SD)                            | Total | Mean (SD)                         | Total | Mean (SD)                            | Total | Mean (SD)                         | Total | Mean (SD)                            | Total | Mean (SD)                         | Total | Mean (SD)                            | Total | Mean (SD)                         | Total | Mean (SD)                            | Total |
| <b>Adverse Drug Events</b>           |                                   |       |                                      |       |                                   |       |                                      |       |                                   |       |                                      |       |                                   |       |                                      |       |                                   |       |                                      |       |
| Digixon AE                           | 8.0                               | 1     | 7.1 (6.9)                            | 133   | N/A                               | 0     | 6.0 (5.0)                            | 59    | 17.0                              | 1     | 5.6 (3.7)                            | 41    | N/A                               | 0     | 6.2 (6.2)                            | 68    | N/A                               | 0     | 6.7 (7.0)                            | 68    |
| Hypoglycemic AE                      | 8.7 (10.2)                        | 160   | 4.7 (4.7)                            | 2006  | 7.1 (5.6)                         | 87    | 4.7 (5.9)                            | 1072  | 7.4 (8.4)                         | 66    | 4.2 (3.8)                            | 855   | 7.4 (8.9)                         | 105   | 4.6 (4.9)                            | 1330  | 9.4 (14.0)                        | 112   | 4.5 (4.5)                            | 1501  |
| IV Heparin AE                        | 11.9 (11.9)                       | 19    | 5.7 (5.1)                            | 181   | 15.1 (6.5)                        | 8     | 6.3 (7.4)                            | 96    | 12.2 (7.4)                        | 13    | 4.3 (3.4)                            | 98    | 13.0 (7.5)                        | 11    | 5.6 (4.8)                            | 105   | 12.6 (11.2)                       | 10    | 6.5 (9.1)                            | 126   |
| LMWH, etc., AE                       | 9.7 (6.7)                         | 38    | 4.7 (5.2)                            | 1886  | 14.4 (8.5)                        | 18    | 4.5 (4.2)                            | 1208  | 11.9 (8.2)                        | 17    | 4.1 (5.0)                            | 1002  | 12.9 (9.4)                        | 17    | 4.3 (4.3)                            | 1486  | 13.3 (10.0)                       | 23    | 4.4 (4.6)                            | 1772  |
| Warfarin AEs                         | 11.2 (5.6)                        | 26    | 5.1 (4.4)                            | 627   | 15.6 (9.3)                        | 11    | 5.7 (5.2)                            | 347   | 15.3 (9.9)                        | 8     | 4.7 (4.0)                            | 233   | 9.4 (7.9)                         | 14    | 5.3 (6.2)                            | 316   | 9.5 (4.3)                         | 13    | 5.1 (4.8)                            | 304   |
| <b>General Adverse Events</b>        |                                   |       |                                      |       |                                   |       |                                      |       |                                   |       |                                      |       |                                   |       |                                      |       |                                   |       |                                      |       |
| HAPU                                 | 9.7 (10.9)                        | 210   | 3.7 (3.9)                            | 9211  | 10.7 (12.4)                       | 107   | 3.7 (3.8)                            | 5111  | 10.0 (9.1)                        | 71    | 3.5 (3.8)                            | 4175  | 9.8 (9.6)                         | 113   | 3.7 (3.8)                            | 5862  | 12.2 (13.8)                       | 134   | 3.7 (3.8)                            | 6820  |
| Inpatient Falls                      | 7.9 (13.4)                        | 83    | 3.8 (4.1)                            | 9338  | 8.2 (9.5)                         | 38    | 3.8 (4.2)                            | 5180  | 10.1 (19.2)                       | 31    | 3.6 (3.7)                            | 4215  | 6.6 (4.6)                         | 46    | 3.8 (4.1)                            | 5929  | 7.4 (5.6)                         | 51    | 3.8 (4.3)                            | 6903  |
| <b>Hospital-Acquired Infections</b>  |                                   |       |                                      |       |                                   |       |                                      |       |                                   |       |                                      |       |                                   |       |                                      |       |                                   |       |                                      |       |
| C diff                               | 13.8 (7.6)                        | 10    | 4.0 (4.6)                            | 6031  | 20.4 (34.7)                       | 8     | 3.9 (4.0)                            | 3363  | 11.0 (6.2)                        | 11    | 3.9 (4.3)                            | 2592  | 18.6 (18.5)                       | 11    | 4.2 (4.3)                            | 3721  | 13.4 (13.6)                       | 13    | 4.3 (4.9)                            | 4301  |
| CLABSI                               | 8.0                               | 1     | 7.7 (6.4)                            | 258   | N/A                               | 0     | 8.5 (9.0)                            | 142   | 27.0                              | 1     | 8.4 (7.6)                            | 110   | N/A                               | 0     | 8.2 (8.6)                            | 154   | 36.5 (41.7)                       | 2     | 9.5 (9.9)                            | 189   |
| CAUTI                                | 11.7 (16.4)                       | 53    | 3.8 (4.3)                            | 2594  | 9.8 (6.9)                         | 33    | 3.9 (4.4)                            | 1392  | 9.0 (5.8)                         | 15    | 3.8 (3.9)                            | 1075  | 13.1 (9.1)                        | 28    | 4.2 (4.5)                            | 1396  | 11.5 (6.5)                        | 31    | 4.4 (5.6)                            | 1607  |
| MRSA                                 | 15.5 (2.1)                        | 2     | 3.7 (3.9)                            | 9203  | N/A                               | 0     | 3.8 (4.2)                            | 5104  | 14.0 (11.3)                       | 3     | 3.6 (4.0)                            | 4173  | 29.0                              | 1     | 3.8 (4.0)                            | 5849  | N/A                               | 0     | 3.8 (4.3)                            | 6810  |
| VRE                                  | 22.0                              | 1     | 3.8 (4.1)                            | 9375  | 10.0 (4.6)                        | 3     | 3.8 (4.2)                            | 5203  | 10.0                              | 1     | 3.6 (4.0)                            | 4230  | N/A                               | 0     | 3.8 (4.1)                            | 5944  | N/A                               | 0     | 3.9 (4.2)                            | 6933  |
| VAP                                  | 9.0 (2.0)                         | 4     | 12.7 (7.8)                           | 47    | 10.0                              | 1     | 15.4 (18.4)                          | 21    | 8.7 (9.8)                         | 3     | 12.0 (7.6)                           | 18    | 14.3 (7.6)                        | 3     | 12.2 (10.5)                          | 46    | 50.0 (29.3)                       | 4     | 14.9 (12.4)                          | 40    |
| <b>Post-Procedure Adverse Events</b> |                                   |       |                                      |       |                                   |       |                                      |       |                                   |       |                                      |       |                                   |       |                                      |       |                                   |       |                                      |       |
| FAPCAP                               | 2.3 (0.6)                         | 3     | 5.1 (7.2)                            | 136   | 1.0                               | 1     | 4.6 (5.1)                            | 85    | 11.3 (7.6)                        | 3     | 4.7 (4.4)                            | 73    | 3.0 (1.4)                         | 2     | 5.2 (6.1)                            | 116   | N/A                               | 0     | 6.1 (7.9)                            | 125   |
| Contrast Nephrop.                    | 9.8 (12.6)                        | 11    | 4.3 (4.6)                            | 145   | 9.7 (7.7)                         | 7     | 3.7 (4.2)                            | 93    | 5.9 (3.1)                         | 8     | 4.4 (4.4)                            | 88    | 5.1 (3.2)                         | 9     | 4.6 (5.7)                            | 123   | 9.1 (8.7)                         | 8     | 4.5 (5.0)                            | 144   |
| Mech Comp. w/CL                      | 9.1 (6.0)                         | 16    | 8.5 (8.4)                            | 500   | 14.1 (10.9)                       | 10    | 8.3 (9.2)                            | 287   | 15.4 (10.7)                       | 5     | 8.2 (6.8)                            | 222   | 10.3 (3.7)                        | 9     | 8.5 (7.9)                            | 367   | 14.6 (17.2)                       | 12    | 9.4 (10.1)                           | 440   |

### All-Other Conditions, 2017-2019:

| MPSMS Adverse Event Type             | 2017 LOS of patients with this AE |       | 2017 LOS of patients without this AE |       | 2018 LOS of patients with this AE |       | 2018 LOS of patients without this AE |       | 2019 LOS of patients with this AE |       | 2019 LOS of patients without this AE |       | Combined 2012-2019 LOS of patients with this AE |       | Combined 2012-2019 LOS of patients without this AE |       |
|--------------------------------------|-----------------------------------|-------|--------------------------------------|-------|-----------------------------------|-------|--------------------------------------|-------|-----------------------------------|-------|--------------------------------------|-------|-------------------------------------------------|-------|----------------------------------------------------|-------|
|                                      | Mean (SD)                         | Total | Mean (SD)                            | Total | Mean (SD)                         | Total | Mean (SD)                            | Total | Mean (SD)                         | Total | Mean (SD)                            | Total | Mean (SD)                                       | Total | Mean (SD)                                          | Total |
| <b>Adverse Drug Events</b>           |                                   |       |                                      |       |                                   |       |                                      |       |                                   |       |                                      |       |                                                 |       |                                                    |       |
| Digixon AE                           | 9.0                               | 1     | 6.5 (8.0)                            | 72    | N/A                               | 0     | 7.1 (7.3)                            | 74    | N/A                               | 0     | 6.2 (7.7)                            | 37    | 11.3 (4.9)                                      | 3     | 6.6 (6.7)                                          | 552   |
| Hypoglycemic AE                      | 8.0 (9.5)                         | 105   | 4.7 (4.8)                            | 1757  | 8.6 (8.8)                         | 155   | 4.8 (4.7)                            | 1742  | 7.9 (7.5)                         | 54    | 4.7 (5.3)                            | 1115  | 8.2 (9.7)                                       | 844   | 4.6 (4.8)                                          | 11378 |
| IV Heparin AE                        | 12.0 (11.7)                       | 10    | 5.6 (5.0)                            | 173   | 17.1 (12.8)                       | 9     | 7.0 (8.1)                            | 205   | 8.3 (5.8)                         | 7     | 6.3 (5.7)                            | 116   | 12.7 (9.8)                                      | 87    | 6.0 (6.5)                                          | 1100  |
| LMWH, etc., AE                       | 14.0 (10.5)                       | 27    | 4.4 (4.6)                            | 1961  | 10.2 (8.3)                        | 25    | 4.5 (4.6)                            | 2018  | 12.3 (9.6)                        | 15    | 4.8 (6.4)                            | 1230  | 12.1 (8.8)                                      | 180   | 4.5 (4.9)                                          | 12562 |
| Warfarin AEs                         | 9.0 (4.3)                         | 10    | 5.4 (5.6)                            | 322   | 10.8 (8.8)                        | 14    | 6.5 (6.4)                            | 263   | 9.5 (4.9)                         | 6     | 5.5 (4.5)                            | 143   | 11.1 (7.2)                                      | 102   | 5.4 (5.2)                                          | 2555  |
| <b>General Adverse Events</b>        |                                   |       |                                      |       |                                   |       |                                      |       |                                   |       |                                      |       |                                                 |       |                                                    |       |
| HAPU                                 | 10.2 (9.4)                        | 151   | 3.8 (4.0)                            | 7593  | 10.3 (9.4)                        | 193   | 3.8 (3.9)                            | 7541  | 10.8 (12.8)                       | 135   | 3.9 (4.4)                            | 4592  | 10.4 (11.0)                                     | 1114  | 3.7 (3.9)                                          | 50903 |
| Inpatient Falls                      | 7.3 (6.0)                         | 59    | 3.9 (4.3)                            | 7685  | 7.2 (6.3)                         | 69    | 3.9 (4.2)                            | 7665  | 9.5 (10.4)                        | 44    | 4.1 (4.9)                            | 4683  | 7.9 (10.0)                                      | 421   | 3.8 (4.2)                                          | 51596 |
| <b>Hospital-Acquired Infections</b>  |                                   |       |                                      |       |                                   |       |                                      |       |                                   |       |                                      |       |                                                 |       |                                                    |       |
| C diff                               | 11.7 (8.0)                        | 9     | 4.4 (4.6)                            | 4873  | 14.9 (13.4)                       | 8     | 4.5 (4.6)                            | 4831  | 17.2 (7.6)                        | 5     | 4.5 (5.6)                            | 3019  | 14.8 (15.5)                                     | 75    | 4.2 (4.6)                                          | 32729 |
| CLABSI                               | 63.0                              | 1     | 9.1 (8.6)                            | 198   | N/A                               | 0     | 8.5 (7.7)                            | 231   | 17.0                              | 1     | 10.6 (11.5)                          | 141   | 31.3 (26.7)                                     | 6     | 8.8 (8.6)                                          | 1423  |
| CAUTI                                | 11.8 (11.2)                       | 31    | 4.3 (4.9)                            | 1679  | 9.8 (7.4)                         | 30    | 4.5 (4.8)                            | 1718  | 13.3 (8.7)                        | 19    | 4.6 (5.4)                            | 1064  | 11.3 (10.6)                                     | 240   | 4.2 (4.6)                                          | 12524 |
| MRSA                                 | 11.8 (2.2)                        | 4     | 3.9 (4.3)                            | 7586  | N/A                               | 0     | 3.9 (4.2)                            | 7584  | N/A                               | 0     | 4.1 (4.9)                            | 4645  | 14.9 (7.6)                                      | 10    | 3.8 (4.2)                                          | 50953 |
| VRE                                  | N/A                               | 0     | 3.9 (4.3)                            | 7710  | 63.0                              | 1     | 4.0 (4.2)                            | 7710  | N/A                               | 0     | 4.1 (5.0)                            | 4717  | 20.8 (21.4)                                     | 6     | 3.9 (4.2)                                          | 51820 |
| VAP                                  | 18.0 (5.7)                        | 4     | 11.1 (9.2)                           | 53    | 17.0 (10.9)                       | 7     | 11.5 (9.6)                           | 61    | 34.6 (19.4)                       | 8     | 13.4 (9.6)                           | 41    | 23.0 (19.4)                                     | 34    | 12.6 (10.5)                                        | 327   |
| <b>Post-Procedure Adverse Events</b> |                                   |       |                                      |       |                                   |       |                                      |       |                                   |       |                                      |       |                                                 |       |                                                    |       |
| FAPCAP                               | 6.0 (5.6)                         | 3     | 5.2 (6.8)                            | 141   | 7.8 (12.6)                        | 6     | 5.6 (6.9)                            | 151   | 6.0 (4.3)                         | 4     | 7.2 (11.5)                           | 72    | 6.2 (7.6)                                       | 22    | 5.4 (7.2)                                          | 899   |
| Contrast Nephrop.                    | 12.1 (15.4)                       | 14    | 3.5 (3.1)                            | 162   | 9.7 (8.3)                         | 18    | 4.3 (5.7)                            | 187   | 22.9 (26.2)                       | 7     | 4.4 (6.1)                            | 103   | 10.3 (12.5)                                     | 82    | 4.2 (4.9)                                          | 1045  |
| Mech Comp. w/CL                      | 20.6 (15.3)                       | 13    | 9.0 (8.2)                            | 526   | 10.1 (10.6)                       | 15    | 9.2 (8.0)                            | 581   | 14.5 (10.0)                       | 11    | 9.8 (9.7)                            | 356   | 13.3 (11.6)                                     | 91    | 8.9 (8.6)                                          | 3279  |

**Four Conditions and All-Other Conditions, 2010-2019 (2012-2019 for All-Other Conditions):**

| <b>Overall LOS With and Without Adverse Events</b> |                |       |                   |        |
|----------------------------------------------------|----------------|-------|-------------------|--------|
| <b>Year</b>                                        | <b>With AE</b> |       | <b>Without AE</b> |        |
|                                                    | Mean (SD)      | Total | Mean (SD)         | Total  |
| <b>Four Conditions</b>                             |                |       |                   |        |
| <b>2010</b>                                        | 10.2 (9.0)     | 4420  | 4.3 (3.8)         | 27706  |
| <b>2011</b>                                        | 9.6 (8.8)      | 4362  | 4.2 (3.5)         | 28065  |
| <b>2012</b>                                        | 10.1 (8.7)     | 3309  | 4.3 (3.7)         | 22701  |
| <b>2013</b>                                        | 10.3 (9.7)     | 2001  | 4.2 (3.6)         | 15183  |
| <b>2014</b>                                        | 9.9 (8.9)      | 2200  | 4.1 (3.4)         | 16449  |
| <b>2015</b>                                        | 9.1 (8.1)      | 1195  | 3.9 (3.5)         | 10096  |
| <b>2016</b>                                        | 10.0 (9.9)     | 1802  | 4.0 (3.5)         | 18247  |
| <b>2017</b>                                        | 10.0 (10.0)    | 1224  | 4.0 (3.7)         | 12539  |
| <b>2018</b>                                        | 9.2 (8.8)      | 746   | 4.0 (3.6)         | 6053   |
| <b>2019</b>                                        | 10.9 (11.5)    | 376   | 3.9 (3.5)         | 3573   |
| <b>2010-2019</b>                                   | 9.9 (9.1)      | 21639 | 4.1 (3.6)         | 160608 |
| <b>All-Other Conditions</b>                        |                |       |                   |        |
| <b>2012</b>                                        | 8.8 (9.7)      | 562   | 3.5 (3.4)         | 8859   |
| <b>2013</b>                                        | 9.1 (9.4)      | 292   | 3.5 (3.5)         | 4926   |
| <b>2014</b>                                        | 9.0 (10.4)     | 221   | 3.4 (3.1)         | 4025   |
| <b>2015</b>                                        | 8.6 (7.9)      | 327   | 3.6 (3.6)         | 5648   |
| <b>2016</b>                                        | 9.7 (10.8)     | 365   | 3.5 (3.4)         | 6589   |
| <b>2017</b>                                        | 9.3 (8.9)      | 398   | 3.7 (3.7)         | 7346   |
| <b>2018</b>                                        | 8.8 (8.3)      | 482   | 3.7 (3.6)         | 7252   |
| <b>2019</b>                                        | 10.4 (11.7)    | 282   | 3.7 (3.9)         | 4445   |
| <b>2012-2019</b>                                   | 9.1 (9.6)      | 2929  | 3.6 (3.5)         | 49088  |

**eFigure 1A.** Risk-Adjusted Annual Trend in the Rate of Occurrence of Adverse Events for Which Patients Were at Risk for Five Patient Groups for All Adverse Events and for Four Adverse Event Domains, 2010-2019 (2012-2019 for All-other Conditions)

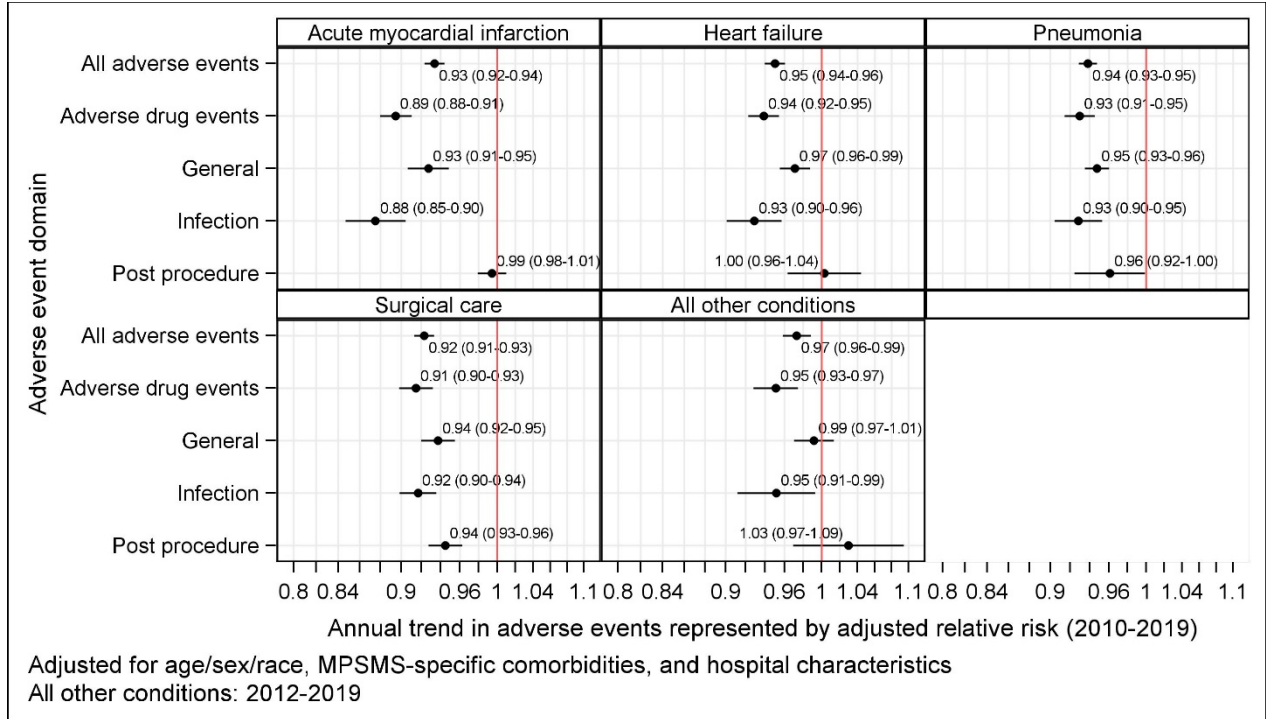

**eFigure 1B.** Risk-Adjusted Annual Trend in the Proportion of Patients with One or More Adverse Events for Five Patient Groups for All Adverse Events and for Four Adverse Event Domains, 2010-2019 (2012-2019 for All-other Conditions)

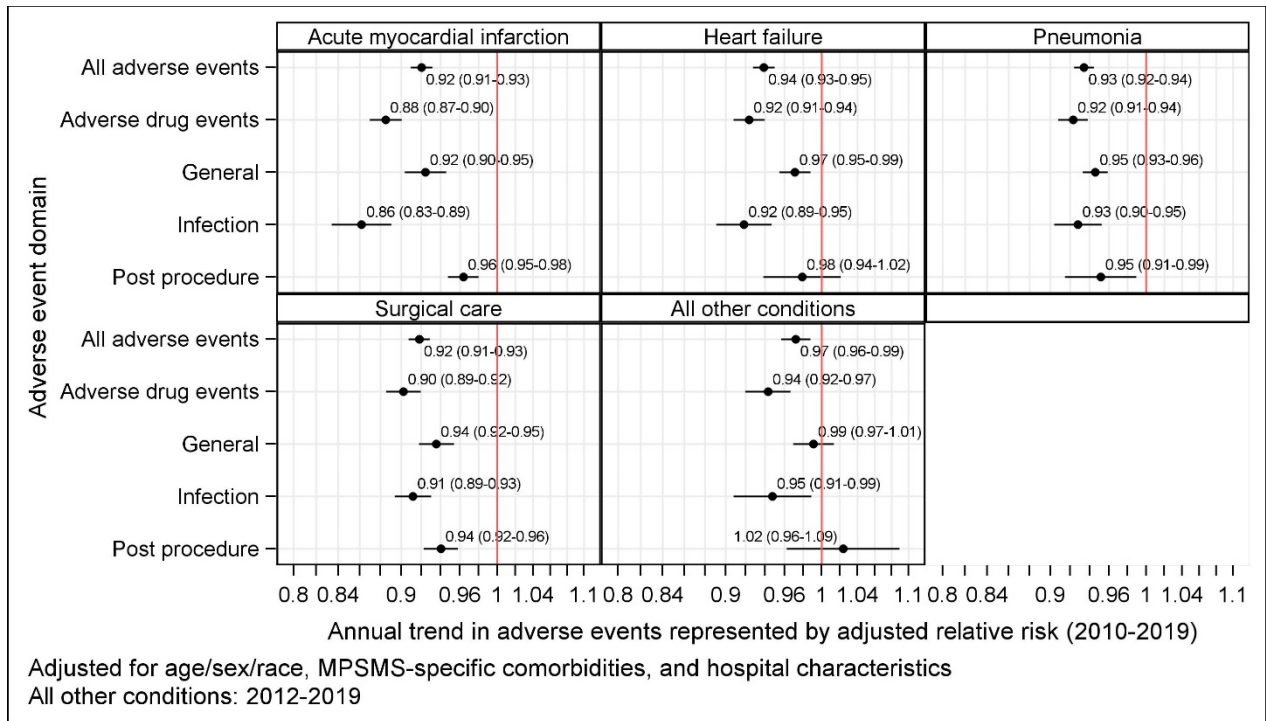

**eFigure 2A.** Adjusted Annual Changes in Adverse Events by Year and Four Conditions (Referred to 2010)

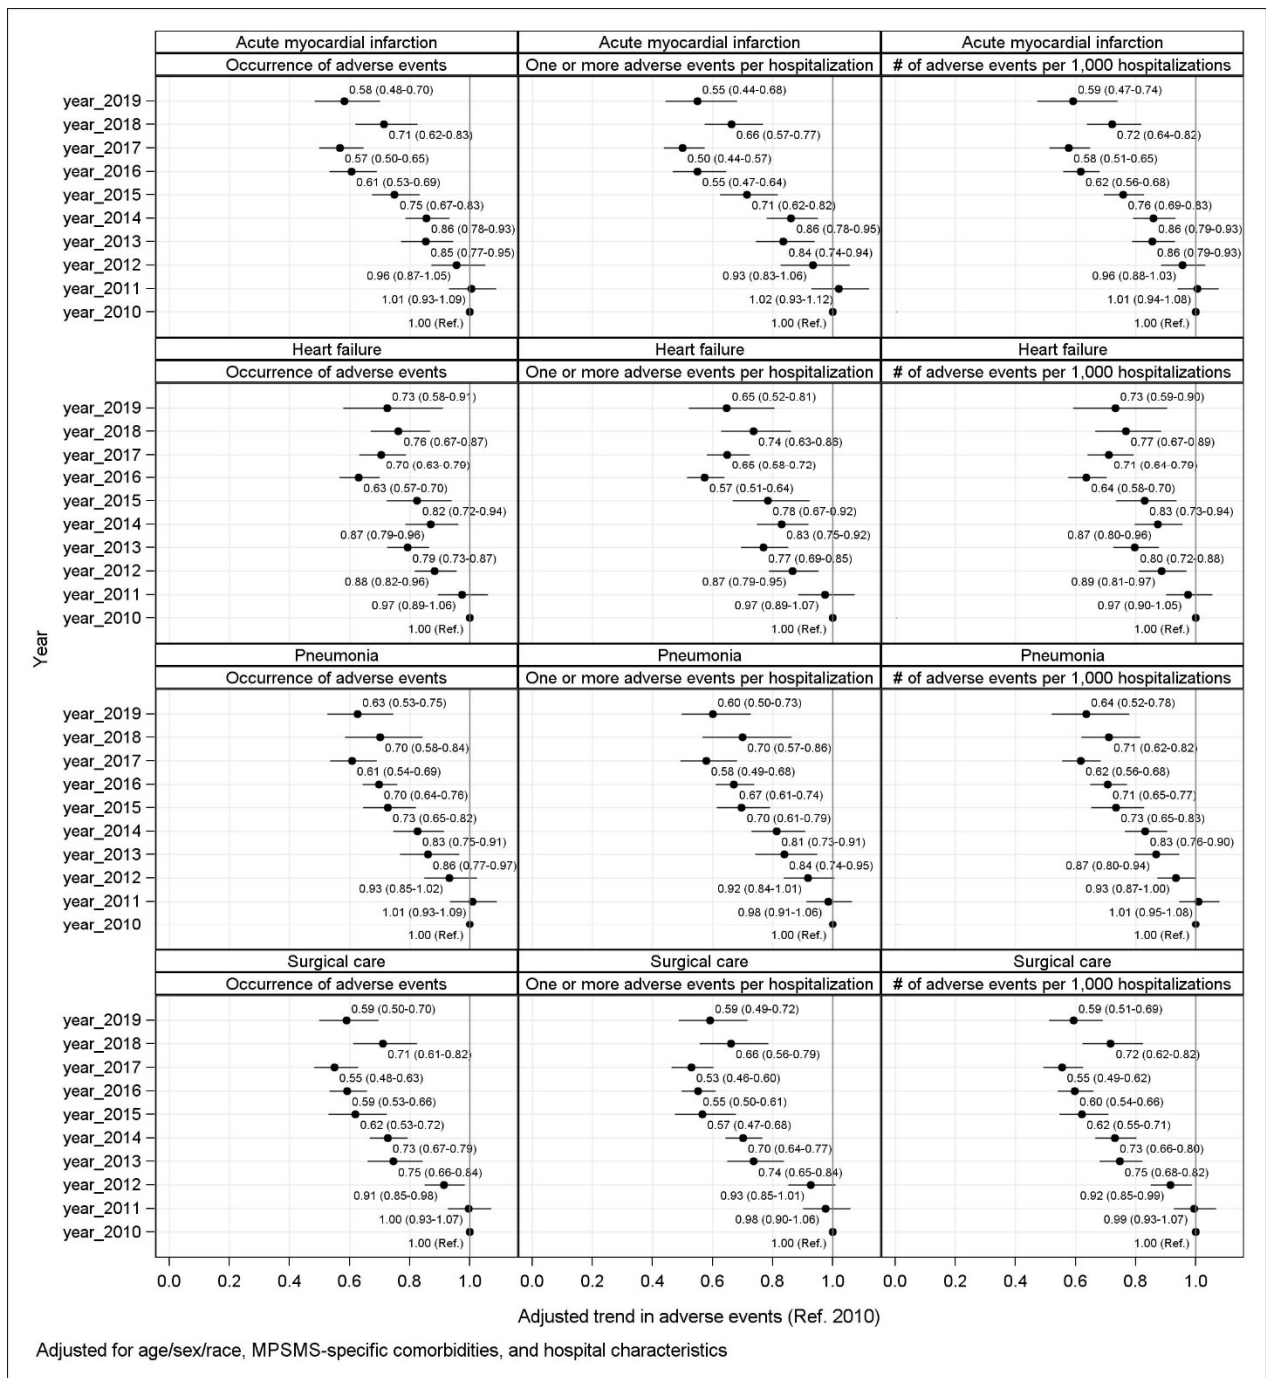



**eFigure 2B.** Adjusted Annual Changes in Adverse Events by Year (Referred to 2012, All-Other Conditions)

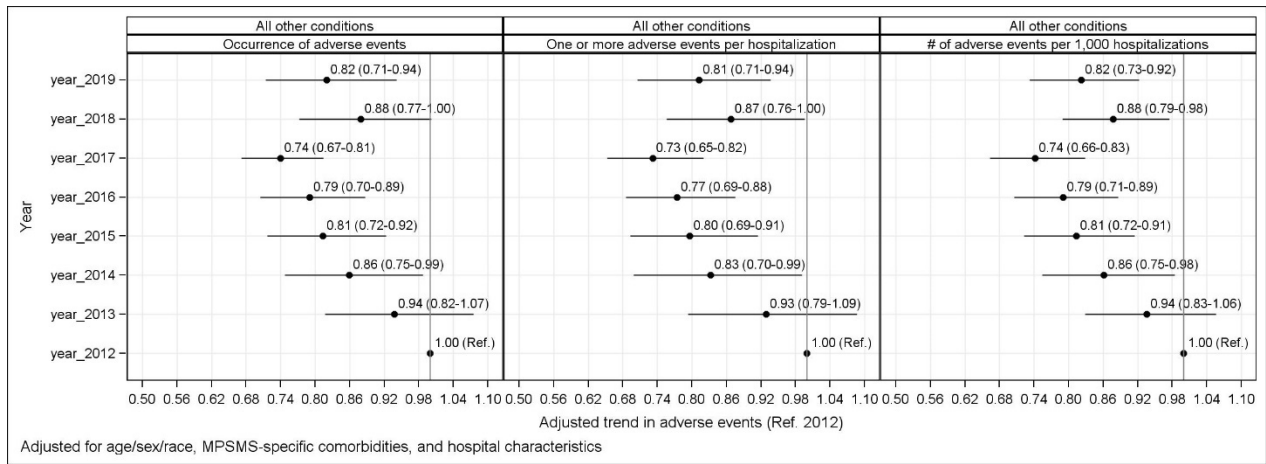

**eFigure 3.** Patients 65 years old and over only: Risk-Adjusted Annual Change in Adverse Events by Clinical Domains and Overall, 2010-2019 (2012-2019 for “All-Other Conditions”)

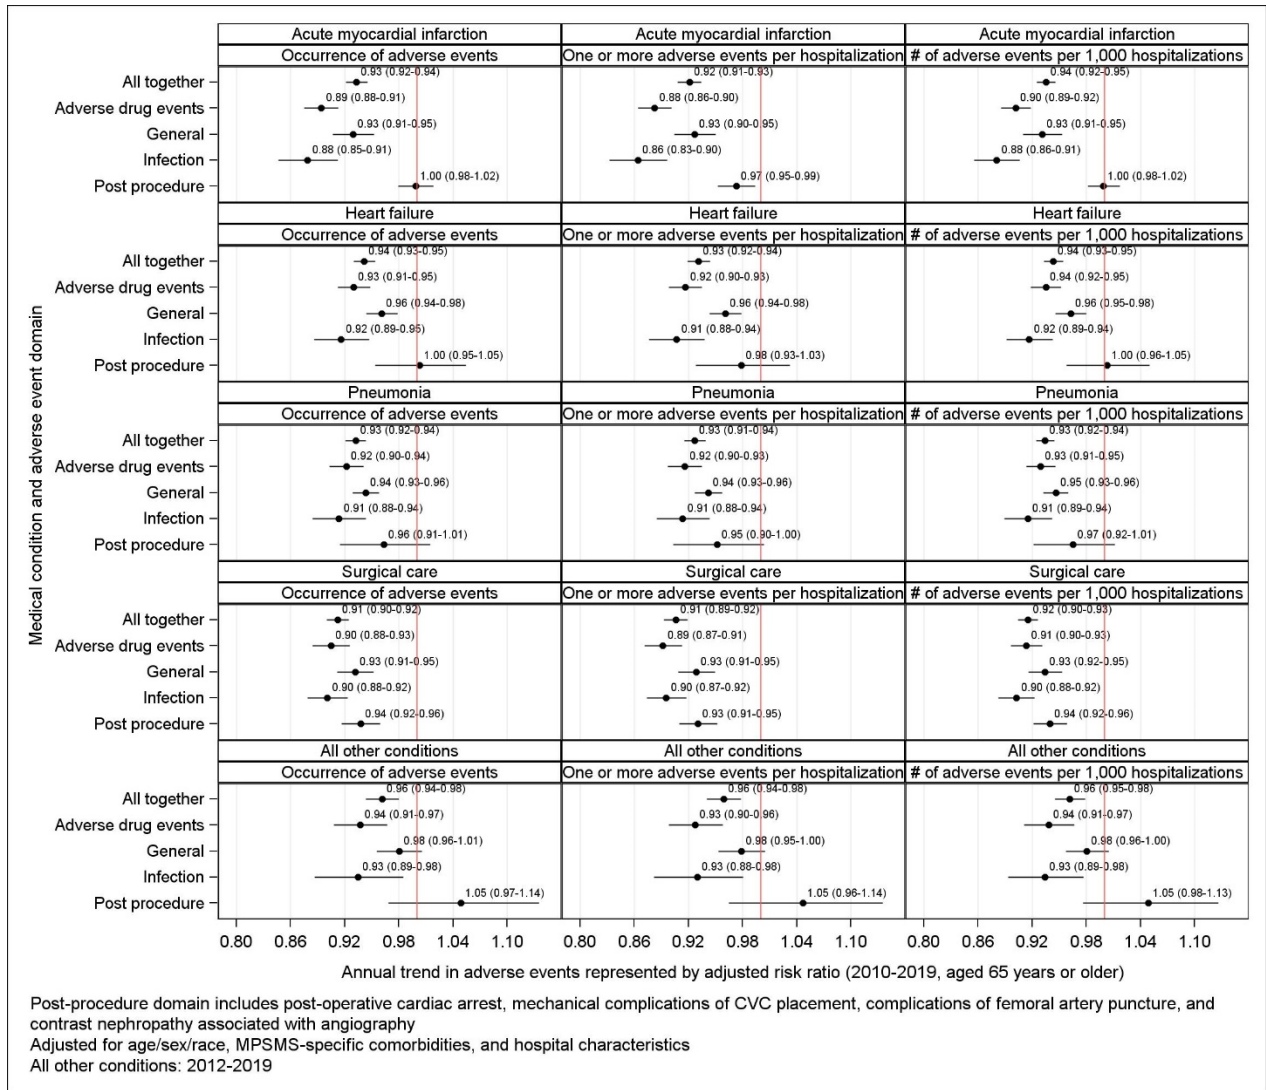

**eFigure 4. Risk-Adjusted Annual Change in Adverse Events by Clinical Domains and Overall (including Elixhauser comorbidities (2012-2019 for “All-Other Conditions”))**

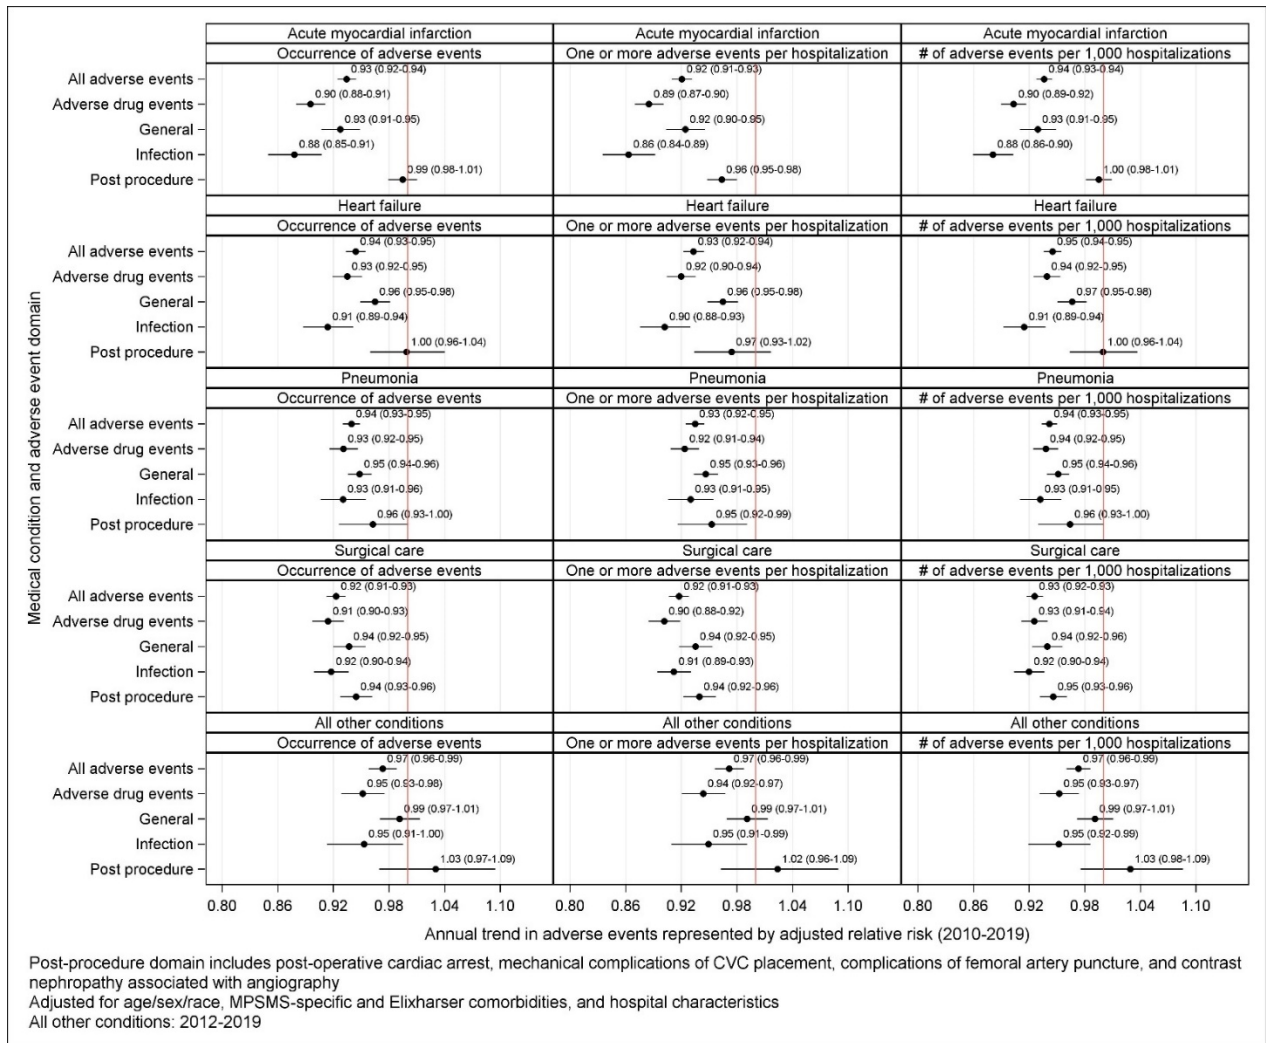

**eFigure 5. Risk-Adjusted Annual Change by Clinical Domains and Overall (2010-2014 and 2014 to 2019)**

**2010-2014 only:**

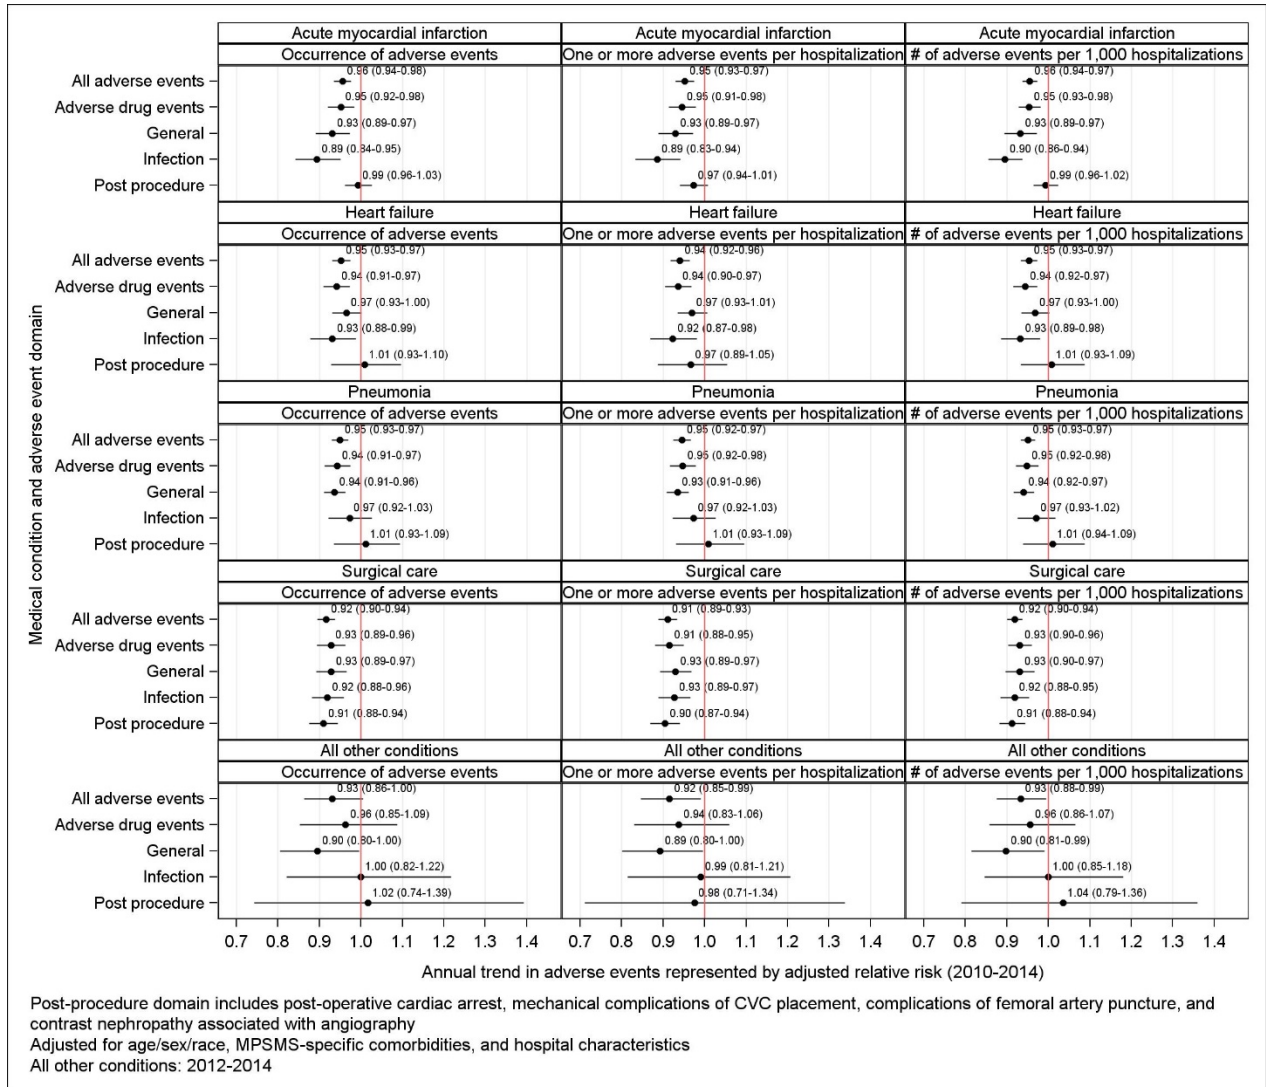

2014 to 2019 only:

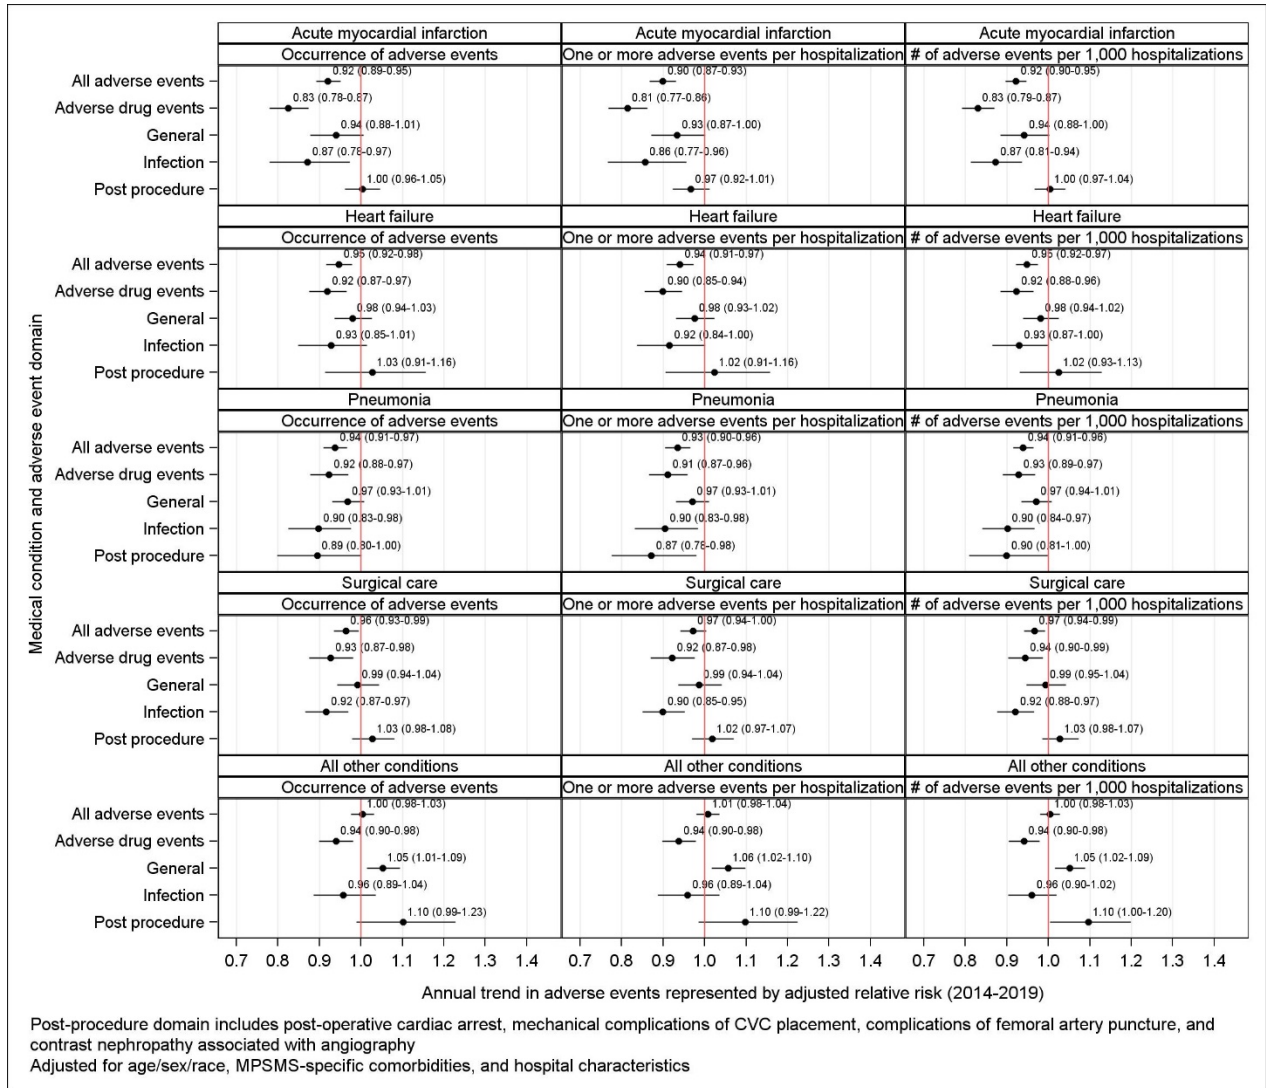

**eFigure 6.** Observed Change in Number of Adverse Events per 1,000 Discharges by Age, Race, and Sex (gender), for the Five Patient Demographical Groups

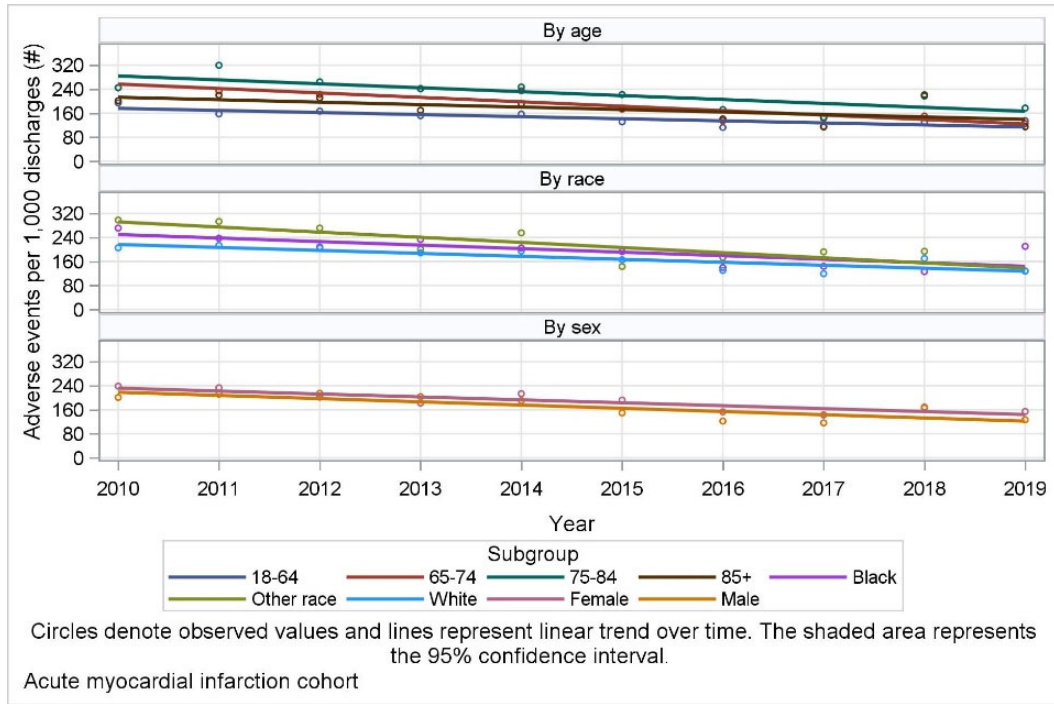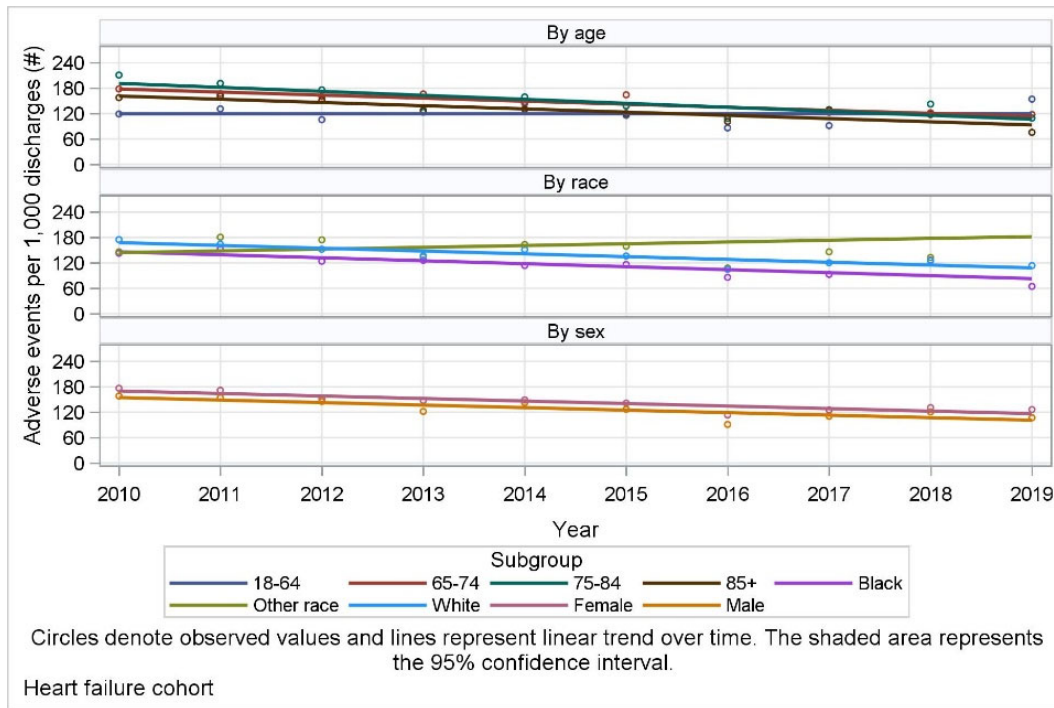

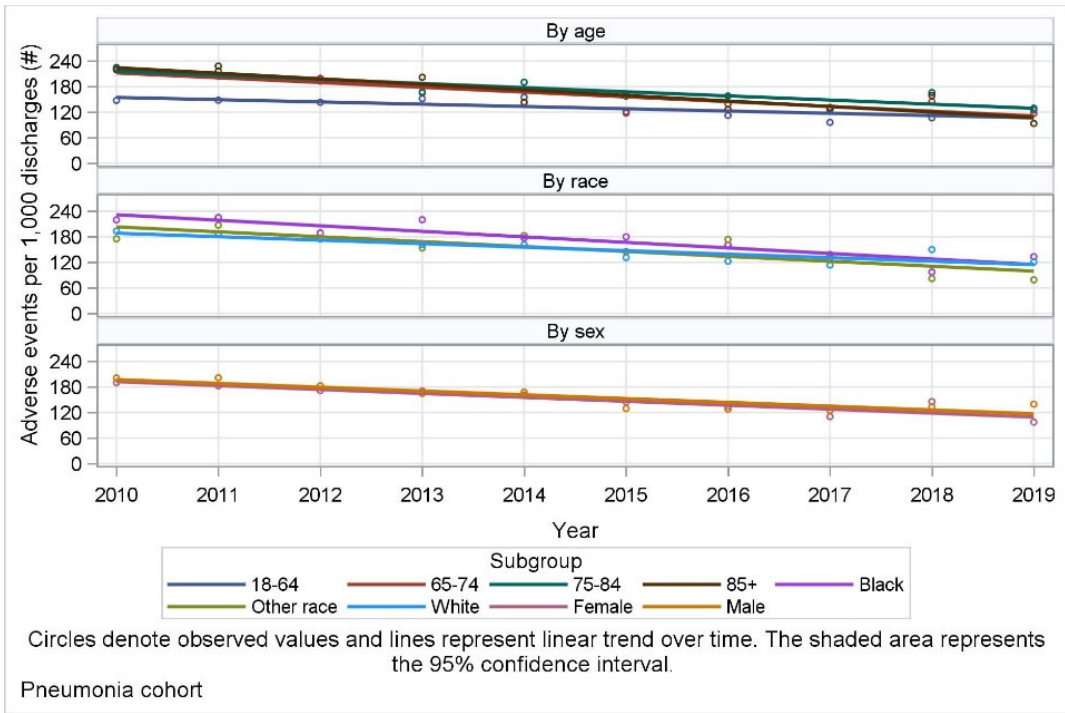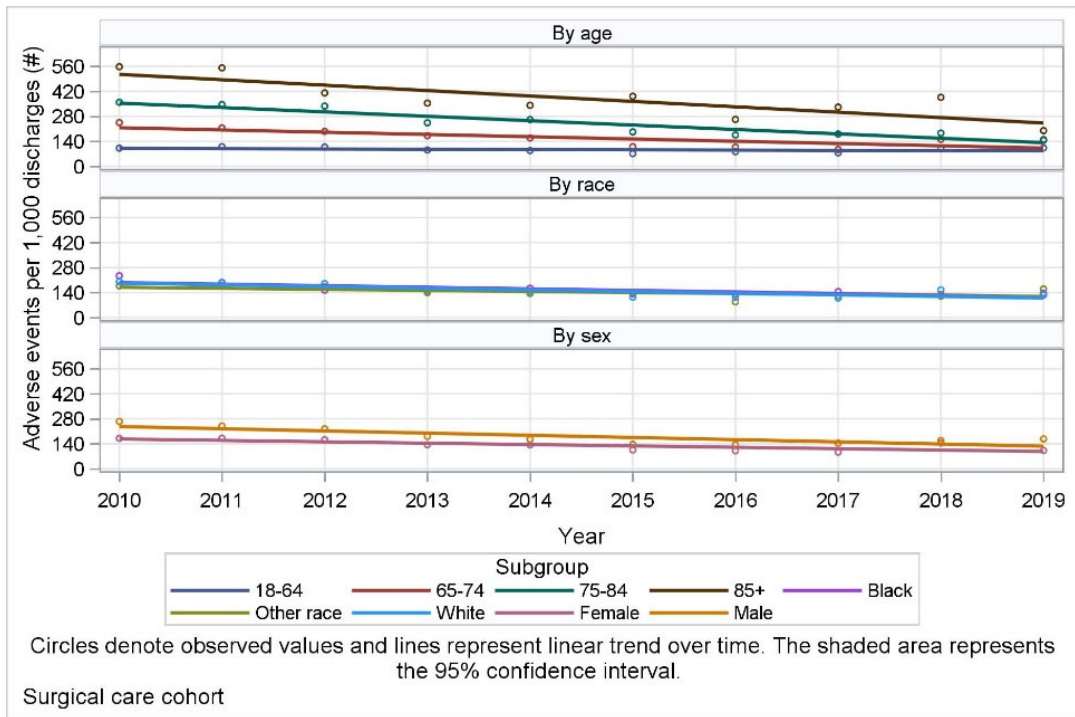

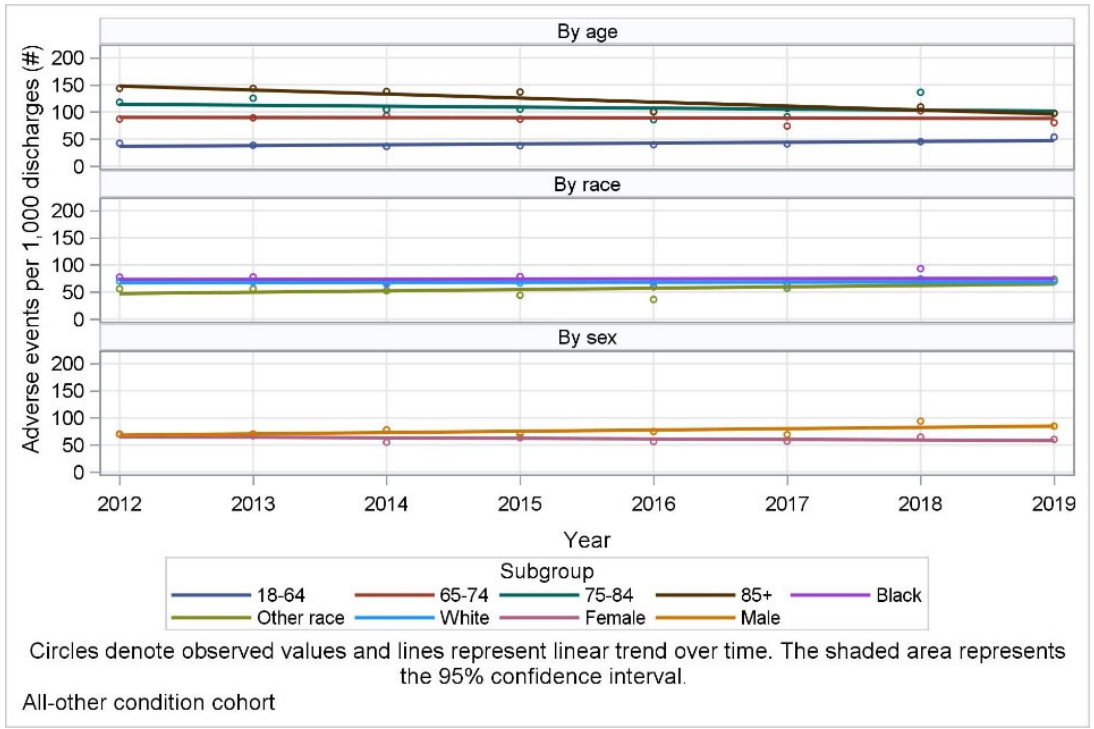



**eFigure 7.** Observed Change in Number of Adverse Events per 1,000 Discharges by Region of the United States (as defined by US Census Bureau) and by Patient Groups

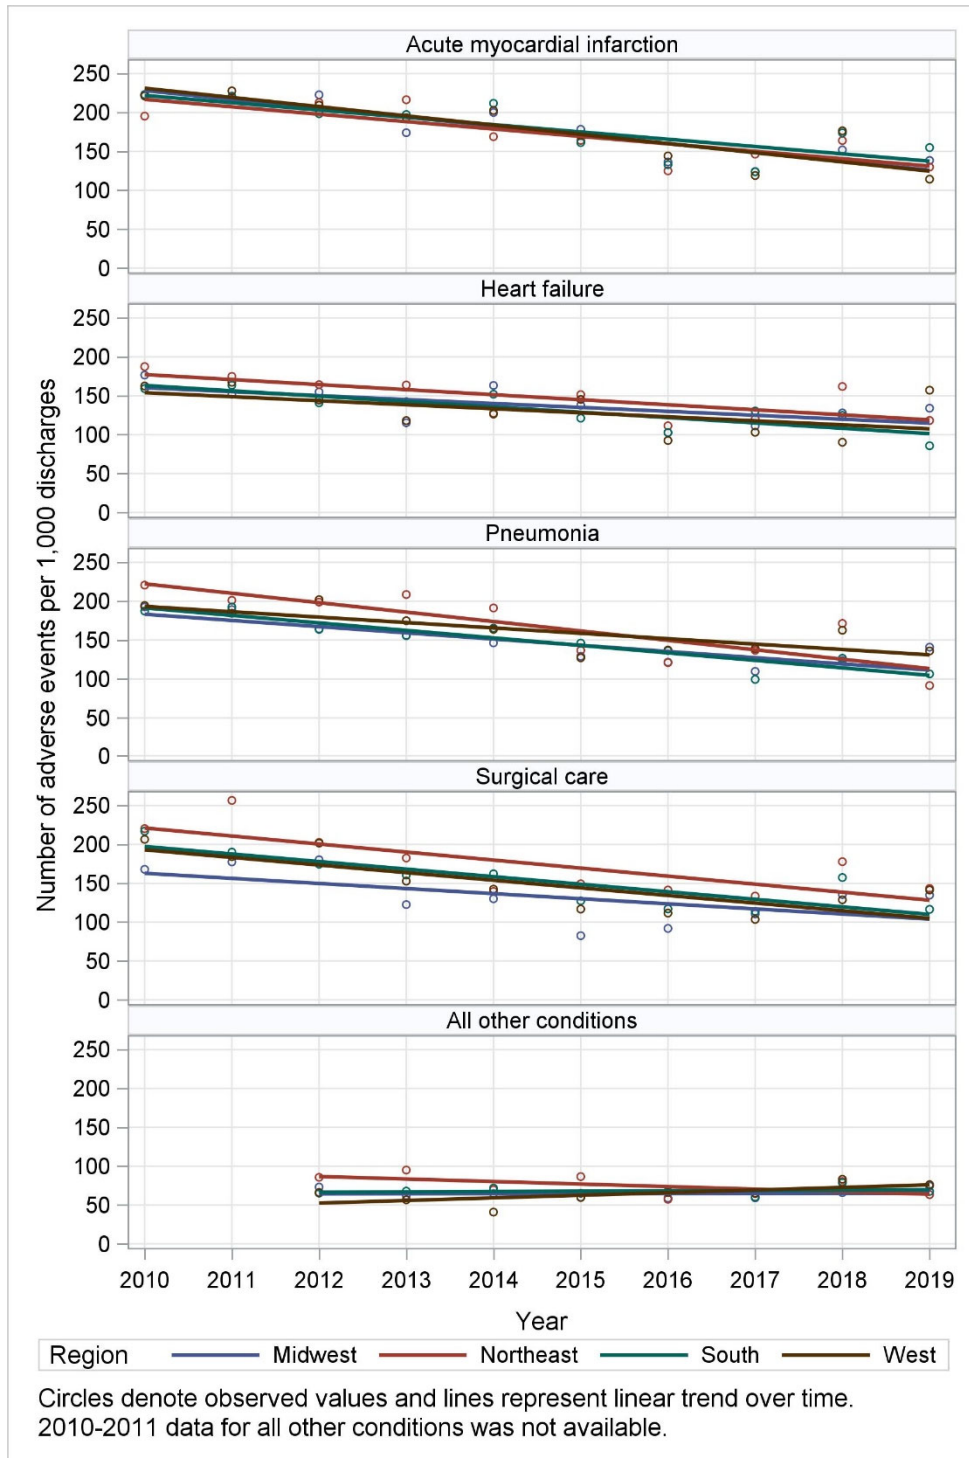

**eFigure 8. Risk-Adjusted Annual Change in Adverse Events by Regions of the United States and Condition**

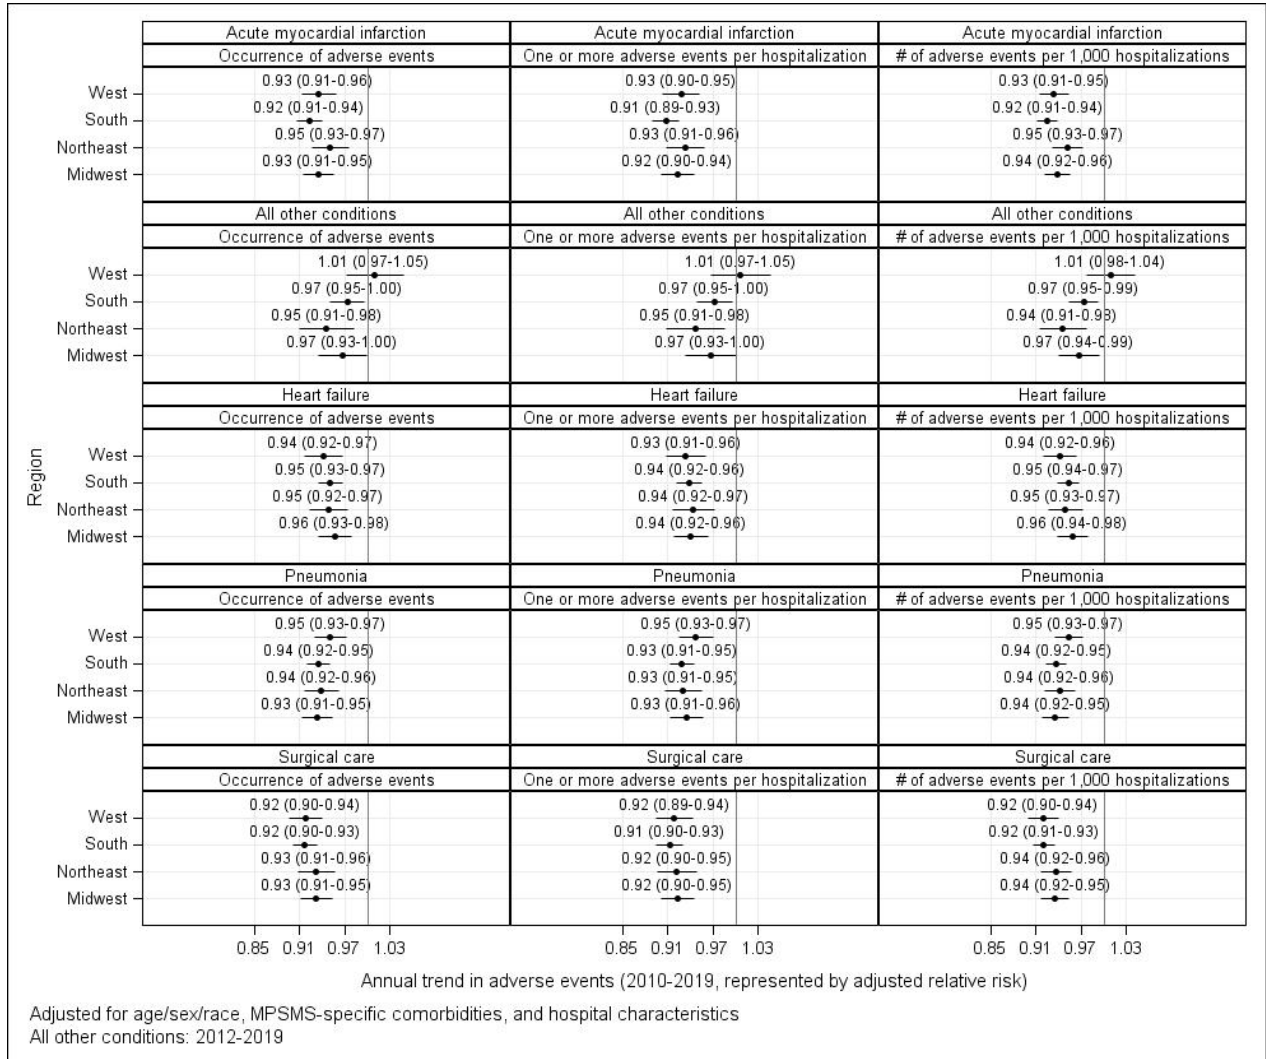

Supplement: jama-e229600-s001.pdf [file jama-e229600-s001.pdf]
